# Supplementary material for: Discrete GPCR-triggered endocytic modes enable β-arrestins to flexibly regulate cell signaling
Source: eLife journal article supplement (doi:10.7554/elife.81563), 2022-10-17
Supplement: supp [file Figure1_figure supplement 1.xlsx]

## Sheet: Ext_Fig_1c,e_linescans
frame_1	0seconds	0seconds	0seconds		200_seconds	200_seconds	200_seconds	200_seconds		0seconds	0seconds	0seconds	0seconds		200_seconds	200_seconds	200_seconds	200_seconds
micron	barr2-EGFP	clathrin	b2v2r		micron	barr2-EGFP	clathrin	b2v2r		micron	barr2-deltaCT-EGFP	clathrin	b2v2r		micron	barr2-deltaCT-EGFP	clathrin	b2v2r
0	1.00881	1.65309	1.10531		0	0.925047	0.528707	0.717613		0	1.03925	0.729469	0.906093		0	1.18303	1.24218	0.97822
0.16	0.888531	0.827628	1.08056		0.16	1.19305	0.927779	0.988533		0.16	1.02234	0.777796	0.911837		0.16	1.13037	1.31481	1.00306
0.32	0.944474	0.554948	0.97193		0.32	1.34348	1.37769	1.24816		0.32	1.06598	1.09983	0.986624		0.32	1.13549	1.01135	0.97717
0.48	0.934452	0.593705	0.96636		0.48	1.32619	1.42344	1.3046		0.48	1.00568	1.53113	0.906593		0.48	1.00651	0.727348	0.987813
0.64	1.03022	0.908107	1.01946		0.64	0.980377	0.968449	1.10787		0.64	1.05977	1.46277	0.925602		0.64	0.955174	0.718963	0.953783
0.8	1.15211	1.67606	0.971104		0.8	0.69854	0.531249	0.735352		0.8	1.07888	0.935816	1.05178		0.8	1.10212	0.998359	0.929365
0.96	1.09787	2.07873	0.922841		0.96	0.650126	0.442284	0.624082		0.96	1.03072	0.725091	0.990472		0.96	1.2653	1.59722	1.09966
1.12	1.11186	1.51027	0.92679		1.12	0.719289	0.528707	0.733739		1.12	0.993781	0.952527	0.993052		1.12	1.26233	1.80625	1.20883
1.28	1.26118	0.951704	1.02711		1.28	1.08239	1.09554	1.03691		1.28	1.05696	1.53592	1.03406		1.28	1.03783	1.41956	1.22291
1.44	1.19734	1.29966	1.06914		1.44	1.48872	1.7793	1.48361		1.44	1.00234	1.558	1.03762		1.44	0.947775	1.09417	1.01483
1.6	1.0195	1.8686	0.938011		1.6	1.37979	1.84539	1.68841		1.6	1.00195	1.0368	1.06259		1.6	1.04669	1.18858	1.01978
1.76	1.07644	1.71527	0.93426		1.76	1.08066	1.2633	1.44974		1.76	1.01477	0.914331	1.06388		1.76	1.05761	1.19954	1.07035
1.92	0.955038	1.04938	0.999403		1.92	0.93715	1.10063	1.3046		1.92	1.01807	1.24097	1.01121		1.92	0.931146	1.08075	1.02222
2.08	0.92962	0.521679	0.975005		2.08	1.10487	1.48953	1.432		2.08	0.974425	1.3939	0.993493		2.08	0.9984	1.1008	1.08761
2.24	0.815097	0.424293	1.00216		2.24	1.28815	1.56324	1.47393		2.24	1.06614	1.27857	0.859569		2.24	1.03481	1.40813	1.17921
2.4	0.775872	0.503956	1.01373		2.4	1.12216	1.18196	1.42716		2.4	1.07238	1.13413	0.874478		2.4	1.16062	1.5757	1.35416
2.56	0.661865	0.704217	0.979613		2.56	0.786722	0.754932	1.16753		2.56	1.02446	1.10517	0.981453		2.56	1.13406	1.56622	1.31704
2.72	0.934923	1.0408	0.979337		2.72	0.605171	0.5465	0.846622		2.72	0.990779	1.19812	1.03525		2.72	1.16998	1.60914	1.45463
2.88	0.932267	1.24701	1.00866		2.88	0.548112	0.439742	0.643433		2.88	1.02102	1.24676	1.04687		2.88	0.998326	1.21858	1.44882
3.04	0.85894	1.0891	1.00836		3.04	0.75387	0.39653	0.651496		3.04	1.02498	1.20464	1.10661		3.04	0.873655	0.752834	1.19051
3.2	1.0088	0.755012	0.911473		3.2	1.12043	0.592253	0.94983		3.2	0.981567	0.952104	1.21274		3.2	0.789586	0.548569	0.936904
3.36	1.09344	0.885742	0.911177		3.36	1.50947	1.12096	1.3675		3.36	0.853902	0.637865	1.10265		3.36	0.790177	0.478016	0.765905
3.52	0.985005	1.58479	0.925722		3.52	1.60284	1.26839	1.43039		3.52	0.820318	0.491158	1.07303		3.52	0.728616	0.513184	0.729773
3.68	1.05991	1.78834	0.917252		3.68	1.18959	0.968449	1.2401		3.68	0.912215	0.457545	1.17081		3.68	0.760074	0.55416	0.77409
3.84	1.11633	1.9441	0.984387		3.84	0.95617	0.841356	1.05787		3.84	0.842262	0.451724	1.10624		3.84	1.02622	0.987537	0.948149
4	0.920366	1.82078	1.07003		4	1.19824	1.20993	1.18688		4	0.816113	0.4605	1.17499		4	1.20745	1.70547	1.29087
4.16	0.831393	1.28841	1.08705		4.16	1.39016	1.5302	1.49973		4.16	0.891723	0.544008	1.13295		4.16	1.25117	1.88965	1.46456
4.32	0.907437	0.747043	1.09914		4.32	1.27605	1.71576	1.44813		4.32	0.884009	0.966035	1.13718		4.32	1.16033	1.56224	1.28782
4.48	0.910053	0.586129	1.18185		4.48	1.30371	1.84031	1.40781		4.48	0.849105	1.43105	1.11043		4.48	1.00022	1.06365	1.04369
4.64	0.942493	0.691454	1.07509		4.64	1.12043	1.60646	1.38524		4.64	0.878521	1.68163	1.04497		4.64	0.878805	0.694398	0.88455
4.8	0.723096	0.924938	1.0336		4.8	0.892195	0.986242	1.14334		4.8	0.840233	1.45684	0.942105		4.8	0.788462	0.637717	0.806764
4.96	0.725651	0.79442	0.970031		4.96	0.740037	0.627839	0.815983		4.96	0.808593	0.979189	0.841148		4.96	0.873871	0.798748	0.773675
5.12	0.743988	0.538404	0.930496		5.12	0.66223	0.523623	0.678911		5.12	0.775562	0.698435	0.869192		5.12	1.10213	1.54438	1.00967
5.28	0.848574	0.572822	1.02006		5.28	0.636294	0.419407	0.616019		5.28	0.835587	0.781103	0.933105		5.28	1.16514	1.86915	1.15516
5.44	0.946817	0.715317	1.01672		5.44	0.669146	0.36857	0.593442		5.44	0.855029	1.24757	0.920262		5.44	1.00291	1.20493	1.0794
5.6	1.02556	0.917452	1.04473		5.6	0.77116	0.427032	0.564415		5.6	0.961875	1.91558	0.96847		5.6	0.928104	0.677316	0.803035
5.76	0.976738	0.838289	1.14187		5.76	0.73485	0.498205	0.619244		5.76	1.06352	1.6474	0.970385		5.76	0.917955	0.576078	0.754661
5.92	1.11668	0.897295	1.08721		5.92	0.963086	0.823563	0.764379		5.92	1.01741	0.868761	0.917981		5.92	0.983934	0.579109	0.840387
6.08	1.16816	1.35534	1.14415		6.08	1.34694	1.48953	1.14173		6.08	1.0076	0.607426	0.893158		6.08	0.923876	0.681754	0.907372
6.24	1.27372	1.72539	1.02721		6.24	1.36769	1.50732	1.19656		6.24	1.17099	0.579434	0.914388		6.24	0.893002	0.693159	0.963868
6.4	1.21393	1.63464	0.833254		6.4	0.961357	0.973532	0.990145		6.4	1.08524	0.642027	0.873903		6.4	0.811821	0.591542	0.833662
6.56	1.26639	1.03891	0.856366		6.56	0.880091	0.80577	0.846622		6.56	1.01067	0.665916	0.920178		6.56	0.79942	0.558429	0.758742
6.72	1.08639	0.81119	0.918805		6.72	1.0772	1.24805	0.975632		6.72	0.933268	0.729078	0.865823		6.72	0.836639	0.619806	0.72797
6.88	1.1006	0.630361	0.992723		6.88	1.26913	2.05128	1.23688		6.88	0.844135	0.914268	0.932729		6.88	0.945182	0.756039	0.851021
7.04	0.966345	0.56263	0.972477		7.04	1.2017	1.89369	1.17398		7.04	0.93954	1.11804	1.00204		7.04	0.970983	0.885766	0.893469
7.2	0.776113	0.596805	1.04089		7.2	1.05127	1.23026	0.870812		7.2	0.923049	1.1047	0.952822		7.2	0.986218	0.891489	0.931817
7.36	0.836755	0.647721	0.961173		7.36	0.933692	1.00149	0.786956		7.36	1.00035	0.841397	1.05005		7.36	0.899771	0.7154	0.897411
7.52	1.16825	1.02337	0.967539		7.52	0.893924	0.904902	0.862749		7.52	1.0443	0.65083	0.996023		7.52	0.924624	0.587442	0.874109
7.68	1.35566	1.54248	1.02299		7.68	0.954441	0.744765	0.920803		7.68	1.0796	0.628344	0.958575		7.68	0.936039	0.5612	0.939653
7.84	1.10073	2.1105	0.94556		7.84	0.95617	0.632923	0.825658		7.84	1.06063	0.570951	1.03006		7.84	0.825125	0.571799	0.806429
8	1.25844	2.39457	0.949102		8	0.931963	0.676135	0.824046		8	1.13422	0.57697	0.984029		8	0.860766	0.642249	0.802059
8.16	1.05458	1.7049	0.834458		8.16	0.980377	0.884567	0.856298		8.16	1.16303	0.528128	1.01087		8.16	0.934124	0.915733	0.900819
8.32	0.963487	0.898384	0.950615		8.32	1.00977	1.03708	0.951442		8.32	1.06344	0.52622	1.05276		8.32	0.999483	0.875169	1.09068
8.48	1.07113	0.676151	0.950839		8.48	1.00458	1.12604	0.917578		8.48	0.97433	0.582342	0.998192		8.48	1.03965	0.823552	1.0042
8.64	0.890832	0.680339	1.05041		8.64	1.053	1.12604	0.998208		8.64	0.946339	0.618092	1.00521		8.64	1.04276	0.831233	0.958173
8.8	0.783125	0.500024	1.09152		8.8	0.831677	0.864232	0.796631		8.8	1.23078	0.719339	0.975401		8.8	0.951765	0.813678	0.993145
8.96	1.21677	0.416611	1.06643		8.96	0.769431	0.907444	0.677298		8.96	1.20172	0.870542	0.943852		8.96	1.03007	1.16849	0.998766
9.12	0.914062	0.365817	0.990242		9.12	0.888736	1.05487	0.80792		9.12	1.08966	0.93799	0.889067		9.12	1.15716	1.41627	1.01789
9.28	1.07079	0.381317	1.00014		9.28	0.954441	1.0142	0.885325		9.28	1.03186	1.01107	0.878006		9.28	1.11776	1.23986	1.02216
9.44	1.11318	0.338567	0.927041		9.44	0.888736	0.787977	0.761154		9.44	1.07127	1.27793	1.06691		9.44	1.15206	1.21622	0.976321
9.6	0.925291	0.381846	1.0243		9.6	0.719289	0.541416	0.661172		9.6	1.09459	1.54587	1.02712		9.6	1.09452	1.14725	1.1
9.76	1.02444	0.337448	1.07904		9.76	0.688166	0.472786	0.588604		9.76	1.12702	1.74286	1.09701		9.76	1.03534	0.896358	1.09132
9.92	0.93356	0.389467	1.02824		9.92	0.636294	0.470244	0.611181		9.92	1.15514	1.83002	1.11653		9.92	1.02436	0.727877	0.928403

## Sheet: Ext_Fig_1f_b2v2r_internal
minutes	EGFP	EGFP	EGFP	barr2-EGFP	barr2-EGFP	barr2-EGFP	barr2-deltaCT-EGFP	barr2-deltaCT-EGFP	barr2-deltaCT-EGFP
5	1	0	0	53	48	43	50	49	41
30	8	1	13	78	74	75	74	68	69

## Sheet: Ext_Fig_1g_b2ar-3s_internal
minutes	b2ar	b2ar	b2ar	b2ar	b2ar-3s	b2ar-3s	b2ar-3s	b2ar-3s
5	55	72	70	52	24	37	34	21
30	100	100	100	100	60	69	72	60

## Sheet: Ext_Fig_1h_barr1_internal
EGFP	EGFP	EGFP	barr2	barr2	barr2	barr2-deltaCT	barr2-deltaCT	barr2-deltaCT
6	15	10	58	63	51	22	31	35

## Sheet: Ext_Fig_1i_siRNA_internal
EGFP Control			EGFP CHC siRNA			βarr2 Control			βarr2 CHC siRNA			βarr2-ΔCT Control			βarr2-ΔCT CHC siRNA
9	9	27	-3	-2	-5	62	63	60	24	19	24	48	60	47	7	17	16
