# Supplementary material for: Discrete GPCR-triggered endocytic modes enable β-arrestins to flexibly regulate cell signaling
Source: eLife journal article supplement (doi:10.7554/elife.81563), 2022-10-17
Supplement: supp [file Figure1_source_Data.xlsx]

## Sheet: Fig_1e_linescan
EGFP_Frame_0sectxt	EGFP_Frame_0sectxt	EGFP_Frame_0sectxt	EGFP_Frame_0sectxt		EGFP_Frame_200sectxt	EGFP_Frame_200sectxt	EGFP_Frame_200sectxt	EGFP_Frame_200sectxt		barr2_Frame_0sectxt	barr2_Frame_0sectxt	barr2_Frame_0sectxt	barr2_Frame_0sectxt		condition	barr2_Frame_200sectxt	barr2_Frame_200sectxt	barr2_Frame_200sectxt	barr2_Frame_200sectxt		barr2-CCS_Frame_0sectxt	barr2-CCS_Frame_0sectxt	barr2-CCS_Frame_0sectxt	barr2-CCS_Frame_0sectxt		barr2-CCS_Frame_198sectxt	barr2-CCS_Frame_198sectxt	barr2-CCS_Frame_198sectxt	barr2-CCS_Frame_198sectxt		barr2-deltaCT_Frame_0sectxt	barr2-deltaCT_Frame_0sectxt	barr2-deltaCT_Frame_0sectxt	barr2-deltaCT_Frame_0sectxt		barr2-deltaCT_Frame_200sectxt	barr2-deltaCT_Frame_200sectxt	barr2-deltaCT_Frame_200sectxt	barr2-deltaCT_Frame_200sectxt
microns	EGFP	Clathrin	beta2AR		microns	EGFP	Clathrin	beta2AR		microns	barr2	Clathrin	beta2AR		measure	microns	barr2	Clathrin	beta2AR		microns	barr2-CCS	Clathrin	beta2AR		microns	barr2-CCS	Clathrin	beta2AR		microns	barr2-deltaCT	Clathrin	beta2AR		microns	barr2-deltaCT	Clathrin	beta2AR
0	1.01039	1.06124	1.03059		0	0.992737	0.406638	1.09158		0	1.02386	0.675886	0.9282		0	0	1.01086	0.875251	1.2334		0	1.10612	0.575503	0.951305		0	0.833124	0.347522	0.865541		0	0.920258	0.576319	1.02463		0	0.902084	0.794389	0.921737
0.16	0.97208	0.645566	0.98893		0.16	0.986881	0.453804	1.09152		0.16	0.924467	0.643963	0.982361		1	0.16	0.939676	0.692009	0.977525		0.16	1.06691	0.512406	0.90284		0.16	0.834461	0.330799	0.857534		0.16	0.86258	0.566198	1.01316		0.16	0.863247	0.780223	0.808861
0.32	1.00345	0.571819	0.976598		0.32	1.00878	0.575141	1.15347		0.32	0.973005	0.782068	1.0492		2	0.32	0.786295	0.616427	0.917298		0.32	1.04648	0.55235	0.94426		0.32	0.890177	0.302855	0.846128		0.32	0.899248	0.625447	1.00224		0.32	0.865431	0.743444	0.773143
0.48	0.981877	0.60343	1.01446		0.48	1.04947	1.02103	1.16462		0.48	0.999209	1.0177	1.06714		3	0.48	0.794936	0.580108	1.01746		0.48	0.998475	0.553934	0.955505		0.48	0.925741	0.310415	0.826821		0.48	0.859593	0.67744	0.983282		0.48	0.852216	0.689242	0.795812
0.64	0.910141	0.934445	1.07252		0.64	1.01888	1.68066	1.22199		0.64	0.977546	1.30645	1.09158		4	0.64	0.89294	0.732887	1.04339		0.64	0.989367	0.48324	0.931275		0.64	0.993591	0.382832	0.846976		0.64	0.868677	0.662181	0.961919		0.64	0.803575	0.636433	0.767589
0.8	1.01755	1.70605	1.09476		0.8	1.05787	1.65217	1.32497		0.8	1.05374	1.55171	1.12637		5	0.8	0.999174	0.939655	1.26724		0.8	0.949233	0.449733	0.848282		0.8	1.09142	0.611175	0.949748		0.8	0.962189	0.846539	0.981805		0.8	0.80998	0.629044	0.738531
0.96	1.09242	2.06526	1.13268		0.96	1.05976	1.06931	1.25885		0.96	1.04608	1.3334	1.06131		6	0.96	1.3019	1.34795	1.57184		0.96	0.98433	0.410772	0.928011		0.96	1.11323	1.07066	1.06794		0.96	0.892455	1.20798	0.978174		0.96	0.780727	0.625761	0.770506
1.12	0.983691	1.28984	1.07538		1.12	1.09164	0.729268	1.11225		1.12	1.00485	0.93507	0.99833		7	1.12	1.36992	1.79742	2.03237		1.12	0.978487	0.402132	0.852861		1.12	1.06052	1.1241	1.03409		1.12	0.962513	1.45962	0.983202		1.12	0.861389	0.633416	0.749078
1.28	0.99713	0.854155	1.0777		1.28	1.07037	0.618224	1.09092		1.28	0.967353	0.668258	1.06014		8	1.28	1.36623	1.68394	2.08858		1.28	1.07711	0.478398	0.884226		1.28	0.950491	0.769136	0.946657		1.28	1.08533	1.48656	1.0075		1.28	0.865869	0.668151	0.790679
1.44	1.04576	0.749852	1.15215		1.44	1.0201	0.846765	1.00496		1.44	0.93821	0.577363	1.06824		9	1.44	1.13694	1.23535	1.54513		1.44	1.13958	0.78168	0.975123		1.44	0.934007	0.489701	0.928755		1.44	1.02023	1.40807	1.03521		1.44	0.888404	0.761071	0.801724
1.6	0.885802	0.791659	1.19567		1.6	1.02269	1.64746	0.98657		1.6	0.951286	0.500676	1.07597		10	1.6	0.93065	0.928005	1.20696		1.6	1.14479	1.25682	1.00675		1.6	0.915025	0.408947	0.90388		1.6	0.922706	1.46531	1.10995		1.6	0.951592	0.965355	0.811887
1.76	0.953019	0.971476	1.18169		1.76	1.08132	2.30648	0.987481		1.76	0.948568	0.478744	1.11358		11	1.76	0.834343	0.727743	1.01939		1.76	0.958192	1.74747	1.01947		1.76	0.908617	0.401901	0.897255		1.76	0.995794	1.44915	1.07586		1.76	0.897392	1.09792	0.890981
1.92	0.970323	1.48172	1.20771		1.92	1.07012	1.81223	0.978464		1.92	0.896599	0.475473	1.07837		12	1.92	0.802867	0.59793	0.88283		1.92	0.998057	1.83171	0.986381		1.92	0.950615	0.477339	0.89013		1.92	0.846818	1.09343	0.990132		1.92	1.0219	1.18111	0.92152
2.08	0.960425	1.74852	1.18811		2.08	1.02261	1.11596	0.93303		2.08	0.863244	0.468986	1.10457		13	2.08	0.769294	0.50396	0.798244		2.08	0.992608	1.4269	1.07206		2.08	1.04418	0.810051	0.855753		2.08	0.910713	0.797815	0.971847		2.08	1.11434	1.31765	1.09888
2.24	1.0164	1.20515	1.06709		2.24	1.08949	0.73478	0.96118		2.24	0.851053	0.49299	1.05907		14	2.24	0.764998	0.418435	0.759874		2.24	1.0073	0.857394	0.961663		2.24	1.12012	1.61036	1.06879		2.24	1.08587	0.763232	0.899098		2.24	1.30707	1.67085	1.17379
2.4	0.954665	0.839083	1.02526		2.4	1.08787	0.611076	0.927553		2.4	0.90105	0.740014	1.01433		15	2.4	0.682498	0.392291	0.743441		2.4	1.05655	0.560002	0.905032		2.4	1.33443	2.55667	1.37867		2.4	1.2188	0.813802	0.850069		2.4	1.28041	1.77592	1.29475
2.56	1.11821	0.684093	1.05055		2.56	1.056	0.613527	1.01262		2.56	0.990358	1.59967	0.954478		16	2.56	0.747679	0.393687	0.761323		2.56	1.0539	0.443003	0.911748		2.56	1.45103	3.02252	1.67188		2.56	1.17451	0.843889	0.86651		2.56	1.04638	1.3313	1.26061
2.72	0.999329	0.593059	1.05713		2.72	1.07864	0.868277	1.12228		2.72	1.15566	2.45934	0.889312		17	2.72	0.890153	0.562924	0.931239		2.72	1.00621	0.426845	0.93341		2.72	1.22546	2.53013	1.50408		2.72	0.95149	0.923302	0.885687		2.72	0.915818	0.904794	1.02006
2.88	1.03668	0.703669	1.07702		2.88	1.04805	1.11942	1.10955		2.88	1.16192	2.47824	0.823339		18	2.88	1.17819	0.921001	1.30382		2.88	0.959255	0.531499	0.959294		2.88	0.987709	1.5483	1.10627		2.88	0.895584	1.19205	0.890694		2.88	0.967785	0.861209	0.915989
3.04	1.0251	1.03854	0.962738		3.04	1.00261	1.36247	1.13208		3.04	1.10211	1.9469	0.808075		19	3.04	1.29363	1.21143	1.47795		3.04	1.04639	0.979365	0.970654		3.04	0.982907	0.829381	1.01446		3.04	0.911053	1.21836	0.939153		3.04	0.979994	0.999597	0.9414
3.2	1.05398	1.15921	0.95876		3.2	1.00148	1.59964	1.07561		3.2	1.10206	1.37436	0.854426		20	3.2	1.31267	1.29868	1.4209		3.2	1.0845	2.17262	0.958816		3.2	0.865131	0.580282	0.89471		3.2	0.917826	1.01398	0.928864		3.2	0.988346	0.99107	0.912118
3.36	1.01207	0.975821	0.968665		3.36	1.00217	1.86094	1.01778		3.36	0.98562	0.93804	0.79328		21	3.36	1.32344	1.4033	1.39731		3.36	0.994989	3.14614	0.916459		3.36	0.91886	0.510978	0.792045		3.36	0.991849	0.884218	1.01399		3.36	1.10753	1.05094	0.918411
3.52	0.989552	0.882914	1.00901		3.52	1.0203	2.15351	1.05299		3.52	0.981857	0.707543	0.840262		22	3.52	1.19324	1.37948	1.34566		3.52	1.01839	2.91915	0.941677		3.52	0.870148	0.421613	0.849505		3.52	1.07473	0.785249	1.06154		3.52	1.23039	1.33316	1.07587
3.68	1.02379	1.34166	1.01381		3.68	1.04512	1.80211	1.02117		3.68	0.856113	0.55353	0.808531		23	3.68	1.05886	1.09384	1.1049		3.68	0.922868	1.893	0.962427		3.68	0.93014	0.387224	0.803013		3.68	1.33542	0.716455	0.971301		3.68	1.20299	1.35613	1.13416
3.84	0.995982	1.67753	1.03025		3.84	1.12016	1.10164	1.00104		3.84	0.901172	0.525986	0.787984		24	3.84	0.890211	0.770764	0.855528		3.84	0.928934	0.958914	0.949101		3.84	0.930414	0.384057	0.791831		3.84	1.55102	0.694019	0.920484		3.84	1.04444	1.10534	1.0554
4	0.972558	1.22246	1.02403		4	1.04165	0.702963	1.01139		4	0.93085	0.699912	0.846908		25	4	0.812573	0.583432	0.79597		4	0.896735	0.577933	0.974149		4	0.915444	0.400563	0.845004		4	1.34169	0.668597	1.02953		4	1.03155	0.850225	0.937881
4.16	0.97495	0.698911	1.04249		4.16	0.937536	0.537727	0.948581		4.16	0.939841	0.955769	0.917899		26	4.16	0.78444	0.575853	0.775852		4.16	0.967341	0.479744	1.0592		4.16	0.918307	0.48538	0.848954		4.16	1.09506	0.684775	1.02739		4.16	0.996804	0.788446	0.958689
4.32	0.925818	0.534393	1.02452		4.32	0.953271	0.491925	0.887298		4.32	1.07389	1.35941	0.924299		27	4.32	0.913906	0.913413	0.80125		4.32	1.03048	0.414274	1.10106		4.32	0.923479	0.578431	0.810587		4.32	1.03433	0.688888	0.980428		4.32	0.913517	0.716593	0.931351
4.48	0.957428	0.520848	1.00651		4.48	0.965786	0.504924	0.857041		4.48	0.968444	1.5838	0.986707		28	4.48	1.15964	1.47288	1.11188		4.48	0.996647	0.397496	1.07473		4.48	0.863133	0.612087	0.865277		4.48	0.975378	0.734434	1.028		4.48	0.884441	0.695172	0.845618
4.64	0.925241	0.453864	0.972845		4.64	0.949935	0.633119	0.827746		4.64	0.965535	1.41629	0.977054		29	4.64	1.38171	1.85849	1.32743		4.64	0.975276	0.393202	1.0322		4.64	0.952828	0.654925	0.87311		4.64	0.951627	0.799922	1.0711		4.64	0.860258	0.595198	0.841421
4.8	0.876983	0.577751	0.8959		4.8	1.00249	0.866425	0.853404		4.8	1.01813	1.08214	1.09647		30	4.8	1.27409	1.80524	1.33604		4.8	1.02484	0.361396	0.939464		4.8	1.01581	1.15609	0.980624		4.8	0.999912	0.936966	1.06504		4.8	0.842134	0.576037	0.887176
4.96	0.855294	0.773097	0.818426		4.96	0.983567	1.22717	0.838844		4.96	1.04812	1.13981	1.23291		31	4.96	1.15422	1.42667	1.06785		4.96	1.03698	0.394272	0.924366		4.96	1.12129	1.71612	1.13416		4.96	0.997921	1.07063	1.0781		4.96	0.828193	0.594944	0.963184
5.12	0.910815	1.09932	0.87891		5.12	1.02453	1.79172	0.876367		5.12	1.03601	1.35996	1.18317		32	5.12	1.11578	1.22272	0.975968		5.12	1.08624	0.413933	0.980358		5.12	1.10149	1.63522	1.25487		5.12	0.96902	1.35394	1.01863		5.12	0.84886	0.622675	0.991507
5.28	0.919884	1.67412	0.928013		5.28	0.994689	1.9759	0.95044		5.28	1.0144	1.41659	1.03482		33	5.28	1.18452	1.38384	0.999308		5.28	1.03932	0.446043	0.983275		5.28	1.05533	1.32397	1.08025		5.28	1.06042	1.7963	0.940417		5.28	0.91974	0.691449	1.03311
5.44	0.944542	2.5196	0.990041		5.44	1.00534	1.4534	1.04899		5.44	1.06737	1.13893	0.92629		34	5.44	1.1422	1.47465	1.09237		5.44	0.946689	0.640457	1.00722		5.44	1.03601	1.0438	1.05244		5.44	1.0486	1.8703	0.974308		5.44	0.96268	0.883019	1.11612
5.6	1.02137	2.47469	1.0435		5.6	1.04238	0.931311	1.0541		5.6	1.01828	0.897877	0.869182		35	5.6	1.03676	1.26369	1.1354		5.6	1.06585	1.21816	1.11854		5.6	0.943917	0.773496	0.975674		5.6	1.02016	1.46489	1.08918		5.6	1.04375	1.10537	1.11262
5.76	0.99968	1.53162	1.04783		5.76	1.04036	0.579294	1.05314		5.76	0.992996	0.942669	0.844829		36	5.76	0.864162	0.954365	0.908742		5.76	1.07298	2.01365	1.13443		5.76	0.903149	0.607763	0.852691		5.76	0.970013	1.02157	1.12385		5.76	1.13592	1.34069	1.14149
5.92	1.05631	0.836288	1.01981		5.92	1.03444	0.504693	1.11629		5.92	0.996302	1.17022	0.815232		37	5.92	0.85156	0.87531	0.755153		5.92	1.03565	2.37738	0.990003		5.92	0.850489	0.581732	0.860967		5.92	0.951869	0.899426	1.16201		5.92	1.17443	1.4953	1.18764
6.08	1.01004	0.661061	1.02542		6.08	1.09746	0.53142	1.01072		6.08	0.985726	1.29749	0.924443		38	6.08	1.01246	1.16726	0.906912		6.08	1.10185	2.2189	0.937598		6.08	0.89108	0.634201	0.87615		6.08	0.880251	0.817027	1.17011		6.08	1.12539	1.37435	1.0877
6.24	0.975579	0.68635	0.952001		6.24	1.07521	0.53988	0.976851		6.24	0.977751	1.32345	0.867661		39	6.24	1.0937	1.46033	1.07968		6.24	1.06363	1.81569	0.966736		6.24	0.950744	0.688987	0.870891		6.24	0.887524	0.756931	1.17849		6.24	1.02416	1.07031	1.04249
6.4	1.01718	0.762569	0.906498		6.4	0.983774	0.514105	0.910221		6.4	1.04711	1.27875	0.828716		40	6.4	1.00449	1.4438	0.975086		6.4	1.11427	1.1523	0.927023		6.4	0.921841	0.713096	0.93034		6.4	0.956628	0.818467	1.12687		6.4	0.974538	0.828247	0.981252
6.56	1.04504	0.611766	0.872238		6.56	0.986876	0.539942	0.930204		6.56	1.05639	1.10983	0.88376		41	6.56	0.974892	1.18517	0.804235		6.56	0.963605	0.750615	1.00643		6.56	0.934415	0.732142	0.867328		6.56	0.878441	0.822573	1.08152		6.56	1.00886	0.740999	0.962339
6.72	1.06291	0.432796	0.824136		6.72	1.04509	0.642716	0.959514		6.72	1.04028	0.906665	0.985452		42	6.72	0.961552	0.942422	0.683557		6.72	1.00677	0.597446	0.977087		6.72	0.973008	0.88028	0.927131		6.72	0.930816	0.790976	1.00989		6.72	1.01697	0.734295	1.07511
6.88	1.06055	0.418945	0.920803		6.88	0.984968	1.22277	0.959702		6.88	1.01929	0.838219	1.02736		43	6.88	0.914449	0.732167	0.616633		6.88	0.953697	0.538099	0.957517		6.88	1.02776	1.30637	1.0193		6.88	0.849993	0.762371	1.01947		6.88	1.10384	1.00586	1.21721
7.04	1.08116	0.541917	0.946856		7.04	1.00762	2.03901	0.995312		7.04	1.02202	0.938582	1.05299		44	7.04	0.808241	0.661352	0.623694		7.04	0.955953	0.579634	0.99068		7.04	1.21326	2.03376	1.2079		7.04	0.927504	0.879627	0.964743		7.04	1.20689	1.19921	1.33759
7.2	1.17952	0.995612	0.933018		7.2	0.959176	1.93873	0.959995		7.2	1.01078	1.22052	1.12183		45	7.2	0.916083	0.742633	0.67735		7.2	0.954577	0.77879	1.06183		7.2	1.20285	2.45118	1.43617		7.2	0.961567	1.23836	0.965115		7.2	1.13932	1.05978	1.16081
7.36	1.14514	1.40204	0.942948		7.36	0.968707	1.08186	0.984904		7.36	1.06833	1.52508	1.13236		46	7.36	1.07406	1.10324	0.898696		7.36	0.915821	1.07399	1.08623		7.36	1.17285	2.40373	1.5545		7.36	1.03529	1.45174	1.0159		7.36	0.975653	0.845346	0.96974
7.52	1.05305	1.25801	0.998144		7.52	0.973719	0.593109	0.974141		7.52	1.00892	1.55139	1.11938		47	7.52	1.17406	1.51111	1.17608		7.52	0.956336	1.12883	1.1319		7.52	1.08044	1.85179	1.30555		7.52	0.968727	1.23616	1.00655		7.52	0.994644	0.742518	0.878762
7.68	1.09139	0.820772	1.03404		7.68	0.948706	0.460942	0.96879		7.68	1.02327	1.49623	1.17819		48	7.68	1.27065	1.61359	1.35525		7.68	0.94218	1.50517	1.0769		7.68	0.950819	1.10796	1.04161		7.68	0.976809	1.01772	1.04076		7.68	0.968468	0.866998	0.929527
7.84	1.09073	0.635285	0.969011		7.84	0.869759	0.426064	0.934687		7.84	0.999396	1.21605	1.11534		49	7.84	1.24181	1.66056	1.25598		7.84	0.976812	2.34208	0.971327		7.84	0.888818	0.739236	0.913809		7.84	0.959021	0.923193	1.01861		7.84	1.0011	1.14486	1.03369
8	1.04814	0.486137	0.947179		8	0.929107	0.466422	0.946957		8	1.00437	0.868478	1.0954		50	8	1.15403	1.52357	1.05324		8	1.03312	2.57568	0.96465		8	0.910513	0.641817	0.869941		8	0.955459	0.838887	1.02536		8	0.967785	1.25223	1.07614
8.16	1.0463	0.474467	0.967205		8.16	1.02515	0.636349	0.97795		8.16	1.03665	0.703968	1.12096		51	8.16	1.00779	1.15118	0.807804		8.16	1.01932	2.05111	0.949488		8.16	0.859266	0.570687	0.846201		8.16	1.02029	0.764341	1.04516		8.16	0.961223	1.07807	0.974873
8.32	1.01078	0.785101	1.05186		8.32	1.02206	1.01646	0.998692		8.32	1.08355	0.628713	1.06315		52	8.32	0.852301	0.822511	0.737874		8.32	0.962909	1.25933	1.00692		8.32	0.885273	0.556394	0.893676		8.32	1.01015	0.74135	0.948095		8.32	0.877623	0.907095	0.875742
8.48	1.055	1.49076	0.982267		8.48	1.05649	1.26158	0.98957		8.48	1.01741	0.58427	1.05197		53	8.48	0.919059	0.66496	0.665126		8.48	0.952143	0.826662	1.12101		8.48	0.880101	0.550041	0.863462		8.48	1.0231	0.799666	0.953633		8.48	0.888602	0.811528	0.942176
8.64	1.08649	1.92757	0.9841		8.64	1.00021	1.47228	1.00553		8.64	1.04906	0.581887	1.06478		54	8.64	0.843368	0.600151	0.685199		8.64	0.957719	0.669118	1.08341		8.64	0.908171	0.656277	0.844734		8.64	1.01958	0.949051	0.933363		8.64	0.919394	0.82962	0.911766
8.8	1.04211	1.6781	0.932159		8.8	0.947079	1.1941	0.901078		8.8	1.05529	0.589242	1.16057		55	8.8	0.842348	0.58585	0.631774		8.8	0.91061	0.590044	0.993949		8.8	1.06856	1.09098	0.91673		8.8	0.967425	1.02822	0.910627		8.8	0.995672	1.04103	0.99853
8.96	1.07202	1.54643	0.969466		8.96	0.994867	0.736646	0.827424		8.96	1.02326	0.59256	1.1316		56	8.96	0.794782	0.560648	0.710047		8.96	0.931823	0.514373	1.04058		8.96	1.0746	1.68987	0.997953		8.96	1.00865	1.10884	0.997561		8.96	1.1344	1.44702	1.17637
9.12	1.02368	1.20011	1.01003		9.12	0.869209	0.562212	0.8958		9.12	0.999947	0.62143	1.10823		57	9.12	0.841452	0.564693	0.677923		9.12	0.923274	0.505134	1.14797		9.12	1.19197	1.8774	1.26669		9.12	0.989702	1.28797	0.979885		9.12	1.26193	1.7097	1.25682
9.28	0.946865	0.813828	0.982886		9.28	0.879054	0.476137	0.802048		9.28	0.981802	0.68326	1.05468		58	9.28	0.890816	0.604337	0.699423		9.28	0.886704	0.456962	1.20385		9.28	1.20502	1.89609	1.3621		9.28	0.994222	1.47395	0.902811		9.28	1.22908	1.67414	1.26021
9.44	0.882135	0.568343	0.933303		9.44	0.881172	0.523301	0.864249		9.44	0.96702	0.715135	0.919392		59	9.44	0.89146	0.648949	0.71398		9.44	0.930146	0.47024	1.15382		9.44	1.12254	1.70975	1.22269		9.44	1.0503	1.40511	0.855852		9.44	1.20753	1.57271	1.25628
9.6	0.870868	0.472583	0.860352		9.6	0.784431	0.769194	0.939054		9.6	1.00562	0.667795	0.875691		60	9.6	0.858135	0.820375	0.744001		9.6	0.981616	0.639573	1.11581		9.6	1.05249	1.10444	1.01631		9.6	1.11295	1.11085	0.945356		9.6	1.03388	1.28956	1.21881
9.76	0.877004	0.421848	0.860429		9.76	0.824847	0.771488	1.03298		9.76	1.03978	0.586652	0.893209		61	9.76	0.9359	0.906564	0.744729		9.76	0.935106	0.916209	1.05334		9.76	0.986345	0.758204	0.921821		9.76	1.04302	0.925205	0.99207		9.76	1.01702	0.968242	1.06778
9.92	0.875625	0.414871	0.891608		9.92	0.804147	0.620185	1.09546		9.92	0.969499	0.539574	1.03625		62	9.92	0.93734	0.77659	0.675166		9.92	0.978872	0.903265	1.09591		9.92	0.954327	0.677335	0.896075		9.92	1.05932	0.890166	0.977903		9.92	0.974435	0.947659	1.01699

## Sheet: Fig_1f_b2ar_internalization
	cell_line_1	cell_line_1	cell_line_1	cell_line_1	cell_line_1	cell_line_1	cell_line_1	cell_line_1	cell_line_1	cell_line_1	cell_line_1	cell_line_1
	EGFP	EGFP	EGFP	barr2	barr2	barr2	barr2-CCS	barr2-CCS	barr2-CCS	barr2-deltaCT	barr2-deltaCT	barr2-deltaCT
Minutes
5	1	0	7	25	27	14	15	14	17	13	18	14
30	0	7	17	60	58	49	40	43	36	40	53	44
	cell_line_2	cell_line_2	cell_line_2	cell_line_2	cell_line_2	cell_line_2	cell_line_2	cell_line_2	cell_line_2	cell_line_2	cell_line_2	cell_line_2
	EGFP	EGFP	EGFP	barr2	barr2	barr2	barr2-CCS	barr2-CCS	barr2-CCS	barr2-deltaCT	barr2-deltaCT	barr2-deltaCT
Minutes
5	1	0	0	33	24	15	25	21	13	22	19	13
30	14	20	18	66	63	57	52	52	38	46	55	42
