# Supplementary material for: Discrete GPCR-triggered endocytic modes enable β-arrestins to flexibly regulate cell signaling
Source: eLife journal article supplement (doi:10.7554/elife.81563), 2022-10-17
Supplement: supp [file Figure2_source_data.xlsx]

## Sheet: Fig_2a_b2v2r_internalization
Genotype	% B2V2R Internalization
EGFP	14
EGFP	13
EGFP	8
EGFP	3
EGFP	11
EGFP	-3
EGFP	6
EGFP	0.1
EGFP	4
EGFP	14
EGFP	24
barr2	69
barr2	69
barr2	72
barr2	69
barr2	68
barr2	78
barr2	61
barr2	73
barr2	80
barr2	78
Chi-A.1	64
Chi-A.1	64
Chi-A.1	64
Chi-A	59
Chi-A	64
Chi-A	52
Chi-A.2	57
Chi-A.2	63
Chi-A.2	59
Chi-A.3	64
Chi-A.3	68
Chi-A.3	66
Chi-A.4	62
Chi-A.4	65
Chi-A.4	62
Chi-A.7	43
Chi-A.7	47
Chi-A.7	42
Chi-A.5	63
Chi-A.5	57
Chi-A.5	67
Chi-A.5	66
Chi-A.6	67
Chi-A.6	57
Chi-A.6	62
Chi-A.6	61
Chi-A.8	59
Chi-A.8	60
Chi-A.8	57
Chi-A.9	0
Chi-A.9	0
Chi-A.9	-2
Chi-A.10	8
Chi-A.10	-17
Chi-A.10	2
Chi-A.11	3
Chi-A.11	4
Chi-A.11	1
Chi-A.12	46
Chi-A.12	57
Chi-A.12	44
Chi-A.13	44
Chi-A.13	47
Chi-A.13	41
Chi-A.14	35
Chi-A.14	30
Chi-A.14	32
v-arr	0
v-arr	0.005
v-arr	0

## Sheet: Fig_2d_EGFP_pm_recruitment
genotype	EGFP_PM_recruitment_F_max_over_F_-iso
EGFP	0.996172
EGFP.1	1.06138
EGFP.2	1.08059
EGFP.3	1.00158
EGFP.4	1.05527
EGFP.5	1.06103
EGFP.6	1.02872
EGFP.7	1.08881
EGFP.8	1.13768
βArr2	1.2666
βArr2.1	1.7614
βArr2.2	1.15801
βArr2.3	1.67861
βArr2.4	1.09988
βArr2.5	1.26903
βArr2.6	1.07417
βArr2.7	1.11049
βArr2.8	1.21608
βArr2.9	1.40072
βArr2.10	1.14259
v-arr	1.15255
v-arr.1	1.30631
v-arr.2	1.11233
v-arr.3	1.42689
v-arr.4	1.24092
v-arr.5	1.3497
v-arr.6	1.24512
v-arr.7	1.52419
v-arr.8	1.2453
Chi.A-9	1.19706
Chi.A-9.1	1.33262
Chi.A-9.2	1.19217
Chi.A-9.3	1.33472
Chi.A-9.4	1.09235
Chi.A-9.5	1.26335
Chi.A-9.6	1.3495
Chi.A-9.7	1.24652
Chi.A-9.8	1.24523
Chi.A-9.9	1.18554
Chi.A-10	1.2971
Chi.A-10.1	1.40254
Chi.A-10.2	1.80817
Chi.A-10.3	1.3168
Chi.A-10.4	1.25877
Chi.A-10.5	1.5973
Chi.A-10.6	1.16415
Chi.A-10.7	1.1285
Chi.A-10.8	1.35082
Chi.A-10.9	1.44883
Chi.A-11	1.31202
Chi.A-11.1	1.25939
Chi.A-11.2	1.1364
Chi.A-11.3	1.27674
Chi.A-11.4	1.31762
Chi.A-11.5	1.23235
Chi.A-11.6	1.53254
Chi.A-11.7	1.28613
Chi.A-11.8	1.13403
Chi.A-11.9	1.2305

## Sheet: Fig_2e_b2v2r_clusterin_index
genotype	B2V2R_CI_max-CI_-iso
EGFP	0.4905
EGFP.1	0.2735
EGFP.2	0.201
EGFP.3	0.5661
EGFP.4	0.2866
EGFP.5	0.3138
EGFP.6	0.2285
EGFP.7	0.2981
EGFP.8	0.2249
barr2	3.9054
barr2.1	10.9264
barr2.2	6.5641
barr2.3	3.424
barr2.4	3.1427
barr2.5	2.8404
barr2.6	5.8994
barr2.7	4.9302
barr2.8	0.9046
barr2.9	1.4888
barr2.10	2.0526
v-arr	0.4095
v-arr.1	0.2011
v-arr.2	0.2227
v-arr.3	0.238
v-arr.4	0.1235
v-arr.5	0.0953
v-arr.6	0.2624
v-arr.7	0.2229
v-arr.8	0.1238
Chi.A-9	0.2919
Chi.A-9.1	1.1617
Chi.A-9.2	0.1866
Chi.A-9.3	0.5041
Chi.A-9.4	0.2129
Chi.A-9.5	0.3
Chi.A-9.6	0.355
Chi.A-9.7	0.1597
Chi.A-9.8	0.1936
Chi.A-9.9	0.657
Chi.A-9.10	0.5917
Chi.A-10	0.2165
Chi.A-10.1	0.5913
Chi.A-10.2	0.5045
Chi.A-10.3	0.8617
Chi.A-10.4	0.4535
Chi.A-10.5	0.5551
Chi.A-10.6	0.1815
Chi.A-10.7	0.3638
Chi.A-10.8	0.2128
Chi.A-10.9	0.1841
Chi.A-11	0.2716
Chi.A-11.1	0.1938
Chi.A-11.2	0.2738
Chi.A-11.3	0.4687
Chi.A-11.4	0.9124
Chi.A-11.5	0.6196
Chi.A-11.6	0.3176
Chi.A-11.7	0.3951
Chi.A-11.8	0.2804
Chi.A-11.9	0.32
