# Supplementary material for: Discrete GPCR-triggered endocytic modes enable β-arrestins to flexibly regulate cell signaling
Source: eLife journal article supplement (doi:10.7554/elife.81563), 2022-10-17
Supplement: supp [file Figure3_figure supplement 1_source data.xlsx]

## Sheet: Ext_Fig_3a_scFv30_nanobit
[V2Rpp], M	βarr2			βarr2-ΔCT			βarr2-CLB			βarr2-CLB,ΔCT
5e-11	1.0371	1	1	0.94503	1	1	1.13506	1	1	0.968659	1	1
5e-10	0.95747	0.812363	0.830736	0.986374	0.949567	1.00506	1.05592	1.04295	0.975143	1.0722	1.07647	0.9602
5e-09	0.971383	0.876271	0.844395	1.02636	0.987865	0.977612	1.08602	1.07297	0.971475	1.07434	1.02884	0.977049
5e-08	1.05361	1.06529	1.06492	1.15519	1.27623	1.2712	1.0995	1.35002	1.08329	1.15825	1.63329	1.13479
5e-07	1.47281	2.63779	2.00976	1.96665	2.44814	2.35336	1.48028	2.87777	2.08672	1.96805	2.61077	1.69472
5e-06	4.14722	5.59627	6.07454	3.41676	3.02246	3.39175	4.57204	8.39866	6.18289	3.28607	3.19476	2.4143
5e-05	12.7524	9.29412	8.49221	4.15206	4.13812	4.18176	16.5334	14.165	11.4363	3.80301	4.38262	2.67268

## Sheet: Ext_Fig_3b_parental
mApple			βarr2			βarr2-CLB,ΔCT
54	59	57	68	65	70	10	12	2

## Sheet: Ext_Fig_3c_barr1_internal
	EGFP	EGFP	EGFP	EGFP	barr1	barr1	barr1	barr1	barr1-CLB	barr1-CLB	barr1-CLB	barr1-CLB
% b2ar internalization	11.8	0	4.3	3.4	44.9	50.4	37.2	45.5	14.3	11	11.7	15.5

## Sheet: Ext_Fig_3d_barr1_c-edge
EGFP					βarr1				βarr1-ΔCT			βarr1-ΔSL,ΔCT			βarr1-CLB				βarr1-CLB,ΔCT				βarr1-CLB,ΔSL,ΔCT
9	8	15	18	13	77	75	66	72	35	45	51	37	39	46	51	50	44	47	-6	-2	1	-5	-5	-6	-6

## Sheet: Ext_Fig_3e_clb_pt_mut_internal
	EGFP	EGFP	EGFP	barr2-EGFP	barr2-EGFP	barr2-EGFP	barr2-CLB,I208L,I215L-EGFP	barr2-CLB,I208L,I215L-EGFP	barr2-CLB,I208L,I215L-EGFP	barr2-D205S-EGFP	barr2-D205S-EGFP	barr2-D205S-EGFP	barr2-N216P-EGFP	barr2-N216P-EGFP	barr2-N216P-EGFP	barr2-N218T-EGFP	barr2-N218T-EGFP	barr2-N218T-EGFP	barr2-H220A-EGFP	barr2-H220A-EGFP	barr2-H220A-EGFP	barr2-L208I,L215I-EGFP	barr2-L208I,L215I-EGFP	barr2-L208I,L215I-EGFP
%_b2ar_internalization	13.2352	21.9032	17.2218	56.3752	62.806	53.8338	23.8233	18.1939	26.247	46.8038	50.5678	46.9439	50.4907	59.054	52.7724	13.988	15.5456	6.37335	53.0971	60.348	57.8061	54.9855	59.7212	57.6849
