# Supplementary material for: Discrete GPCR-triggered endocytic modes enable β-arrestins to flexibly regulate cell signaling
Source: eLife journal article supplement (doi:10.7554/elife.81563), 2022-10-17
Supplement: supp [file Figure3_source_data.xlsx]

## Sheet: Fig_3f_b2ar_cluster_kinetics
seconds	EGFP	EGFP	EGFP	EGFP	EGFP	EGFP	EGFP	EGFP	EGFP	βarr2	βarr2	βarr2	βarr2	βarr2	βarr2	βarr2	βarr2	βarr2	βarr2	βarr2	βarr2-_CT	βarr2-_CT	βarr2-_CT	βarr2-_CT	βarr2-_CT	βarr2-_CT	βarr2-_CT	βarr2-_CT	βarr2-_CT	βarr2-_CT	βarr2-_CT	βarr2-CLB	βarr2-CLB	βarr2-CLB	βarr2-CLB	βarr2-CLB	βarr2-CLB	βarr2-CLB	βarr2-CLB	βarr2-CLB	βarr2-CLB	βarr2-CLB	βarr2-_CT,CLB	βarr2-_CT,CLB	βarr2-_CT,CLB	βarr2-_CT,CLB	βarr2-_CT,CLB	βarr2-_CT,CLB	βarr2-_CT,CLB
0	0.0966	0.0435	0.0409	-0.052	0.0657	-0.0347	-0.0332	0.0071	-0.0306	-0.0551	-0.0151	-0.0655	-0.0615	-0.0377	-0.0117	0.0599	0.1098	-0.0449	-0.0383	0.2349	-0.0477	0.1016	0.0265	0.0936	-0.0023	-0.0538	0.0082	0.0637	-0.04	-0.0175	-0.114	0.0969	-0.0359	-0.0312	0.0108	0.0096	0.0622	-0.0639	0.2346	-0.0098	-0.0116	-0.0407	0.036	0.0986	-0.0968	0.1942	-0.0454	-0.0866	0.0092
2	-0.0174	0.0075	0.0549	-0.008	-0.0473	-0.0257	0.0648	0.0451	-0.0266	-0.0111	-0.0621	0.0565	0.0265	0.0643	-0.0997	-0.0381	0.0088	-0.0139	-0.0393	0.1339	0.0643	-0.0794	0.0055	-0.0674	0.0187	-0.0258	-0.0288	-0.0703	0.045	0.0445	0.046	0.0419	-0.0079	-0.0232	-0.0422	-0.0524	0.0472	0.0671	0.0066	-0.0288	0.0104	0.0373	0.101	-0.0164	0.0592	0.0312	-0.0284	-0.0046	0.0122
4	0.0566	0.0325	0.0389	-0.179	0.0557	-0.0117	0.0548	-0.0239	0.0654	0.0799	0.0449	0.0835	-0.0255	-0.0027	0.0693	0.0399	-0.0102	-0.0059	-0.0783	0.0469	-0.0517	0.1956	0.0185	0.1256	-0.0543	0.0842	0.0002	-0.0323	0.009	0.0695	0.037	0.0219	0.0681	0.0068	0.0208	0.1166	-0.0138	-0.0839	-0.0194	0.0082	0.0304	-0.0387	-0.034	-0.0304	0.0102	0.0012	0.0166	0.0444	-0.0068
6	0.0886	0.0185	-0.0321	0.026	-0.0863	-0.0237	-0.0222	0.0051	0.0524	0.0659	0.0259	-0.0695	0.0755	-0.0897	0.0463	-0.0121	-0.0242	0.0921	0.1167	0.1679	-0.0557	-0.0974	-0.0215	-0.0564	0.0517	0.0992	-0.0148	0.0567	0.068	-0.0785	-0.023	-0.0221	-0.0529	-0.0002	0.0198	-0.0634	-0.0008	0.0831	-0.0214	-0.0168	-0.0066	0.0753	-0.057	0.0406	-0.0328	-0.0468	-0.0294	0.0314	0.0422
8	0.0376	0.0275	0.0189	0.143	0.0147	-0.0157	0.0368	-0.0089	-0.0036	-0.0381	0.1219	-0.0495	0.0335	-0.0097	0.0873	-0.0491	0.0028	-0.0689	-0.0013	-0.2201	-0.0007	-0.0104	0.0805	0.0106	0.0157	-0.0548	-0.0138	0.0167	0.051	0.0205	0.058	0.0759	0.0241	0.0518	0.0598	-0.0364	-0.0258	0.0501	-0.0724	-0.0078	-0.0356	-0.0317	-0.014	0.0576	-0.0818	-0.1158	0.0276	0.0324	0.0142
10	-0.0204	-0.0255	-0.0481	-0.022	-0.0033	0.0163	-0.0342	-0.0099	-0.0616	-0.0621	0.0259	-0.0325	-0.0345	-0.0117	-0.1257	-0.0051	0.0058	0.1091	0.0857	-0.0801	0.0403	0.0246	-0.0385	-0.0924	-0.0313	0.0572	0.0262	-0.0243	-0.045	0.0055	0.094	-0.0981	0.0751	0.0048	0.0128	-0.0894	-0.0468	-0.0389	-0.0964	0.0152	-0.0416	0.0513	-0.049	-0.0104	0.0172	-0.0648	0.0516	-0.0806	-0.0258
12	-0.0354	-0.0565	-0.0081	0.031	-0.0423	-0.0087	-0.0362	-0.0299	0.0334	0.0219	-0.0091	0.0125	0.0575	0.0623	-0.0237	-0.0651	-0.0652	0.0851	0.1147	-0.0671	0.0133	-0.1274	-0.0375	-0.0384	0.0537	-0.0268	0.0522	-0.0503	-0.044	-0.0235	0.013	0.0209	-0.0719	0.0938	0.0708	0.0156	-0.0818	-0.0389	0.0176	0.0012	0.0024	0.0543	-0.007	-0.0414	0.1022	0.0552	0.0686	-0.0046	-0.1108
14	-0.0384	-0.0285	-0.0361	0.078	0.0297	0.0683	0.0278	0.0281	-0.0356	0.0629	-0.0631	-0.0415	-0.0105	-0.0197	0.0783	-0.0381	0.0808	-0.0579	-0.0313	-0.1041	0.0273	-0.0584	0.0755	0.0106	-0.0173	-0.0288	-0.0578	0.0437	1.11e-16	0.0705	1.11e-16	-0.0721	0.0111	-0.0502	-0.1222	-0.0154	0.0412	-0.0079	-0.0754	0.0032	0.0614	-0.0937	0.08	-0.0314	0.0012	-0.0858	0.0186	-0.0466	-0.0148
16	-0.0684	0.0385	-0.0161	-0.042	0.0197	0.0223	-0.1342	0.0231	0.0274	-0.0731	-0.0071	0.0745	-0.0635	-0.0627	0.0163	0.0769	-0.0742	-0.0759	-0.0473	0.0679	0.0333	-0.0324	-0.1225	0.0366	-0.0483	0.0382	0.0262	0.0527	0.005	-0.0715	-0.066	-0.0791	0.0151	0.0938	0.0308	0.0396	0.0412	0.0371	0.0456	0.0322	0.0744	0.0273	-0.082	-0.0284	-0.0148	-0.0228	-0.0844	-0.1146	0.0402
18	-0.0994	-0.0575	-0.0131	0.025	-0.0063	0.0133	0.0758	-0.0359	-0.0206	0.0089	-0.0621	0.0315	0.0025	0.1073	-0.0367	0.0309	-0.0342	-0.0189	-0.0813	-0.1801	-0.0227	0.0836	0.0135	-0.0224	0.0137	-0.0888	0.0022	-0.0563	-0.049	-0.0195	-0.045	0.0139	-0.0249	-0.1462	-0.0612	0.0756	-0.0228	-0.0039	-0.0194	0.0032	-0.0836	-0.0407	0.026	-0.0384	0.0362	0.0542	0.0046	0.2294	0.0402
20	-0.1964	-0.0865	0.0929	-0.091	0.2457	-0.0867	-0.0122	0.0161	0.0044	-0.0761	-0.0691	-0.0095	-0.0365	-0.0687	-0.0037	0.0109	0.0298	0.0251	-0.0173	-0.2611	0.0393	-0.0674	0.0435	-0.1164	0.1047	-0.0108	0.1282	0.0897	-0.055	0.0075	0.007	-0.0581	0.0341	-0.0362	-0.1482	-0.0194	0.0022	-0.1389	-0.1194	0.0372	-0.0536	0.0963	0.056	-0.0404	-0.0068	0.0382	-0.1054	-0.1006	0.0682
22	0.0916	0.1085	-0.1291	-0.034	0.1127	-0.0657	0.0168	0.0351	-0.0496	0.0539	-0.1401	0.0155	0.1275	0.0593	-0.0727	-0.0091	-0.0532	-0.0499	-0.0173	-0.1551	0.0163	-0.1114	0.0305	-0.0014	0.0917	-0.0028	0.0902	0.0447	0.092	-0.0695	-0.001	0.0049	-0.1269	0.0018	-0.1772	-0.0334	0.0572	-0.0539	-0.0114	0.0402	-0.0326	-0.1017	-0.026	-0.0394	-0.0168	-0.0398	0.0116	-0.1596	0.1082
24	-0.0674	-0.0305	-0.0511	0.036	-0.0203	-0.0057	-0.0092	0.0331	-0.0126	-0.0441	-0.1101	0.0465	0.0035	0.0163	-0.0427	0.0439	-0.0692	-0.0089	-0.0583	-0.0191	-0.0347	-0.1294	0.0095	-0.0054	0.0327	0.0212	-0.0508	-0.0703	-0.101	-0.0905	-0.105	0.2929	0.0311	0.1128	-0.0892	-0.1094	-0.0488	-0.0999	-0.1404	0.0352	0.0004	-0.0937	0.017	-0.0624	-0.0178	-0.0968	0.0006	-0.0876	0.0092
26	-0.2074	0.0195	-0.0811	-0.032	0.0017	-0.0207	-0.1302	0.0291	0.0324	-0.0331	-0.0961	0.0155	-0.0215	-0.0417	0.0803	-0.0231	-0.1022	-0.0259	-0.0143	-0.1191	0.0583	0.0186	0.0955	-0.0794	-0.0643	0.0812	-0.1038	-0.0173	-0.048	-0.1395	-0.03	0.0399	0.0521	-0.0532	-0.0562	0.1196	0.0152	-0.1639	-0.2314	-0.0918	-0.1126	-0.1537	-0.019	-0.0324	-0.0428	-0.1798	-0.1004	-0.1086	0.1072
28	-0.0444	-0.0505	-0.0011	-0.031	0.0337	-0.1067	0.0298	0.0891	-0.1516	-0.0381	-0.1941	0.0195	0.0055	-0.0757	-0.0607	0.0249	0.0668	0.0171	0.0347	-0.1841	-0.0327	-0.1874	-0.0375	0.0426	-0.0353	0.0202	0.0002	-0.0073	0.011	-0.2105	0.088	0.0759	-0.0079	-0.1322	-0.1772	0.0056	0.0372	-0.0569	-0.1304	-0.0998	-0.1016	-0.1117	-0.043	-0.1304	0.0022	-0.0318	-0.0764	-0.0646	-0.0348
30	-0.0654	-0.1155	0.0769	0.052	-0.1493	-0.0887	-0.0622	-0.0519	-0.0406	-0.0531	-0.1551	0.0505	-0.0615	-0.0717	-0.0717	-0.0911	-0.0212	-0.0219	-0.0253	-0.1141	-0.0467	0.0226	0.0355	-0.1044	-0.0523	0.0182	0.0152	-0.0153	-0.166	-0.1035	0.033	-0.3901	-0.0029	0.0218	0.0978	0.0696	-0.0638	-0.0549	-0.1974	-0.1088	-0.1386	-0.1357	-0.068	-0.0184	-0.0188	-0.1198	-0.0314	-0.0686	-0.0688
32	-0.0724	-0.0725	-0.0911	-0.056	-0.0153	-0.0717	-0.0872	-0.0179	-0.0206	-0.0521	-0.1121	0.1105	-0.0505	-0.0157	-0.1427	-0.0411	0.1718	-0.0069	-0.0743	-0.1381	-0.1047	-0.1444	-0.0635	0.1036	0.0437	-0.0808	0.1312	-0.0203	0.039	-0.0805	0.043	0.0029	-0.0159	0.0328	0.0938	0.0806	-0.1578	0.1221	0.0376	-0.1418	-0.0356	-0.0267	0.056	0.0646	-0.1398	0.0522	-0.0294	0.0924	0.0912
34	0.0036	-0.0895	-0.0681	-0.058	-0.0903	-0.1007	0.0888	0.0381	-0.0206	0.4509	0.1489	0.0865	0.0095	-0.0167	-0.0157	0.0219	0.1848	0.0891	-0.1653	-0.0121	0.2073	0.0366	-0.0875	0.0396	-0.0633	0.1412	0.1622	0.0867	-0.108	0.0315	-0.059	0.0259	0.0521	0.0898	0.0028	0.0126	-0.0138	-0.1499	0.1016	-0.0548	-0.2126	-0.0287	0.06	0.0076	-0.0638	0.0972	0.1436	-0.1546	-0.0748
36	-0.0814	-0.0925	-0.1091	-0.017	-0.0253	-0.0227	-0.0372	-0.0569	-0.0336	0.1789	0.2679	0.3455	0.1035	0.0813	0.1383	0.1889	0.4818	0.1981	-0.2693	0.1579	0.1043	-0.1174	-0.0885	0.1706	-0.0303	0.0232	0.0772	0.1387	-0.055	-0.0515	0.037	-0.0151	0.0701	0.0678	-0.0272	-0.0034	-0.1508	0.0601	-0.0344	-0.0498	-0.0876	0.0333	0.028	0.0856	0.0662	0.1042	0.0316	-0.1436	0.0182
38	-0.0474	-0.0385	-0.0641	-0.046	0.1117	-0.0147	0.0778	0.0511	-0.0176	0.4389	0.4969	0.3395	0.1795	0.2703	0.4803	0.3229	0.6538	0.3381	0.1517	-0.0131	0.1523	-0.0364	-0.0005	0.0526	-0.0103	0.1082	0.2042	0.0277	0.08	-0.0825	-0.015	0.0139	0.0231	0.0588	0.0008	-0.0944	0.0132	-0.0319	0.2296	-0.0268	-0.0506	-0.0377	0.086	-0.0764	0.0312	0.1332	-0.0264	-0.1146	-0.0018
40	-0.0574	-0.0825	-0.0221	-0.012	0.0197	0.0193	-0.0992	-0.0979	-0.0396	0.3909	0.7189	0.4345	0.2475	0.2873	0.7803	0.5329	0.7658	0.6061	0.2717	0.1379	0.1163	-0.1394	0.0035	0.2416	-0.0453	0.0042	0.2352	0.2867	0.054	-0.0155	0.107	0.0219	-0.0479	0.0818	0.0238	0.0606	-0.1088	-0.0189	0.1036	-0.1138	-0.0816	0.1033	0.063	0.0896	-0.0938	0.3022	-0.0294	-0.1226	0.0372
42	-0.0444	0.0565	-0.1241	-0.129	-0.0263	0.0783	0.1008	-0.0519	-0.0816	0.4529	0.7719	0.5285	0.4465	0.2113	0.8503	0.5459	0.9248	0.7071	0.3267	0.0929	0.2403	-0.0074	0.1015	0.0706	0.0547	0.3642	0.1802	0.3947	0.097	-0.0205	0.236	0.0459	-0.0169	0.0648	-0.0802	-0.0994	0.0512	0.0001	0.1066	-0.0278	-0.0756	0.0363	0.02	0.0186	-0.0508	0.0702	0.0356	-0.0216	0.0012
44	-0.0934	0.0775	-0.1141	-0.048	0.0547	0.1083	-0.0462	-0.0449	-0.0176	0.4629	0.7639	0.7615	0.4675	0.3263	1.0883	0.7739	0.9808	0.8971	0.4517	0.1729	0.4653	0.0036	0.0015	-0.0214	0.1137	0.1002	0.2472	0.2937	0.081	-0.0965	0.104	-0.0321	-0.0619	0.0358	0.1528	-0.1024	0.1382	0.0941	0.0356	-0.1188	-0.0906	0.0193	0.076	-0.0284	-0.0838	0.3032	-0.0094	-0.0186	0.0312
46	-0.1314	-0.0855	0.0659	0.095	0.0507	-0.0117	-0.0942	0.0391	-0.0536	0.5929	0.5279	0.8675	0.4775	0.3563	1.1173	0.9749	1.0938	0.8241	0.6567	0.3169	0.4603	-0.1574	0.0615	0.0856	0.0417	-0.0128	0.3742	0.3317	0.194	0.0265	0.083	0.1189	0.0151	0.0748	-0.0002	0.0466	0.0282	0.1271	0.0156	-0.0708	-0.1946	-0.0517	-0.071	0.0806	-0.0168	0.0312	0.1296	-0.0536	0.0442
48	-0.0584	0.0225	0.1709	0.012	-0.0883	0.0393	-0.0792	-0.0739	-0.0286	0.4709	0.9379	0.8065	0.5865	0.5093	1.1773	1.0179	1.2588	1.1651	0.6867	0.3819	0.3223	-0.0374	0.0175	0.0956	0.1107	0.0442	0.3082	0.4907	0.381	0.0815	0.144	0.1199	0.0591	0.1618	-0.0042	-0.0104	0.0552	-0.0799	-0.0424	-0.0838	-0.1616	0.0983	-0.079	0.1056	-0.0508	0.1722	0.0286	-0.0216	0.0242
50	-0.0734	-0.0725	-0.0841	-0.035	0.0447	0.1143	-0.0212	0.0241	-0.0546	0.6019	1.0369	0.8515	0.5855	0.6383	1.3583	1.2069	1.2898	1.0761	0.8967	0.4669	0.3683	-0.0044	0.1115	0.0586	0.1357	0.1332	0.3482	0.5367	0.199	0.2805	0.415	0.0049	-0.0669	0.0618	-0.1302	0.1116	0.1412	0.0931	0.1046	-0.0878	-0.1816	-0.0187	0.004	0.0726	-0.1168	0.1062	-0.1024	-0.1626	0.0392
52	-0.1874	-0.0015	-0.2051	-0.15	0.0347	0.0393	-0.1122	-0.0579	-0.0416	0.8349	1.0979	0.8615	0.7435	0.7033	1.3803	1.0439	1.2698	1.2961	0.8877	0.4199	0.4453	-0.1194	0.1605	0.0596	0.0467	0.0752	0.2892	0.5467	0.332	0.0565	0.296	-0.0271	0.0001	0.1588	-0.1902	-0.0624	0.2062	0.2141	0.0946	-0.0228	-0.1396	-0.0167	-0.016	0.0076	-0.0838	0.2422	-0.0194	-0.0746	0.0342
54	-0.1044	0.0665	-0.1991	-0.089	0.0457	-0.0227	-0.0762	-0.0169	0.0674	0.6789	1.2049	1.0005	0.7405	0.7773	1.2313	1.2519	1.2898	1.4221	0.9317	0.5089	0.6243	-0.0634	0.1785	0.2016	0.3047	0.1682	0.3542	0.4677	0.225	0.1195	0.288	0.1579	0.0671	0.1088	-0.2302	0.2136	0.1952	-0.0899	0.1706	-0.0078	-0.1126	0.0573	-0.014	0.0506	0.0292	-0.0078	-0.0514	0.0124	0.1982
56	-0.0574	0.0215	-0.0661	-0.116	0.2047	-0.1007	-0.1182	0.0211	-0.0636	0.7769	0.9969	1.1185	0.7225	0.8673	1.3533	1.2359	1.3258	1.4401	0.9357	0.5779	0.6743	-0.0614	0.1935	0.2136	0.1197	0.1542	0.4522	0.5097	0.366	0.3445	0.246	0.1549	-0.0129	0.0728	-0.2212	0.1186	0.1982	0.2251	0.1436	-0.0308	-0.0956	-0.0737	-0.026	0.0416	-0.0338	0.0402	0.0236	-0.0806	0.0892
58	-0.0794	-0.0735	-0.0811	-0.046	0.0867	0.0503	-0.0122	0.0331	-0.0296	0.9519	1.1479	1.3085	0.7695	0.9823	1.4263	1.4349	1.3888	1.4831	0.9917	0.4459	0.8043	-0.0574	0.2885	0.1576	0.2027	0.1922	0.5522	0.5247	0.328	0.2455	0.41	0.0529	-0.0199	0.0928	0.0618	0.1236	0.2242	0.1291	0.4446	0.0232	-0.0506	0.0853	0.003	0.0306	0.0352	0.2262	-0.0904	-0.1146	0.1032
60	-0.0244	0.0255	0.0339	0.063	0.0027	0.0263	-0.0552	0.0261	0.0064	0.8279	1.0219	1.3425	0.7345	1.0233	1.4423	1.4499	1.5018	1.3971	1.0647	0.5599	0.7073	0.0276	0.2835	0.2266	0.2247	0.4232	0.5002	0.6247	0.295	0.2345	0.435	0.1759	-0.0249	0.1418	-0.1472	0.0696	0.1802	0.1771	0.2916	-0.0058	-0.0056	-0.1477	0.023	0.0546	0.1392	0.1052	0.0716	-0.1476	0.1652
62	-0.0804	-0.0315	0.0879	0.005	0.0877	-0.0317	-0.0512	0.0081	0.0384	0.7679	1.3419	1.1605	0.8795	1.1433	1.4173	1.4069	1.4448	1.4911	1.0237	0.5179	0.6993	0.0476	0.3395	0.1936	0.1027	0.2602	0.4772	0.7737	0.306	0.3695	0.246	0.2589	0.0501	0.1748	-0.1492	0.0796	0.3042	0.1781	0.3486	-0.0078	-0.0126	-0.0437	-0.055	-0.0124	-0.0258	0.0432	-0.0404	-0.0916	0.1262
64	-0.0404	0.0045	-0.0711	0.019	0.0897	-0.0627	-0.0842	0.0411	-0.0056	0.8279	1.2269	1.3655	0.8505	1.1123	1.4713	1.4349	1.5178	1.6871	1.0457	0.7649	0.7483	0.1866	0.2205	0.1886	0.1167	0.2822	0.5402	0.6017	0.42	0.4785	0.571	0.3779	0.0221	0.2068	-0.1432	0.1676	0.2352	0.2141	0.4636	0.0072	-0.1186	0.0033	0.066	0.0096	0.1352	-0.0198	0.0116	-0.0886	0.1922
66	0.0076	-0.0225	0.1399	-0.005	0.0227	0.0153	-0.0492	0.0571	0.0194	0.8559	1.4009	1.3495	0.8455	1.1873	1.5803	1.6039	1.4718	1.5721	1.0227	0.7159	0.7883	-0.0194	0.1555	0.1996	0.2657	0.2332	0.5142	0.7217	0.451	0.4165	0.571	0.5029	0.0411	0.2128	-0.1632	0.2076	0.3732	0.1591	0.5766	-0.0158	-0.0286	0.0713	0.026	0.0386	-0.0308	-0.0838	-0.0394	-0.0806	0.1322
68	-0.0884	0.0285	-0.0401	-0.032	0.0567	-0.0137	-0.0392	0.0481	0.0554	0.8579	1.2859	1.4645	0.9965	1.3533	1.5763	1.5119	1.5808	1.7541	1.1287	0.6959	0.6513	0.1436	0.2745	0.0886	0.2577	0.3622	0.4612	0.6757	0.309	0.6015	0.619	0.2959	0.0031	0.1598	-0.1272	0.2006	0.4152	0.5361	0.5926	0.0162	-0.0226	-0.0327	0.051	0.0386	0.0002	-0.0398	-0.0704	0.0514	0.1542
70	-0.1014	-0.0745	-0.0041	-0.01	0.1117	0.0263	-0.1262	0.0251	-0.0696	0.7429	1.1009	1.4635	1.0375	1.2673	1.5343	1.6249	1.5838	1.7141	1.1627	0.6959	0.8533	0.1146	0.2665	0.2466	0.2047	0.3202	0.5792	0.7287	0.363	0.5555	0.439	0.3259	0.0671	0.1768	-0.1382	0.4276	0.5392	0.2931	0.6266	0.0492	0.0024	0.0393	0.07	-0.0114	-0.0218	-0.0028	-0.0004	-0.0976	0.0602
72	0.2046	0.0455	0.2739	-0.018	0.1107	0.0063	-0.1052	0.0011	-0.0736	0.6919	1.3719	1.4965	1.0295	1.3443	1.5593	1.7169	1.6288	1.7221	1.1927	0.6909	0.8853	0.0076	0.1905	0.2636	0.3247	0.4062	0.5742	0.6847	0.419	0.6735	0.364	0.2749	0.0141	0.2698	-0.0332	0.2816	0.4362	0.3501	0.4856	0.0532	0.1004	0.1023	0.025	-0.0894	0.0852	0.0462	0.0166	0.0994	0.0622
74	-0.0354	-0.0085	0.1489	0.036	0.1107	-0.0127	-0.0292	0.0201	-0.0286	0.6099	1.2389	1.5095	1.0355	1.3793	1.6403	1.7769	1.6888	1.7651	1.2247	0.6249	0.7933	0.0016	0.2285	0.3156	0.3007	0.4712	0.6182	0.7517	0.401	0.7065	0.395	0.3289	0.0981	0.3068	-0.0742	0.4506	0.7022	0.4501	0.6886	0.0882	0.0484	-0.0167	0.06	-0.0664	-0.0278	0.0542	-0.0534	0.0254	0.1362
76	0.1576	-0.0265	-0.0591	0.021	0.0767	-0.0057	-0.0692	-0.0789	0.0344	0.7299	1.2259	1.5095	1.0005	1.4973	1.6103	1.7759	1.6768	1.8311	1.1437	0.6609	0.7513	0.0386	0.3235	0.1936	0.2317	0.4292	0.8562	0.7337	0.413	0.6825	0.453	0.2669	0.1171	0.4258	-0.0932	0.4576	0.5812	0.5401	0.6396	0.0972	-0.0596	-0.1147	0.065	-0.0054	0.0012	0.0892	-0.0384	-0.2006	0.1192
78	0.0006	0.0275	-0.1381	0.017	-0.0623	-0.0157	-0.0292	-0.0369	0.0064	0.5749	1.3419	1.3965	1.0385	1.4033	1.6263	1.8309	1.7568	1.8441	1.1317	0.6699	0.9043	0.0656	0.2745	0.2796	0.2737	0.4992	0.7562	0.8667	0.472	0.7165	0.438	0.1739	0.1141	0.3718	0.1388	0.4156	0.6322	0.3411	0.6016	0.0732	0.0674	-0.1347	0.027	-0.0674	-0.0458	0.1062	-0.0424	-0.1276	0.0962
80	-0.0204	-0.0095	-0.1031	0.087	0.1877	-0.0667	-0.0082	0.0211	-0.0416	0.5959	1.1579	1.4185	1.0285	1.5213	1.7203	1.8309	1.7128	1.8211	1.1077	0.6669	0.7253	0.1336	0.3125	0.2936	0.1617	0.4572	0.6202	0.9667	0.506	0.7175	0.616	0.4249	0.1931	0.2718	-0.1002	0.2576	0.7472	0.2881	0.5686	0.1062	0.0214	-0.0397	0.026	-0.0294	-0.0608	0.0202	-0.0324	-0.0156	0.1202
82	0.0656	-0.0755	0.0789	0.103	-0.0273	-0.0357	-0.1082	-0.0459	0.0574	0.6689	1.3029	1.2895	1.0165	1.4483	1.7313	1.9289	1.7738	2.0041	1.2227	0.6849	0.7593	-0.0394	0.2435	0.4186	0.3057	0.5052	0.7562	0.8807	0.629	0.7275	0.516	0.4039	0.0991	0.2188	0.1018	0.4836	0.6502	0.5231	0.5116	0.1502	-0.0246	0.0083	-0.07	-0.0534	-0.0938	-0.0538	-0.0154	-0.0476	0.0792
84	-0.1134	-0.0535	0.0199	-0.02	-0.0473	-0.0267	-0.0862	-0.0229	-0.0936	0.7299	1.4489	1.5555	1.0805	1.6483	1.8703	1.9149	1.6728	1.9411	1.0967	0.7929	0.8723	0.0536	0.2815	0.4036	0.2847	0.5322	0.7092	0.8937	0.528	0.8285	0.475	0.3709	-0.0009	0.4468	0.0638	0.4336	0.9632	0.4291	0.7286	0.1862	0.0854	0.0543	-0.028	-0.0074	-0.0588	0.1532	-0.0714	-0.1686	0.0272
86	-0.0474	0.0325	0.2489	0.06	0.0687	-0.0097	-0.1132	-0.0779	-0.0196	0.6979	1.3009	1.4365	1.1855	1.6543	1.7503	1.8589	1.7038	1.9431	1.0727	0.9229	0.7893	0.0306	0.3665	0.4076	0.3487	0.4662	0.7052	0.8227	0.409	1.0405	0.497	0.4129	0.0781	0.2608	0.0528	0.4186	0.9052	0.5231	0.6366	0.0342	-0.0786	-0.0147	-0.065	-0.0074	0.0812	0.0432	0.0576	-0.1266	0.1012
88	-0.0034	-0.0915	-0.0671	0.011	0.1717	0.0003	-0.0492	-0.0179	-0.0526	0.6649	1.3989	1.4715	1.1945	1.8553	1.8473	1.9389	1.6108	2.0441	1.1647	0.8209	1.0103	0.1276	0.4965	0.5126	0.4477	0.5102	0.8092	0.8427	0.371	0.9515	0.568	0.4119	0.1281	0.4958	0.1438	0.3416	0.9922	0.7721	0.6246	0.1652	0.0444	0.1973	0.004	0.0106	0.0072	0.1342	-0.0194	-0.0566	0.0512
90	-0.0264	-0.0085	0.0449	-0.089	-0.0163	0.0133	0.0128	-0.0379	0.0534	0.6739	1.3039	1.5285	1.1995	1.8503	1.8143	1.8939	1.7228	2.1391	1.0847	0.8109	1.0613	0.0986	0.3725	0.4406	0.3447	0.5212	0.7382	0.8917	0.4	1.0115	0.577	0.5259	0.0911	0.3298	0.2788	0.4556	0.8252	0.6151	0.5986	0.2382	0.0654	0.0203	-0.042	0.0266	-0.1428	0.0742	0.0336	-0.1996	-0.0528
92	-0.0394	-0.1165	-0.0041	-0.089	-0.0043	0.0993	0.0278	-0.0509	0.0364	0.6849	1.3199	1.5585	1.1325	1.8543	1.7963	1.9579	1.6338	2.1841	1.1347	0.7449	1.1463	0.2566	0.5355	0.4866	0.2147	0.4772	0.7942	0.8887	0.457	0.9215	0.647	0.3899	0.1851	0.4718	0.1928	0.3756	0.9222	0.4851	0.6326	0.2572	0.0104	0.1193	-0.071	-0.0034	-0.1248	0.1052	0.0106	-0.1786	-0.0248
94	-0.0384	-0.0865	0.0209	-0.031	0.1977	0.0613	-0.0312	-0.0309	-0.0186	0.7829	1.3619	1.5635	1.1325	1.8383	1.6513	1.9029	1.5868	2.2281	1.2307	0.6859	1.1683	0.2966	0.4935	0.5526	0.2987	0.4812	0.8312	0.9567	0.423	1.0215	0.457	0.3999	0.2191	0.4268	0.1428	0.5086	0.8212	0.5901	0.6476	0.2572	0.0314	0.1123	-0.04	-0.0664	-0.0278	0.1552	-0.0154	-0.1146	0.0672
96	-0.0194	-0.0675	-0.0251	0.054	0.1117	0.0883	0.0528	-0.0139	-0.0086	0.7339	1.2259	1.5245	1.0905	1.9273	1.6973	2.0679	1.7168	2.2781	1.2007	0.6729	1.2503	0.1806	0.3945	0.6316	0.4567	0.4002	0.7972	0.9847	0.528	1.0425	0.647	0.4089	0.1801	0.3998	0.2318	0.6086	0.9862	0.6581	0.8216	0.3272	0.0194	0.1223	-0.041	-0.0504	-0.1088	0.2072	-0.0384	-0.1786	0.0122
98	-0.0164	-0.0535	0.1649	-0.111	0.0867	0.0013	-0.0472	-0.0829	-0.1086	0.8509	1.2849	1.5075	1.1265	1.9923	1.8353	2.0159	1.7688	2.2921	1.1387	0.6759	1.1423	0.4666	0.5535	0.4056	0.4417	0.4612	0.6882	0.8487	0.452	1.1185	0.594	0.3959	0.1281	0.3728	0.1928	0.7506	1.0472	0.5941	0.6786	0.3582	0.0334	0.1353	0.115	-0.0744	-0.1348	0.1802	-0.1084	-0.1716	-0.0678
100	0.0696	-0.0315	-0.1291	-0.072	0.1407	-0.0707	-0.1012	-0.0759	-0.0246	0.8659	1.5059	1.6545	1.1505	1.9903	1.7793	2.0129	1.7408	2.3081	1.1957	0.7369	1.2673	0.2576	0.4045	0.4596	0.5397	0.3702	0.6412	1.0187	0.504	1.1615	0.624	0.4469	0.1221	0.4168	0.2258	0.6156	1.1382	0.4981	0.6846	0.4092	0.1234	0.1543	0.041	-0.0784	-0.0048	0.0962	-0.0534	-0.0136	0.0852
102	-0.1564	-0.0615	-0.0141	-0.066	0.0867	-0.0277	-0.0192	0.0171	0.0084	0.9979	1.4249	1.5495	1.1325	1.9953	1.9023	1.9379	1.8748	2.2841	1.1727	0.7379	1.2403	0.3836	0.5345	0.5136	0.5297	0.3572	0.7832	1.0777	0.466	1.1265	0.472	0.3899	0.2351	0.5608	0.3938	0.6406	1.1322	0.6901	0.7586	0.4722	0.0724	0.1013	-0.044	-0.0434	0.0722	-0.1278	-0.0864	-0.1416	0.0432
104	0.0876	0.1155	0.2749	-0.106	0.0597	-0.0697	0.0398	-0.0119	-0.0856	0.9639	1.4499	1.4695	1.1575	1.8543	1.7873	1.9739	1.9248	2.4861	1.2087	0.6849	1.3093	0.3206	0.5445	0.5906	0.6637	0.2842	0.7562	1.0497	0.474	1.0955	0.535	0.2299	0.1821	0.4458	0.2418	0.7836	1.1532	0.5961	0.8156	0.3712	0.2294	0.1703	-0.004	-0.0854	-0.0828	0.0282	-0.0314	-0.1286	0.0392
106	-0.0894	-0.0375	0.0959	0.031	0.1067	-0.0787	0.0038	-0.0399	-0.0556	0.9369	1.3679	1.4585	1.1565	1.9653	1.7973	1.9489	1.7078	2.3231	1.2327	0.7629	1.3163	0.4016	0.3425	0.5226	0.4027	0.3472	0.9582	0.9967	0.502	1.1635	0.57	0.2159	0.1811	0.5068	0.3578	0.6936	1.4922	0.5711	0.6986	0.3422	0.0244	0.0703	0.074	-0.0444	-0.1128	0.0172	-0.1184	-0.1596	0.0482
108	0.0866	-0.0185	0.1399	0.058	0.0547	-0.0587	-0.0692	-0.0319	-0.0326	1.0299	1.2829	1.5925	1.1685	2.0883	1.9013	2.0559	1.8018	2.4021	1.2187	0.7669	1.2643	0.4856	0.4645	0.4136	0.3027	0.4482	0.7602	1.0277	0.549	1.0775	0.566	0.1859	0.0691	0.5258	0.3428	1.0036	1.1322	0.7041	0.6886	0.3432	0.0984	0.1903	0.069	-0.1004	0.0182	0.0112	-0.0824	-0.0996	0.0122
110	-0.0584	-0.0055	0.0979	-0.011	0.0417	0.0463	-0.0082	-0.0839	-0.0966	0.9899	1.3239	1.6865	1.2495	2.0313	1.9443	2.1179	1.9408	2.5891	1.2897	0.7719	1.3813	0.3756	0.6735	0.4606	0.4497	0.4062	0.8092	1.0557	0.489	1.1005	0.54	0.3069	0.1521	0.5398	0.4138	0.8686	1.1732	0.6921	0.6976	0.4192	0.1944	0.0913	-0.038	-0.0454	-0.1608	0.1022	-0.1064	-0.0226	0.0352
112	-0.0014	-0.0385	0.0129	-0.032	0.0347	-0.0447	0.0208	-0.1279	-0.0386	1.1319	1.2699	1.7285	1.2365	2.1423	1.8233	2.0359	1.8308	2.5541	1.2377	0.7549	1.2823	0.3396	0.4955	0.4116	0.4777	0.4662	0.8882	1.0357	0.608	1.0295	0.5	0.1869	0.0481	0.5338	0.4018	0.8336	1.0762	0.8551	0.7466	0.5192	0.1714	0.1773	0.034	-0.1424	-0.0608	0.0722	-0.0254	0.0544	-0.0358
114	0.0336	0.0305	-0.0281	-0.088	0.0437	0.0623	0.0388	-0.0429	-0.0316	1.2109	1.5669	1.6055	1.1765	2.3153	1.8403	2.1659	1.7608	2.7871	1.2617	0.6499	1.1373	0.2246	0.5695	0.4836	0.3697	0.4052	0.8042	1.0107	0.557	1.1065	0.549	0.3359	-0.0519	0.5568	0.2828	0.6986	1.1182	0.6541	0.7686	0.5152	0.0644	0.1743	0.069	-0.0914	-0.0758	-0.0798	0.0896	-0.2376	-0.0128
116	0.0826	-0.0095	0.0349	-0.151	0.0867	0.0113	-0.0702	-0.0689	0.0004	1.0469	1.3099	1.7485	1.2105	2.1623	1.8073	2.0669	1.7998	2.7411	1.1697	0.8089	1.2273	0.2496	0.8365	0.4656	0.4947	0.4822	0.9562	1.0427	0.566	1.1325	0.555	0.4049	0.1151	0.4888	0.4008	0.7296	1.1002	0.8321	0.7036	0.5292	0.1554	0.2053	0.004	-0.0404	-0.0188	0.0372	-0.0674	0.0344	0.1162
118	0.0166	-0.0405	0.0539	-0.079	0.2047	-0.0207	0.0608	-0.0089	0.0404	1.0129	1.2449	1.8105	1.1835	2.2213	1.7913	2.1939	1.8228	2.6071	1.2777	0.8299	1.2883	0.2606	0.9085	0.6366	0.5587	0.4892	0.8082	0.9927	0.526	0.9885	0.598	0.4439	0.1131	0.5668	0.5438	0.8356	1.3162	0.5491	0.6566	0.5582	0.0184	0.1603	0.01	0.0066	-0.1478	-0.0448	-0.0854	-0.1536	0.0142
120	-0.0504	-0.1185	0.0509	-0.108	0.1477	-0.0237	0.0388	-0.1099	-0.0046	1.0249	1.1119	1.7075	1.2175	2.1713	1.7033	2.2519	1.8958	2.6021	1.2057	0.7399	1.3333	0.3546	0.6835	0.5906	0.5837	0.5942	0.7852	1.0627	0.506	0.9725	0.618	0.6669	0.1701	0.6898	0.6458	0.6216	1.2762	0.6821	0.5926	0.6252	0.1624	0.1243	0.014	-0.0804	0.0192	-0.0288	-0.1294	-0.2186	0.0652
122	-0.0704	-0.0775	-0.0211	-0.041	0.0717	-0.0517	-0.0022	-0.0499	-0.0576	1.1729	0.9909	1.7325	1.2735	2.5273	1.7023	2.0879	1.8648	2.8791	1.0927	0.7169	1.3203	0.3286	0.8115	0.5976	0.6897	0.4892	0.8702	0.9297	0.628	1.1065	0.541	0.5669	0.2261	0.6468	0.6998	0.6906	1.3852	0.6411	0.7206	0.6242	0.0994	0.1523	0.034	-0.0444	-0.0148	0.0882	-0.0154	-0.1816	0.0752
124	0.0186	0.0025	0.0399	-0.167	0.1047	-0.0827	-0.0472	0.0181	0.0394	1.0499	1.1889	1.6285	1.2465	2.4483	1.7263	2.1889	1.9788	3.0661	1.1677	0.8009	1.2423	0.3566	0.7155	0.4956	0.6507	0.4952	0.8442	0.8417	0.704	0.9995	0.505	0.5079	0.1651	0.5278	0.5198	0.6286	1.3722	0.7281	0.6226	0.7132	0.1454	0.2033	0.016	-0.0224	0.0612	0.0952	-0.0224	-0.1576	0.0572
126	-0.0014	-0.0485	0.2049	-0.084	0.1907	0.0433	-0.0532	-0.0549	0.0024	1.0019	0.9799	1.6905	1.3455	2.5173	1.7003	2.1859	1.9168	2.9431	1.1357	0.7349	1.2453	0.4636	0.7225	0.6286	0.5697	0.5392	0.8832	0.9227	0.654	0.9815	0.614	0.5279	0.1161	0.4298	0.5628	0.7306	1.2492	0.8081	0.6396	0.6502	0.1554	0.2563	-0.035	0.0466	0.0802	0.0292	-0.1124	0.0054	0.0402
128	-0.1214	-0.1025	-0.0751	-0.082	0.0407	-0.0507	-0.0452	-0.0799	0.0504	1.0519	1.0669	1.7435	1.3865	2.5203	1.6383	2.1699	2.0418	3.2131	1.0727	0.7999	1.2493	0.3586	0.7505	0.6166	0.6877	0.5272	0.8662	0.9337	0.646	1.0245	0.702	0.7449	0.2331	0.5628	0.6008	0.8456	1.1812	0.7861	0.6836	0.6572	0.1454	0.3083	0.014	0.0726	0.0012	0.0022	-0.0854	-0.0126	0.0542
130	0.0046	-0.0215	0.1909	-0.153	0.1397	0.0193	-0.0052	-0.0779	0.0084	1.1759	1.3749	1.7875	1.4045	2.4983	1.6813	2.3489	2.0428	3.2371	1.3087	0.8259	1.1973	0.3336	0.6785	0.5316	0.8797	0.5912	1.0032	0.9387	0.723	0.9585	0.633	0.6629	0.3111	0.5788	0.6948	0.6596	1.3212	0.7831	0.6496	0.4662	0.0944	0.2783	0.039	-0.0074	0.0232	0.0072	-0.0414	-0.1716	0.0082
132	0.0016	-0.0955	0.0309	-0.026	-0.0023	-0.1597	-0.1142	0.0281	-0.0656	1.2559	1.0839	1.7155	1.4105	2.5863	1.6673	2.4559	2.0318	3.3661	1.2507	0.8189	1.2883	0.4156	0.7095	0.5136	0.6467	0.5012	0.9362	0.9037	0.702	1.0405	0.658	0.7549	0.1791	0.5798	0.5808	0.7606	1.1862	0.7091	0.7406	0.7082	0.1014	0.3043	0.018	0.0186	-0.0098	-0.0788	-0.0064	-0.0976	0.0242
134	0.0456	-0.0615	-0.0031	-0.111	0.1507	-0.0017	-0.0492	-0.0069	-0.0856	1.0709	1.0829	1.7255	1.2955	2.7103	1.7483	2.2669	1.8668	3.3031	1.3187	0.7029	1.2033	0.3476	0.7365	0.5246	0.6597	0.6082	0.9202	1.0077	0.752	1.1655	0.631	0.6369	0.0971	0.5038	0.6368	0.7336	1.2402	0.7921	0.7816	0.6192	0.2344	0.1663	-0.001	0.0646	-0.1018	0.0312	-0.0064	-0.1006	0.2112
136	-0.0394	-0.1085	-0.0381	-0.104	0.0827	-0.0917	-0.0492	-0.0789	-0.0336	1.1449	1.0939	1.7805	1.3715	2.6173	1.6843	2.2659	1.9598	3.3201	1.3467	0.7729	1.2373	0.2436	0.6975	0.6136	0.7067	0.4962	0.8902	0.9317	0.793	1.2385	0.533	0.6039	0.2341	0.5308	0.6898	0.6166	1.1132	0.8471	0.7176	0.5562	0.2194	0.2803	0.077	0.0366	0.0262	-0.0798	-0.0944	-0.0386	0.0832
138	0.0706	-0.0975	0.0139	-0.043	0.0517	-0.0247	-0.0122	-0.0499	0.0074	1.2309	1.1919	1.8235	1.3755	2.5723	1.6393	2.1679	1.9568	3.0671	1.2107	0.8219	1.1623	0.2816	0.6735	0.6796	0.7237	0.7542	0.9452	0.9987	0.77	0.9865	0.61	0.6819	0.1171	0.5958	0.5728	0.6416	1.2202	1.1471	0.8256	0.5962	0.3404	0.2743	0.046	-0.0684	-0.0408	-0.0398	0.0136	-0.1546	0.1422
140	-0.0024	-0.0335	0.0509	-0.136	0.1077	-0.0237	-0.0292	-0.0499	0.0454	1.2239	1.3199	1.9545	1.4065	2.5823	1.5943	2.2379	2.1248	3.1971	1.2147	0.7729	1.1763	0.3456	0.7695	0.6346	0.7017	0.7032	0.9332	1.0237	0.72	1.0145	0.653	0.5379	0.0951	0.4258	0.6268	0.8476	1.2282	0.9761	0.7646	0.5312	0.1784	0.2313	0.028	-0.0064	-0.0448	0.0462	-0.1114	-0.0986	-0.0468
142	0.0546	0.0185	-0.0861	-0.045	0.0737	0.0613	-0.1142	-0.0529	-0.0086	1.2489	1.2859	2.1205	1.4535	2.6483	1.5653	2.1689	2.1548	3.0121	1.1957	0.9129	1.2963	0.2566	0.6395	0.5506	0.4657	0.7172	0.9962	0.9307	0.67	1.0915	0.555	0.6719	0.2981	0.6228	0.6788	0.9736	1.3112	0.8121	0.7626	0.5402	0.1894	0.2033	0.011	-0.0234	-0.0968	-0.0928	-0.0924	-0.1236	0.0602
144	-0.0024	-0.0205	0.0699	0.065	0.0327	0.0273	-0.0642	-0.0079	-0.0236	1.0729	1.5319	2.0255	1.4525	2.8093	1.5373	2.5619	2.1488	3.0531	1.1447	0.7719	1.2183	0.2636	0.6845	0.5406	0.4767	0.6562	0.9602	0.9177	0.798	1.1555	0.615	0.6409	0.2431	0.4378	0.6938	0.9116	1.4682	1.0161	0.8456	0.6122	0.2804	0.2683	0.038	0.0396	-0.0618	-0.1838	-0.0834	-0.2126	-0.0208
146	0.1026	-0.1025	0.0059	-0.059	0.2297	-0.1277	-0.0332	-0.0179	0.0284	1.0959	1.5069	1.9755	1.4395	2.9023	1.5193	2.3809	1.9778	3.0951	1.2117	0.7909	1.2213	0.3216	0.6075	0.6166	0.3597	0.6562	0.8172	0.9527	0.869	1.0985	0.762	0.4649	0.1881	0.6158	0.6698	0.8866	1.2182	0.8551	0.9846	0.5762	0.2444	0.2703	-0.077	-0.0694	-0.0078	-0.1648	-0.1274	-0.1346	-0.0358
148	-0.0174	0.1025	0.0659	0.039	0.0767	0.1043	-0.0252	0.0621	0.1714	1.0649	1.1999	2.0355	1.6145	2.7663	1.6033	2.2749	1.7348	3.2421	1.1457	0.8209	1.3373	0.2486	0.6095	0.5866	0.6287	0.6442	0.8062	1.0017	0.728	0.9925	0.63	0.6369	0.1931	0.4888	0.8008	0.8546	1.2602	0.8151	0.9476	0.5792	0.2634	0.2023	-0.017	-0.0624	-0.0088	-0.0628	-0.0514	-0.0976	-0.0758
150	0.0666	0.0565	0.0919	0.038	0.1397	0.1243	-0.1152	-0.0499	0.0404	1.2629	1.4989	1.9275	1.6425	2.7173	1.5243	2.3309	1.8598	3.0651	1.1987	0.9039	1.2973	0.2606	0.7665	0.8506	0.5927	0.6572	0.7942	1.0787	0.803	1.0365	0.653	0.5439	0.2501	0.5968	0.9138	0.8106	1.4792	0.6741	0.8156	0.5972	0.1214	0.1793	-0.085	-0.0964	0.0232	-0.0788	0.0076	-0.1856	0.0362
152	0.0296	-0.0455	0.0729	-0.278	0.3247	-0.0197	-0.1552	-0.0509	-0.0046	1.1429	1.4689	1.9495	1.6865	2.6543	1.5343	2.3349	1.6978	3.0341	1.2987	0.9349	1.3013	0.2126	0.6765	0.6696	0.4747	0.6412	0.8792	1.0597	0.814	1.0135	0.658	0.5599	0.1571	0.5348	0.8258	0.9686	1.3672	0.9561	0.8446	0.6332	0.1664	0.2303	-0.103	-0.1294	-0.0448	-0.1498	-0.1194	-0.1186	-0.0868
154	-0.1234	0.0315	0.0909	-0.161	-0.0143	-0.0137	-0.0732	-0.0129	0.0534	1.2409	1.8039	1.8865	1.6855	2.6903	1.5313	2.4099	1.7328	2.9451	1.2317	0.8339	1.2863	0.3486	0.5995	0.6306	0.5177	0.4822	0.8882	1.0937	0.702	1.0035	0.811	0.5379	0.1911	0.6408	0.9338	0.8256	1.3012	0.6841	0.8376	0.5552	0.3074	0.3513	-0.072	-0.0354	-0.0458	-0.0678	-0.0864	-0.1326	-0.0408
156	-0.0944	0.0415	-0.0421	-0.16	0.1017	0.0443	-0.0952	-0.0669	0.0034	1.0479	1.6559	2.1005	1.5755	2.7213	1.5523	2.4959	1.7608	2.7401	1.1887	0.9419	1.3493	0.2036	0.6555	0.5646	0.3747	0.5252	0.7952	1.1237	0.735	1.0055	0.864	0.6509	0.2481	0.5868	0.8368	0.7276	1.2662	1.1921	0.8786	0.4962	0.4144	0.2813	-0.031	-0.0474	0.0612	-0.0568	-0.0834	-0.2146	0.1132
158	-0.1934	-0.0555	-0.0471	-0.087	0.0817	-0.0167	-0.1712	-0.0219	-0.0546	1.1449	1.8459	2.1095	1.5225	3.0503	1.5583	2.2989	1.8538	3.2731	1.2047	1.0519	1.3833	0.2956	0.5995	0.6196	0.5797	0.4992	0.8672	1.0497	0.782	1.2885	0.881	0.6639	0.2821	0.6628	0.8198	0.8066	1.2312	0.7361	0.9736	0.5442	0.3814	0.3153	0.013	-0.0834	-0.0488	-0.0468	-0.0474	-0.1806	0.0182
160	-0.0374	0.0385	0.0539	0.056	0.0487	-0.0297	-0.1202	-0.0759	0.0024	1.0339	3.0579	1.9855	1.6075	2.8953	1.5623	2.4669	1.9078	3.2301	1.2167	1.0199	1.2673	0.3416	0.7105	0.7166	0.6347	0.5862	0.9282	1.1217	0.731	1.1325	0.79	0.4239	0.3791	0.5918	0.9018	0.7536	1.2952	0.9381	0.9156	0.6712	0.3954	0.2083	0.094	-0.0384	-0.0498	0.1002	-0.0284	-0.0346	-0.0318
162	-0.0024	-0.0405	0.0059	-0.127	0.1747	0.0093	-0.0562	-0.0679	0.0754	0.9999	1.4549	2.0175	1.5825	3.1073	1.5163	2.6279	1.7808	2.8391	1.1687	1.0419	1.2823	0.2736	0.6895	0.6086	0.6957	0.5072	0.8752	1.1077	0.678	1.0615	0.698	0.5049	0.2731	0.5768	0.8218	0.8796	1.1472	0.8051	1.0896	0.6142	0.3684	0.3563	-0.013	-0.0534	0.0142	0.0782	-0.0174	-0.1016	0.0952
164	-0.0554	-0.1225	0.0339	-0.064	0.0757	-0.0027	-0.0972	-0.0669	-0.0796	1.2129	2.1429	1.9205	1.6355	3.0093	1.5693	2.6759	1.9028	3.0601	1.2667	1.1679	1.5133	0.1266	0.6125	0.7196	0.7767	0.5802	0.9362	1.0407	0.749	1.0495	0.696	0.5269	0.3201	0.7168	0.9068	0.8666	1.1142	0.7281	1.0476	0.6332	0.4044	0.2203	-0.132	-0.0764	-0.0028	-0.0338	-0.0364	-0.1826	0.0552
166	0.0286	-0.0785	0.0949	-0.074	0.1987	0.0003	-0.1062	-0.0289	-0.0346	0.9359	1.7859	1.9195	1.6455	2.7093	1.5613	2.5969	1.8668	3.0231	1.2057	1.1789	1.2773	0.2046	0.6165	0.5876	0.6717	0.4992	0.7642	1.0507	0.729	1.0335	0.824	0.7599	0.3341	0.7138	0.8738	0.6896	1.1982	0.6691	0.9316	0.6572	0.3564	0.2513	-0.067	-0.0974	0.0592	-0.0998	-0.0484	-0.1536	0.0442
168	0.0196	-0.1045	-0.0531	-0.018	0.1227	0.0983	-0.0592	0.0341	0.0144	0.8549	1.5659	1.9375	1.6325	2.7393	1.5413	2.6139	2.0278	2.9991	1.1847	1.0779	1.1603	0.3476	0.7335	0.6776	0.7267	0.6872	0.8462	1.1167	0.724	1.1095	0.863	0.6239	0.3621	0.6048	1.0208	0.7646	1.2102	0.5611	1.0286	0.7192	0.4174	0.4083	-0.107	-0.1234	0.0202	-0.0568	0.0546	-0.0956	-0.0158
170	-0.0264	-0.0865	0.1459	-0.092	0.0387	-0.0277	0.0628	-0.0619	-0.0446	1.0009	1.3999	2.0775	1.8105	2.7393	1.5333	2.7609	2.0498	2.9511	1.2097	1.2559	1.2333	0.2246	0.7835	0.6486	0.4397	0.4802	0.8672	1.0667	0.836	1.1045	0.821	0.7369	0.3021	0.5058	0.8858	0.9426	1.3112	0.5471	0.9736	0.6582	0.4004	0.3633	-0.032	-0.0034	-0.0488	0.0412	0.0186	-0.1386	0.0682
172	-0.0724	0.0555	0.0889	-0.076	0.0737	-0.0297	-0.0092	0.0081	-0.0256	1.0249	2.8929	1.9065	1.5235	2.7293	1.5153	2.7219	1.8218	3.0231	1.2217	1.3389	1.2723	0.3256	0.7135	0.6466	0.6117	0.5572	0.8962	1.1897	0.836	1.0755	0.661	0.4879	0.3381	0.7558	0.9488	0.9446	1.3842	0.5941	1.0196	0.6152	0.3554	0.2733	-0.119	-0.0904	-0.0708	-0.0058	-0.0714	-0.1826	-0.0458
174	-0.1274	-0.0375	0.2239	-0.16	-0.0423	0.0403	-0.1062	-0.0859	-0.0466	0.8389	2.5979	1.9495	1.5545	2.7923	1.5613	2.8489	1.7558	2.9921	1.1877	1.4289	1.2773	0.3076	0.7895	0.6236	0.6447	0.4802	0.9072	1.1177	0.754	1.1565	0.944	0.5249	0.3051	0.7048	1.0088	0.8556	1.3502	0.7301	0.9386	0.6812	0.3934	0.2823	-0.075	-0.0474	-0.0158	-0.0198	-0.1224	-0.1026	0.0492
176	-0.1924	-0.0395	-0.0901	-0.048	0.0387	-0.0397	-0.1702	-0.1089	0.0534	0.9429	2.1519	1.9795	1.7005	2.8793	1.5683	2.7379	1.8118	3.0341	1.2197	1.3359	1.3743	0.2966	0.7915	0.7536	0.7377	0.5032	0.8432	1.2287	0.779	1.0425	1.095	0.4929	0.2761	0.5418	0.9438	0.9416	1.3082	0.6551	0.8366	0.7402	0.3844	0.1963	-0.061	-0.0784	-0.0858	0.0062	-0.1174	-0.0806	0.0562
178	-0.1154	-0.0675	0.2159	-0.068	0.0517	0.0393	-0.1542	-0.0689	-0.0256	1.0429	2.6479	2.0245	1.5885	3.1143	1.5473	2.6299	2.0558	3.2131	1.1807	1.3829	1.3733	0.2966	0.8115	0.6866	0.8267	0.5512	0.9112	1.2327	0.795	1.1545	0.932	0.6289	0.2271	0.7458	0.9098	0.8446	1.2572	0.8991	0.9276	0.6472	0.3204	0.3163	0.032	-0.0254	-0.1618	0.2372	0.0096	-0.0736	0.0052
180	-0.1164	0.0245	0.1419	-0.019	0.0847	0.0363	-0.1922	-0.1009	-0.0156	0.9899	4.2309	1.9395	1.6195	2.8213	1.6083	2.8239	1.8338	3.0581	1.2687	1.3419	1.1383	0.2736	0.7435	0.4166	0.6727	0.3592	0.9602	1.2267	0.996	0.9635	0.798	0.5129	0.1841	0.6378	0.9448	0.8396	1.3112	0.7591	0.9246	0.7562	0.3554	0.2863	0.057	-0.0294	-0.0528	0.0712	-0.0954	-0.1116	0.0212
182	-0.0574	0.0255	0.0019	0.085	0.1757	-0.0367	-0.0912	-0.0029	-0.0146	1.0029	3.5419	1.9765	1.6505	2.7833	1.5723	2.8249	1.8168	3.1151	1.2417	1.3389	1.3393	0.2946	0.8045	0.3696	0.6787	0.4762	1.0212	1.2907	0.779	0.9775	0.785	0.5969	0.2821	0.6548	0.9068	0.9176	1.3152	0.8961	0.9026	0.6422	0.4174	0.2493	-0.016	-0.0614	-0.1268	-0.1178	-0.1564	0.0054	-0.0428
184	0.0646	-0.0915	-0.0681	0.029	0.0327	0.0233	-0.1562	-0.0349	-0.0896	0.9539	3.5629	1.9045	1.6265	2.7743	1.5293	3.2399	2.0078	3.2521	1.3187	1.4089	1.1223	0.4066	0.7205	0.5826	0.5847	0.5302	1.0902	1.2167	0.718	0.9065	0.838	0.4149	0.1651	0.6628	1.0578	1.0796	1.3062	0.7941	0.8506	0.7742	0.4534	0.3113	0.042	-0.0314	0.0172	0.2272	-0.0694	-0.1206	-0.0198
186	0.0106	-0.1065	0.1169	-0.17	0.1607	-0.0137	-0.1522	-0.0229	-0.0176	0.9649	4.5939	1.9535	1.7275	2.7263	1.4533	3.2719	1.8668	3.3011	1.1937	1.2529	1.2983	0.3616	0.7665	0.4476	0.6697	0.6502	1.0282	1.2677	0.814	1.0475	0.75	0.4449	0.3171	0.6678	1.0178	1.1286	1.2922	1.0071	0.8696	0.8162	0.4284	0.3963	0.069	-0.0744	-0.0728	0.0762	-0.1194	-0.1886	0.0652
188	0.0436	-0.0475	0.0919	-0.035	0.2517	-0.0357	-0.1332	-0.0259	-0.0536	0.9089	4.6129	2.0515	1.6585	2.8453	1.5653	3.1239	2.0658	3.2821	1.1177	1.2859	1.2473	0.4296	0.7805	0.5196	1.0367	0.6762	1.0112	1.2497	0.783	1.0385	0.847	0.5289	0.3571	0.6358	1.0238	1.0026	1.3332	0.9451	0.8566	0.7042	0.4724	0.4253	0.031	-0.0214	-0.0578	0.0372	-0.0864	-0.1166	-0.0078
190	-0.1174	-0.0245	0.0869	-0.074	0.1517	-0.0317	-0.1312	-0.0939	0.0984	1.0069	4.4069	1.9535	1.5755	2.4673	1.5773	2.7219	2.0888	3.4571	1.2077	1.2839	1.1003	0.4266	0.9325	0.5216	0.6697	0.5922	1.0042	1.1927	0.874	1.1055	0.781	0.5969	0.2411	0.6388	0.9578	0.9656	1.3442	0.8321	0.9786	0.6062	0.4874	0.4153	-0.017	-0.1504	-0.1228	0.0252	-0.1764	-0.0656	-0.0758
192	-0.0594	-0.0475	0.0919	-0.11	0.1077	-0.1037	-0.1172	-0.0749	0.0334	1.1459	4.1909	2.1285	1.5525	2.4003	1.5803	3.2949	2.0598	3.7891	1.1657	1.3079	1.2413	0.3276	0.8715	0.5206	0.9207	0.9512	1.0132	1.2037	0.859	0.9375	0.896	0.4009	0.1821	0.6488	1.0348	1.0136	1.4182	0.7911	0.8366	0.5382	0.4214	0.4573	0.108	-0.0904	-0.0078	-0.0478	-0.0974	-0.1266	-0.1238
194	-0.0004	-0.1055	0.1009	0.08	0.0767	0.0023	-0.0142	-0.0939	0.0414	1.0229	3.4639	2.0505	1.5195	2.6123	1.6383	3.0699	2.1448	3.7421	1.2397	1.3959	1.1533	0.3186	0.8915	0.4996	0.7217	1.1632	1.0982	1.0957	0.921	0.9625	0.723	0.4769	0.4161	0.5608	1.0658	0.8846	1.4442	0.8461	0.8376	0.6702	0.4484	0.3183	-0.045	-0.1364	0.1022	0.0472	-0.0224	-0.1076	-0.0098
196	-0.1174	-0.0535	0.1219	-0.059	0.1027	-0.0657	-0.0272	-0.0289	-0.0316	1.1149	3.9499	2.0185	1.5255	2.5473	1.7013	3.6449	2.0368	3.9491	1.2367	1.2759	1.4283	0.3046	0.8875	0.5026	0.8077	0.8392	1.1022	1.0387	0.937	0.9405	0.86	0.7449	0.2871	0.7628	1.1548	0.9266	1.3642	0.8811	0.7626	0.6462	0.3834	0.3693	0.065	-0.0734	-0.0138	-0.1448	-0.0644	-0.2096	-0.0598
198	-0.0694	-0.1085	0.1809	-0.107	0.2037	-0.0847	-0.0302	-0.0729	-0.0356	1.1329	3.5259	1.9125	1.6855	2.4033	1.7243	3.3469	1.9428	3.8991	1.2207	1.3659	1.1503	0.4076	0.8485	0.5796	1.1087	0.7332	1.0492	1.0287	0.835	1.0005	0.677	0.7519	0.2131	0.6288	1.1158	1.0376	1.3072	0.8521	0.8686	0.6362	0.4914	0.2493	0.032	-0.0994	-0.0228	-0.0878	-0.0754	0.0414	-0.0548
200	-0.1524	-0.0955	0.1759	-0.084	0.0837	-0.0347	0.0098	-0.0649	0.0024	1.1969	3.1779	2.0335	1.4885	2.5123	1.7273	2.8659	1.8858	3.8461	1.2187	1.2319	1.1003	0.3516	0.6875	0.5746	0.7077	0.7432	1.1332	1.0707	0.916	0.9835	0.788	0.5379	0.2171	0.7138	0.9898	0.9836	1.3042	0.9751	0.8636	0.5792	0.4674	0.2613	-0.005	-0.1074	-0.0688	-0.1328	-0.1584	-0.2216	-0.1158
202	-0.0404	-0.0395	0.0659	-0.143	0.2107	0.0133	-0.0482	-0.0879	0.0044	1.1469	3.3849	1.9035	1.4605	2.2923	1.7333	3.3929	1.8948	3.1101	1.2737	1.3579	1.2373	0.2576	0.7695	0.6376	0.7347	0.9652	1.0922	1.0637	1.016	1.0415	0.683	0.7539	0.2891	0.7438	1.1218	0.9646	1.5112	0.9851	0.9946	0.6902	0.3724	0.3333	0.1	-0.0454	0.0202	-0.0548	-0.0934	-0.0116	0.0902
204	-0.1844	-0.1155	-0.0081	-0.052	0.2137	0.0093	-0.0922	0.0081	-0.0066	1.1289	4.0259	1.9105	1.5105	2.1553	1.7703	3.7349	1.9668	3.3441	1.2257	1.4089	1.0133	0.2236	0.8565	0.7156	0.9777	0.8732	1.1672	1.0697	0.96	0.9165	0.682	0.4239	0.3581	0.7168	1.1688	0.8196	1.4682	0.9211	1.0126	0.6822	0.5174	0.3023	0.125	-0.0164	-0.0928	-0.0898	-0.0704	-0.1006	-0.0018
206	-0.0394	-0.0345	0.0409	-0.017	0.1207	-0.0047	-0.0592	-0.0279	-0.0206	1.0469	4.9199	2.0975	1.6205	2.2483	1.7533	3.1179	1.9808	3.1311	1.2547	1.2959	1.1563	0.3536	0.6585	0.6106	0.8507	0.8532	1.1312	1.1337	0.971	0.8685	0.631	0.5719	0.2311	0.6568	1.1418	0.8266	1.3632	0.7941	0.8466	0.5242	0.6354	0.2963	0.017	-0.1084	-0.1688	-0.0498	-0.0274	-0.0056	0.0422
208	-0.0984	-0.0295	0.0369	-0.078	0.1547	-0.0647	-0.0422	-0.0919	-0.0086	1.0129	4.5899	1.9865	1.4895	2.2353	1.7953	2.3539	2.0248	3.1191	1.3637	1.3669	1.2043	0.3336	0.7215	0.6236	0.7797	1.1082	1.0712	1.0907	0.885	0.9715	0.687	0.6199	0.2591	0.7938	1.1158	0.9896	1.4072	0.9031	0.9966	0.5822	0.5414	0.3923	0.117	-0.0194	-0.1368	-0.0048	-0.0214	-0.1256	0.1072
210	-0.1694	-0.0125	0.0349	-0.03	0.2507	-0.0287	-0.0532	-0.0879	0.0134	0.9799	4.5439	1.9675	1.5035	2.2423	1.6253	2.8129	2.0028	3.2991	1.3767	1.3069	1.0973	0.3846	0.7075	0.6136	0.9557	1.1412	1.2152	1.1187	0.927	0.9405	0.695	0.5209	0.2031	0.7338	1.1108	0.7896	1.4492	1.0711	0.8306	0.5892	0.5274	0.4103	0.064	-0.0284	0.0102	0.0872	-0.0694	-0.1096	0.0462
212	-0.1744	-0.0425	0.2199	-0.028	0.0857	-0.0447	0.0378	-0.0389	0.0314	1.1889	3.2559	2.0125	1.5865	2.4333	1.6723	2.9999	2.1188	3.0111	1.3737	1.2419	1.1653	0.5436	0.6525	0.6106	1.0187	1.2532	1.1802	1.0097	0.983	0.8515	0.698	0.5489	0.2951	0.6298	1.0008	0.7746	1.4752	1.3161	0.6926	0.6272	0.3884	0.4083	-0.042	-0.0274	-0.0688	-0.0638	-0.1014	-0.1966	0.0422
214	-0.0864	-0.0875	0.3199	0.006	0.1027	-0.0277	-0.0332	-0.0799	0.0034	1.1359	3.9129	2.0125	1.4405	2.3183	1.7003	3.5069	2.3368	3.1301	1.3227	1.2629	1.1763	0.4516	0.6895	0.6336	0.8577	1.2412	1.2052	1.0637	0.922	0.8545	0.583	0.3909	0.2981	0.6658	0.9738	0.7926	1.4542	1.0531	0.8976	0.6592	0.4564	0.4433	0.051	-0.0164	-0.0808	-0.0648	-0.0644	-0.1546	0.0502
216	-0.0914	-0.0725	0.1039	0.03	0.1587	-0.0427	-0.0572	-0.0089	0.0654	1.2319	3.7899	2.0345	1.4615	2.3253	1.7603	2.9439	2.0378	2.9451	1.3287	1.2909	1.1133	0.3456	0.4995	0.4806	0.9517	1.4292	1.0862	0.9627	0.927	1.0815	0.602	0.5649	0.2251	0.6478	0.9518	0.8216	1.6132	1.0171	0.7146	0.6212	0.5434	0.3033	0.002	-0.0684	-0.0738	0.0402	-0.0654	-0.0856	0.1262
218	-0.1294	-0.0565	0.1829	-0.029	0.0207	-0.1087	-0.0532	-0.0709	0.0464	1.1949	2.6979	2.0925	1.4805	2.2373	1.6833	2.2819	2.8518	3.0781	1.3307	1.1399	1.0883	0.2506	0.6945	0.4936	0.9097	1.2732	1.0802	1.0107	0.928	0.9915	0.776	0.5359	0.2861	0.6548	1.0228	1.0226	1.7152	1.0481	0.7986	0.6602	0.4704	0.3423	0.027	0.0286	-0.0588	-0.0348	-0.0274	-0.1226	0.0382
220	-0.1574	-0.0635	0.1069	-0.121	-0.0093	-0.0127	-0.0742	-0.0679	0.0344	1.2999	4.0039	2.2615	1.4185	2.1523	1.7333	2.6679	2.1778	3.0441	1.2757	1.3219	1.2403	0.3266	0.5135	0.5886	1.0167	1.5252	1.5242	1.0287	1.004	1.1305	0.765	0.6789	0.2971	0.7098	1.1068	0.7156	1.5972	1.0071	0.8126	0.5602	0.4534	0.2283	0.01	-0.0594	-0.1318	-0.0098	-0.0294	-0.1936	0.0172
222	-0.1244	-0.0505	-0.0041	-0.13	0.1427	-0.0217	0.0028	-0.0219	-0.0536	1.1799	3.5109	2.1365	1.3535	2.5023	1.8283	2.9749	2.1148	2.9991	1.2707	1.3949	1.1433	0.7726	0.5665	0.5136	1.1537	1.4292	1.3062	1.1307	0.982	1.1895	0.821	0.7019	0.4261	0.7898	1.0158	0.7896	1.5332	1.1491	0.9366	0.7302	0.5784	0.3163	0.038	0.0086	-0.1918	0.0652	-0.0684	-0.1856	-0.0618
224	-0.1454	-0.1195	0.1419	-0.156	0.0747	0.0553	-0.0952	-0.0679	-0.0016	1.6139	3.0249	2.1165	1.4655	2.1493	1.7373	2.8039	3.3848	2.8761	1.2467	1.3539	1.0483	0.7126	0.5565	0.4096	1.0367	0.9792	1.3822	1.0757	1.031	1.1205	0.783	0.5049	0.3081	0.5818	1.0258	0.7786	1.5412	0.9321	0.7636	0.6002	0.5114	0.3913	-0.035	-0.0314	-0.0378	0.1282	-0.1314	-0.1486	-0.0368
226	-0.1244	-0.0655	0.1869	-0.056	0.0797	0.0433	-0.1532	-0.1209	-0.0086	1.2009	3.4619	2.1185	1.4375	2.2143	1.6823	2.9939	3.2618	3.0471	1.3087	1.2979	1.2003	0.4756	0.5705	0.4286	0.8057	1.0442	1.1892	1.0927	0.97	1.0825	0.77	0.5629	0.2111	0.6848	1.1418	0.9006	1.5312	1.0801	0.9066	0.7382	0.4974	0.4183	0.019	-0.0024	-0.0378	-0.0418	-0.0424	-0.2216	0.0202
228	-0.0924	-0.0585	0.0429	-0.018	0.0917	0.0323	-0.0622	-0.1039	-0.0476	1.2519	2.4669	1.9605	1.6535	2.1083	1.7223	3.4989	1.9958	3.0061	1.1777	1.7449	1.3383	0.7696	0.6065	0.4606	0.9277	1.4272	1.3112	1.0787	1.029	0.9735	0.711	0.4719	0.3391	0.6648	1.1078	0.8796	1.5892	1.2771	0.7336	0.7602	0.4544	0.2683	-0.035	0.0256	-0.1158	0.0312	0.0836	-0.1086	-0.0328
230	-0.2544	-0.1075	0.1749	-0.092	0.0527	-0.0137	-0.0832	0.0101	0.0034	1.2459	4.0149	1.9855	1.4335	2.3743	1.8313	3.1809	1.9028	3.0091	1.1667	1.4459	1.2133	0.6946	0.6045	0.5336	0.9047	0.8212	1.2032	1.0497	0.976	0.9885	0.758	0.6619	0.2861	0.6828	1.0508	0.9046	1.3922	1.2331	0.6096	0.6852	0.4544	0.3863	0.185	-0.0844	-0.0568	-0.0718	0.0916	-0.1486	-0.0058
232	-0.0824	-0.1145	0.1139	-0.065	0.0397	0.0473	-0.0712	-0.0719	0.0014	1.1179	3.5959	2.0125	1.3975	2.2363	1.7333	3.3069	2.0968	3.1291	1.2617	1.5269	1.1883	0.6206	0.5805	0.6706	0.9697	0.6542	1.1952	1.1227	0.99	0.9845	0.745	0.8199	0.3541	0.6328	1.0478	0.8746	1.4512	1.1341	0.7006	0.7762	0.4984	0.4633	0.14	-0.0074	-0.0668	0.0452	0.0826	-0.0916	0.0812
234	-0.1724	-0.0925	0.2459	-0.097	0.1307	-0.0117	-0.0602	0.0091	0.0174	1.3239	3.1109	2.1535	1.5085	2.2293	1.8273	3.1329	1.8058	3.1881	1.2517	1.2939	1.3723	0.6976	0.7145	0.4756	0.8507	0.6472	1.3662	1.1147	1.017	0.9945	0.854	0.6889	0.2801	0.5678	0.9358	0.8846	1.5172	1.2161	0.5386	0.8542	0.5164	0.5163	0.157	-0.0114	0.0472	-0.0058	-0.1394	-0.1556	0.1212
236	0.0276	-0.0655	0.1199	-0.257	0.1827	-0.0277	-0.1282	-0.0329	-0.0736	1.2819	3.0139	2.0395	1.5815	2.2603	1.8793	2.5619	1.7858	3.0921	1.2527	1.3689	1.3303	0.8386	0.5745	0.5716	0.8927	0.8312	1.2392	1.1497	0.949	0.8725	0.876	0.9419	0.2491	0.6748	0.9638	0.9466	1.4062	1.1041	0.6606	0.7222	0.5304	0.4013	0.02	-0.0114	-0.0258	0.1362	-0.0564	-0.1936	-0.0828
238	-0.1194	-0.1155	0.0919	0.009	0.0667	0.0143	-0.0602	0.0191	-0.0406	1.3039	3.2689	2.0725	1.4895	2.1693	1.8113	2.4539	1.6988	3.2761	1.2547	1.2509	1.2863	0.8086	0.6455	0.4976	0.8527	0.7872	1.2382	1.0777	0.964	0.9695	0.96	0.5959	0.2731	0.7718	1.0458	0.9506	1.3582	0.9491	0.5616	0.9042	0.5274	0.4383	0.082	-0.0164	-0.1158	-0.0418	-0.0774	-0.2136	0.0832
240	-0.1084	-0.1105	0.2169	-0.152	-0.0003	-0.0807	-0.0342	-0.0609	0.0104	1.1839	2.5539	2.1205	1.4335	2.1413	1.8223	3.0949	1.7248	3.3311	1.3447	1.2989	1.2453	0.7836	0.7405	0.5766	0.7917	0.6882	1.2342	1.2387	0.932	0.8805	0.812	0.5949	0.2241	0.7888	1.0228	0.9166	1.6122	0.7501	0.6306	0.8132	0.5104	0.4843	0.096	-0.0394	-0.0078	0.2002	-0.0914	-0.1306	0.0622
242	-0.1434	-0.0725	-0.0541	-0.129	0.0147	-0.0207	-0.0732	-0.0359	-0.0276	1.0049	3.3459	2.1855	1.4855	2.0733	1.8623	2.5399	1.5338	2.8491	1.2387	1.2759	1.4833	0.7286	0.6905	0.5486	0.9027	0.5792	1.2322	1.1257	1.024	0.9695	0.72	0.4869	0.2311	0.8258	1.0328	1.0236	1.3472	0.9551	0.6736	0.8082	0.5804	0.4153	-0.093	0.1256	-0.0588	-0.0408	-0.1424	-0.2006	0.0742
244	-0.1394	-0.0955	-0.0741	-0.19	0.0467	-0.0447	-0.1012	-0.0739	-0.0536	1.1789	3.2989	2.0535	1.4705	2.0253	1.9723	2.5849	1.6748	2.6811	1.3117	1.2569	1.3983	0.7586	0.6235	0.6356	0.8297	0.4702	1.2912	1.1257	0.96	1.0325	0.635	0.5239	0.2711	0.6358	0.9138	1.0666	1.5722	1.0471	0.5356	0.8412	0.6314	0.4113	0.048	-0.0724	-0.0478	0.0122	-0.0734	-0.1876	0.0072
246	-0.1224	-0.1065	0.1009	-0.048	0.0197	-0.0237	-0.1282	-0.0469	0.0154	1.2289	2.4309	1.9875	1.3045	2.0743	1.9783	2.0849	1.4948	2.9241	1.3307	1.3559	1.3323	0.8936	0.6735	0.4916	0.6277	0.4302	1.2912	1.0837	0.968	1.0035	0.842	0.6329	0.3101	0.9118	1.0048	1.1636	1.3972	0.9221	0.6016	0.7922	0.6044	0.4693	-0.016	-0.0624	-0.1458	-0.0078	-0.0684	-0.0836	-0.0248
248	-0.0614	-0.0845	0.0929	-0.084	-0.0003	-0.1127	-0.1192	0.0031	-0.0446	1.1809	2.0069	2.1515	1.5115	2.0063	1.9603	1.9659	1.3488	2.8301	1.1827	1.2859	1.3023	0.8896	0.6885	0.5596	0.7097	0.3722	1.4102	1.0837	0.86	0.9165	0.974	0.4839	0.2911	0.8858	1.0158	1.1726	1.5272	1.0161	0.7326	0.7602	0.6014	0.4693	0.061	-0.0304	-0.0738	0.0312	0.0206	-0.0976	0.0502
250	-0.1534	-0.1595	0.0089	-0.1	0.1397	-0.0117	-0.1022	-0.0839	-0.0286	1.2189	1.6589	2.0365	1.3925	2.0483	1.9083	1.8929	1.5498	2.7821	1.2617	1.2289	1.2833	0.7716	0.6185	0.6046	0.6377	0.4702	1.3802	1.0727	1.011	0.8095	0.739	0.7199	0.2551	0.7288	1.0158	1.2146	1.4002	1.2021	0.6196	0.8442	0.5064	0.7113	0.084	-0.0654	-0.1078	-0.0528	-0.1504	-0.0366	0.0712
252	-0.1454	-0.1765	0.0209	-0.118	-0.0563	0.0013	-0.0862	-0.0879	-0.0546	1.1379	1.3959	2.1115	1.4235	2.0403	1.7953	1.7629	2.2528	2.9791	1.2337	1.2859	1.1823	1.0756	0.5855	0.5446	0.6317	0.5982	1.7962	1.0467	1.015	0.9425	0.805	0.4449	0.3501	0.7308	0.9808	1.0306	1.3442	1.2861	0.7096	0.7992	0.6294	0.6173	0.114	-0.0644	-0.1138	-0.0648	-0.0254	-0.0506	0.0282
254	-0.0594	-0.0455	0.0219	-0.008	-0.1393	0.0023	-0.1012	-0.0569	-0.0556	1.2019	2.0929	2.0845	1.4375	2.2953	1.7343	1.8159	1.9788	2.8031	1.2897	1.0809	1.3153	1.0676	0.6405	0.6136	0.8737	0.4642	1.4522	1.0187	0.915	0.8545	0.869	0.3909	0.2721	0.7358	0.9748	1.1686	1.4672	1.3501	0.7106	0.7892	0.6524	0.4803	0.079	0.0016	-0.1198	-0.1488	0.0526	-0.1476	0.0842
256	-0.1764	-0.0785	0.1309	-0.063	0.0647	0.1033	-0.0772	-0.0409	0.0754	1.2799	2.0609	2.0595	1.3315	2.0903	1.8473	1.7859	1.9988	3.0771	1.2577	1.1899	1.1833	0.8286	0.6035	0.6446	0.5307	0.5122	1.4052	1.0837	0.835	0.8345	1.005	0.4419	0.1761	0.7258	1.0768	1.0276	1.4252	1.0451	0.7456	0.7762	0.6074	0.3133	0.094	-0.0674	-0.0928	-0.1178	-0.1444	-0.1666	0.0222
258	-0.1674	-0.0885	0.1539	-0.133	0.0567	-0.0287	-0.0422	0.0951	-0.0416	1.3989	2.1059	1.9645	1.5075	2.6213	1.8763	1.8019	2.0828	3.5221	1.1697	1.3179	1.1913	0.7046	0.6475	0.5276	0.7367	0.5512	1.4302	1.0257	0.926	0.9745	1.107	0.4259	0.1541	0.7398	1.0558	1.1696	1.5652	1.2121	0.6156	0.8292	0.6434	0.4613	-0.049	-0.0504	-0.0778	0.1382	-0.0404	-0.1836	0.0192
260	-0.2114	-0.0965	0.0519	0.105	0.0107	0.0203	-0.0062	-0.0929	-0.0706	1.3439	1.6039	2.2435	1.3975	2.4783	1.8863	1.8689	2.1198	3.1931	1.2477	1.2709	1.1763	0.6936	0.5595	0.5136	0.6947	0.5892	1.5302	1.2187	0.872	0.8815	0.789	0.5129	0.2491	0.8068	1.0598	1.1806	1.5672	0.9241	0.6556	0.7792	0.5514	0.4453	0.105	-0.0374	-0.1338	0.1322	-0.0594	-0.1116	0.0382
262	-0.1834	-0.1665	0.0399	-0.089	0.1427	0.0263	-0.0392	-0.0879	0.0124	1.2769	1.8499	2.0905	1.5895	2.3113	1.7613	1.8299	2.2128	3.4031	1.3367	1.2429	1.1063	0.8096	0.5995	0.4016	0.5027	0.5132	1.4832	1.1147	0.798	0.8085	0.707	0.4249	0.2601	0.7328	1.1218	1.0686	1.5112	1.2041	0.6756	0.8312	0.5394	0.5153	0.008	-0.0584	-0.0938	0.0182	-0.1094	-0.1076	0.0652
264	0.0256	-0.1365	0.0819	0.029	0.0377	0.0023	-0.0682	-0.0219	0.0534	1.4069	1.9369	2.0965	1.6895	2.1233	1.7683	1.8669	2.1798	3.5121	1.3307	1.2379	1.1663	0.8316	0.7575	0.5036	0.7307	0.5632	1.4852	1.0697	0.796	0.8505	0.852	0.4769	0.1841	0.8208	1.0358	1.2016	1.5792	1.0291	0.6716	0.7492	0.7144	0.3773	0.039	-0.0114	-0.0508	-0.1948	-0.0184	-0.0976	-0.0088
266	-0.0884	-0.1265	0.0279	0.014	0.0567	0.0743	-0.0972	-0.0309	0.0654	1.2919	1.5199	2.2495	1.7295	1.9203	1.8423	1.8839	2.2298	3.3281	1.2537	1.4299	1.4233	0.8066	0.7285	0.5596	0.6037	0.6012	1.5712	1.0907	0.917	0.7855	1.039	0.6889	0.4811	0.8518	1.0458	1.1996	1.5332	0.8491	0.6106	0.8162	0.5694	0.5203	-0.037	0.0296	-0.0358	-0.0028	-0.0854	-0.0046	-0.0508
268	-0.0804	-0.0935	0.1249	-0.141	0.0377	0.0063	-0.1662	-0.0939	-0.0306	1.4299	1.7169	2.1505	1.6395	1.7913	1.8103	1.9819	2.1078	2.9111	1.2257	1.3029	1.2643	0.8176	0.8805	0.4446	0.5217	0.5282	1.7472	0.9797	0.837	0.8265	1.062	0.6129	0.2941	0.7038	1.0478	1.1126	1.6522	1.1871	0.7896	0.8412	0.5654	0.4563	0.005	0.0326	-0.0378	0.0412	-0.1204	-0.2156	0.0262
270	-0.0254	-0.1555	0.2509	-0.11	0.1107	-0.0077	-0.1392	-0.0279	0.0794	1.2789	1.1159	2.1155	1.4895	1.8923	1.8293	1.8519	1.9268	3.0261	1.2887	1.5469	1.6753	0.8956	0.8265	0.5726	0.5377	0.5552	1.4042	1.0147	0.956	0.9355	0.789	0.5809	0.3051	0.7128	1.0718	1.1956	1.6462	0.9471	0.7446	0.7802	0.5104	0.5783	0.088	0.0086	-0.0698	0.0062	-0.1284	-0.1996	0.0332
272	-0.0784	-0.0945	0.0499	-0.021	0.1217	-0.0417	-0.1082	-0.0699	-0.0266	1.6149	1.1479	2.0475	1.3205	1.7493	1.8353	1.7769	2.0268	3.2211	1.3047	1.3919	1.5343	0.8026	0.8285	0.4626	0.6657	0.4512	1.5912	1.0287	1.147	0.8565	0.707	0.5559	0.3321	0.7388	1.0478	1.1396	1.5482	0.9271	0.6536	0.7502	0.5294	0.6413	-0.018	0.0026	-0.1038	-0.0898	-0.0934	-0.1136	0.0672
274	-0.0094	-0.0855	0.1489	-0.112	0.2527	-0.0487	-0.0972	-0.0709	0.0154	1.3479	1.3739	1.9905	1.5805	1.7063	1.8113	1.8059	2.1198	2.7591	1.2927	1.3239	1.4093	0.9356	0.8345	0.3386	0.5747	0.7042	1.4992	0.9797	1.113	0.8795	0.711	0.5379	0.4261	0.7358	1.0368	1.1566	1.5912	0.9531	0.6276	0.8222	0.5234	0.5033	0.039	0.0416	-0.0088	-0.0398	-0.0914	-0.1446	0.0102
276	-0.0674	-0.1005	0.0849	-0.092	0.1447	-0.0627	-0.0392	-0.0109	-0.0196	1.5329	1.7629	1.8335	1.4915	1.9023	1.8533	1.8159	1.7488	3.0251	1.3147	1.3999	1.4393	0.8976	0.8015	0.3856	0.7807	0.7082	1.5072	1.0637	1.027	0.9585	0.948	0.7369	0.2491	0.7338	1.0728	1.1936	1.6262	1.1681	0.5936	0.8462	0.5024	0.6003	0.016	0.0376	-0.0968	-0.1368	-0.0624	-0.0996	0.0132
278	-0.1684	-0.1455	0.0319	-0.083	0.1087	-0.0067	-0.0492	0.0421	-0.0116	1.4139	1.4239	1.7665	1.5085	1.6413	1.7833	1.7479	1.6368	2.9941	1.3997	1.3289	1.3153	0.9266	0.6945	0.4826	0.7897	0.7352	1.5482	1.0857	1.008	0.9735	0.814	0.5639	0.2911	0.7178	1.1478	1.0546	1.4782	1.0361	0.6056	0.8562	0.5984	0.5343	0.139	-0.0444	-0.0958	0.1802	-0.0704	-0.1726	0.1032
280	-0.0664	-0.0425	-0.0251	-0.01	0.1817	-0.0067	0.0138	-0.0119	-0.0646	1.3379	1.5009	1.7795	1.6885	2.0043	1.8333	2.0529	1.6968	2.9921	1.3777	1.3549	1.2543	0.7336	0.6935	0.3126	0.7307	0.5662	1.5282	1.1047	1.072	0.9345	0.828	0.5479	0.2921	0.6538	1.0998	1.2156	1.3642	1.1571	0.6926	0.7452	0.6784	0.5843	0.038	0.0246	0.0532	-0.0818	-0.1174	-0.0976	0.0692
282	-0.1484	-0.1065	0.2149	-0.083	-0.0823	0.0423	-0.1272	-0.1369	-0.0446	1.2519	1.4389	1.8115	1.4665	1.7823	1.7773	1.9079	1.6538	3.1941	1.4287	1.3609	1.1753	0.7676	0.6975	0.3046	0.6977	0.7142	1.5762	1.0887	1.054	0.7775	0.908	0.5409	0.2251	0.6778	1.1568	1.3386	1.5942	1.1141	0.7786	0.7892	0.5674	0.5953	-0.024	0.0286	-0.0228	-0.0028	-0.1244	-0.0476	0.0942
284	-0.2644	-0.1045	0.1219	-0.062	0.2007	0.0573	-0.1142	-0.0329	-0.0546	1.3569	1.1399	1.8955	1.2355	1.8233	1.8463	1.7969	1.5228	3.1191	1.3437	1.1609	1.2933	0.6276	0.7315	0.2666	0.8747	0.6302	1.6252	1.0937	1.079	0.7735	1.063	0.7109	0.2831	0.8118	1.2088	1.1766	1.6092	0.9781	0.8226	0.8402	0.5754	0.5173	-0.009	0.0676	-0.0528	-0.0158	-0.0914	-0.0596	0.1302
286	-0.2064	-0.1945	0.0819	-0.185	0.1567	-0.0367	-0.1432	-0.0649	-0.0946	1.3889	1.0439	1.8695	1.4185	1.6573	1.9003	1.7149	1.3618	4.1801	1.2127	1.2829	1.2163	0.9616	0.6855	0.3346	0.9077	0.7062	1.4792	1.1647	0.881	0.8855	0.816	0.5579	0.2311	0.7078	1.1588	1.2816	1.6562	1.0971	0.7106	0.8832	0.6044	0.5643	0.086	-0.0284	-0.0038	-0.0718	-0.1624	0.0354	0.1832
288	-0.0714	0.0045	0.1399	-0.133	0.0977	-0.0187	-0.1262	0.0641	0.0524	1.2329	1.3269	1.8775	1.3905	1.5713	1.9323	1.7529	1.2168	3.6411	1.3067	1.1749	1.5563	1.1536	0.7685	0.5286	0.8237	0.4582	1.3492	1.1937	0.973	0.9355	0.973	0.5049	0.2441	0.7458	1.1318	1.3046	1.5652	1.0221	0.6896	0.8322	0.5944	0.6013	0.029	-0.0144	-0.0578	0.0372	-0.0644	-0.1326	0.0742
290	-0.0374	-0.1095	0.0779	-0.09	-0.0013	-0.0737	-0.0302	-0.0479	0.0514	1.2759	1.5119	1.7565	1.4235	1.9973	1.8143	1.6129	1.2688	3.5801	1.2877	1.2139	1.5153	1.4776	0.8795	0.4866	0.8737	0.7242	1.3332	1.1657	1.013	0.7775	0.834	0.4019	0.2651	0.7458	1.1858	1.1736	1.4552	1.1341	0.5926	0.8162	0.5784	0.5653	-0.008	-0.0744	-0.0108	-0.0058	-0.0484	-0.1406	0.0912
292	-0.1484	-0.0715	0.1159	0.06	0.0617	-0.0567	-0.1942	-0.0699	-0.0056	1.5349	1.3509	1.9465	1.4915	1.9873	1.7873	1.5539	1.2888	3.9501	1.2707	1.2239	1.2413	1.5766	0.7725	0.4996	0.9197	0.7292	1.2642	1.1117	1.065	0.7995	0.964	0.4389	0.1741	0.7478	1.1488	1.1366	1.4852	1.0101	0.7786	0.8272	0.5954	0.5613	-0.008	-0.0254	-0.0928	0.0092	-0.1474	-0.0486	0.1532
294	-0.1474	-0.0945	0.1799	-0.033	0.2747	-0.0257	-0.1022	-0.0179	0.0274	1.4319	1.1549	1.8205	1.3365	1.7693	1.7893	1.8609	1.1888	4.4401	1.2837	1.2359	1.1943	0.5626	0.6885	0.6726	0.9217	0.7472	1.3112	1.1527	1.015	0.8275	0.868	0.3379	0.1771	0.8108	1.1198	1.1506	1.6072	0.9871	0.5756	0.7772	0.6654	0.7653	-0.059	-0.0614	-0.0228	0.1612	-0.1244	-0.1576	0.1202
296	-0.1374	-0.1195	0.2409	-0.032	0.2217	0.0323	-0.1382	-0.0819	-0.0126	1.2319	1.3729	1.7435	1.3575	1.9553	1.8293	1.9059	1.1988	4.2871	1.3097	1.0679	1.1993	0.7956	0.7325	0.5176	1.1377	0.8452	1.1052	1.1687	0.9	0.7215	0.848	0.1849	0.3001	0.7748	1.0078	1.2156	1.5802	1.0911	0.5946	0.7142	0.5874	0.4553	-0.013	-0.0524	0.1282	-0.0558	-0.1844	-0.1346	0.1362
298	-0.0794	-0.1445	0.0529	-0.177	0.1027	-0.0467	-0.0902	-0.0579	0.0994	1.2799	1.2839	1.7425	1.5185	1.7033	1.7083	1.9519	1.1478	3.8931	1.4197	1.1969	1.2193	0.9496	0.8465	0.5916	0.9247	0.5962	1.2742	1.1847	0.854	0.7875	0.792	0.3039	0.2831	0.6998	1.0048	1.3816	1.5142	1.2111	0.5776	0.6982	0.6214	0.6193	0.042	-0.0144	0.0062	-0.0648	0.0036	-0.1826	0.1562
300	-0.1244	-0.1235	0.0619	-0.011	0.0797	-0.1387	-0.0922	-0.0199	0.0244	1.5979	1.3139	1.7145	1.5765	1.7363	1.7203	1.8209	1.2818	4.0661	1.2207	1.1819	1.5103	0.4796	0.7415	0.4876	0.7167	0.7012	1.1522	1.1667	0.898	0.8065	0.736	0.3159	0.2121	0.8078	1.1518	1.2186	1.5152	1.0021	0.4796	0.7192	0.5054	0.8203	0.025	-0.0034	-0.1358	-0.1478	0.0566	-0.0846	0.2102
302	-0.0574	-0.0755	-0.0611	0.153	0.1167	0.0473	-0.1682	-0.0559	-0.0436	1.7939	1.2429	1.7545	1.4275	1.7113	1.7003	1.9069	1.2568	3.0711	1.3457	1.0619	1.2863	0.6646	0.6575	0.3956	0.8587	0.8662	1.2242	1.1217	0.909	0.7585	0.751	0.4099	0.2001	0.8688	1.0778	1.1746	1.4572	1.4151	0.6166	0.8402	0.5704	0.7163	0.049	0.0626	-0.0688	-0.0178	-0.0024	-0.1746	0.1062
304	-0.1544	-0.1835	0.2359	-0.033	0.0707	0.0913	-0.1012	-0.0939	-0.0166	1.5589	1.1569	1.9415	1.4775	1.7653	1.6773	2.1409	1.4688	3.0811	1.2647	1.0499	1.3093	0.7146	0.6085	0.4206	0.8187	0.6452	1.4732	1.1277	0.874	0.7925	0.827	0.2529	0.1801	0.8118	1.0518	1.0426	1.4652	1.0011	0.5836	0.8012	0.5934	0.6643	0.041	-0.0124	-0.0118	0.1032	-0.1504	-0.2246	0.1752
306	-0.1354	-0.0215	0.1349	-0.054	-0.1003	0.1043	-0.1212	-0.0959	-0.0686	1.4069	1.3289	1.9875	1.6175	1.8483	1.6533	2.1449	1.4698	3.1141	1.2387	1.1509	1.4843	0.6626	0.6485	0.3806	0.7527	0.6272	1.4362	1.1727	0.925	0.8055	0.712	0.3889	0.1991	0.5488	1.1628	1.0886	1.3322	1.0531	0.5106	0.8022	0.6274	0.7473	0.093	0.0686	0.0072	0.0192	-0.0274	-0.2706	0.1342
308	-0.0854	-0.1245	0.2959	0.081	-0.0373	0.1293	-0.1502	-0.1269	-0.0396	1.4529	1.5659	2.0535	1.8215	1.8343	1.7763	2.0929	1.3638	2.8601	1.2647	1.2389	1.1733	0.7516	0.6705	0.4776	0.6827	0.6982	1.1532	1.0637	0.852	0.6035	0.681	0.3129	0.3001	0.6488	1.1038	1.4716	1.5492	1.0351	0.4966	0.9192	0.6184	0.6423	0.11	0.0916	-0.0178	-0.0438	-0.1774	-0.1726	0.0912
310	-0.0924	-0.1005	0.1559	-0.139	0.0197	-0.0137	-0.0632	-0.0179	-0.0356	1.4579	1.4149	2.1335	1.4785	1.7223	1.6603	1.8729	1.5408	2.8971	1.2807	1.2699	1.1813	0.8996	0.5975	0.3606	0.5297	0.7862	1.1092	1.0997	0.849	0.7475	0.765	0.2989	0.1641	0.6538	1.0178	1.1666	1.3842	1.0681	0.6186	0.8482	0.7124	0.6523	0.088	-0.0284	-0.0438	-0.0428	-0.1024	-0.2026	0.1682
312	-0.0844	-0.0085	0.0129	0.014	-0.0493	-0.0217	-0.1192	-0.0049	-0.0106	1.8029	2.1929	2.2835	1.7245	2.0963	1.6533	1.8339	1.3968	2.9021	1.2547	1.0989	1.3583	0.5226	0.5605	0.4546	0.7077	0.5532	1.2632	1.2097	0.94	0.8425	0.652	0.3209	0.1701	0.7938	1.0758	1.3206	1.5662	0.9071	0.5006	0.7682	0.6594	0.6183	0.012	-0.0424	-0.1168	-0.0188	-0.1084	-0.2286	0.1442
314	-0.0294	-0.1075	0.2709	0.004	-0.0643	-0.0947	-0.1322	-0.0999	-0.0076	1.4399	1.8019	2.1975	2.0435	1.9573	1.7163	1.8709	1.4378	2.7671	1.2437	1.6469	1.1703	0.6216	0.6095	0.5226	0.6707	0.7592	1.2432	1.0607	0.996	0.8215	0.712	0.3659	0.2151	0.6448	1.1078	1.2856	1.5942	1.1141	0.4576	0.8062	0.7464	0.6043	0.145	0.0896	-0.1208	0.0592	-0.0664	-0.2476	0.1432
316	-0.0674	-0.0785	0.1359	-0.045	0.0247	0.0463	-0.2132	-0.0259	0.0214	1.1059	1.4939	2.0475	2.0955	2.0833	1.6773	1.8279	1.3918	2.8481	1.1647	1.2119	1.2813	0.4976	0.6195	0.6816	0.9167	0.5842	1.1532	1.1427	0.871	0.9555	0.637	0.3709	0.0711	0.7378	1.0888	1.1716	1.6132	0.8291	0.4986	0.8372	0.7244	0.6373	0.085	-0.0374	-0.1428	-0.0468	-0.0824	-0.1476	0.0532
318	-0.0334	-0.1245	0.1589	0.053	0.0007	-0.0827	-0.0482	-0.1209	-0.0346	1.3219	1.3279	2.1195	2.5585	2.2603	1.6443	1.7779	1.4368	3.4441	1.2207	0.9989	1.2783	0.7426	0.6525	0.6136	0.7607	0.5662	1.1432	1.1727	0.993	0.9735	0.638	0.3329	0.2691	0.7398	1.1998	1.2846	1.5582	0.9821	0.6136	0.8592	0.6644	0.6453	-0.069	0.0646	-0.0998	0.0402	-0.1964	-0.1476	0.2122
320	-0.0104	-0.1865	-0.0211	-0.139	-0.0363	-0.0227	-0.2122	-0.0609	-0.0816	1.2439	1.2749	1.8735	2.3535	2.3623	1.6263	1.7219	1.4478	3.7201	1.2007	1.1729	1.3323	0.6446	0.5505	0.4636	1.0617	1.0192	1.1222	1.0867	0.784	0.8635	0.632	0.3389	0.2641	0.4428	1.0138	1.0586	1.5882	0.8301	0.5316	0.8352	0.6014	0.5163	-0.045	-0.0194	-0.1388	-0.0178	-0.0644	-0.1786	0.2212
322	-0.1514	-0.0515	0.3059	-0.071	-0.0403	-0.0757	-0.1842	-0.1709	-0.0676	1.5649	1.1919	1.8585	2.1645	1.9153	1.6543	1.4999	1.4698	3.3351	1.2047	1.0199	1.1373	0.6406	0.4775	0.6536	1.2217	0.6742	1.1642	1.2287	0.779	0.9315	0.733	0.3729	0.2001	0.4888	1.0888	1.2306	1.6102	1.2621	0.6066	0.9022	0.7084	0.7793	0.098	-0.0244	-0.0158	0.1342	-0.1054	-0.1856	0.1342
324	-0.1194	-0.1485	0.0409	-0.086	-0.0273	-0.0347	-0.2102	-0.0259	0.0444	0.9629	1.2129	2.0135	3.0265	1.6983	1.7283	1.5419	1.3438	3.1041	1.1037	1.1349	1.4963	0.6406	0.5005	0.4196	1.0007	0.6402	1.1052	1.1767	0.869	0.9205	0.661	0.5199	0.2421	0.7438	1.0888	1.0836	1.5432	1.1811	0.5456	0.8852	0.6284	0.8173	-0.001	0.0026	-0.0728	0.1452	-0.0584	-0.0956	0.1242
326	-0.1254	-0.0965	0.2079	-0.129	-0.0803	-0.0737	-0.1082	-0.1359	-0.0046	1.4999	0.8769	1.9805	3.0545	1.8753	1.7063	1.6239	1.4118	3.1881	1.2157	1.0269	1.1923	0.7096	0.6365	0.5726	1.0537	0.6962	1.2692	1.1427	0.753	0.8725	0.562	0.4339	0.2881	0.5038	1.2008	1.2876	1.6392	1.3281	0.5476	0.8872	0.5734	0.7483	0.04	0.0266	-0.0738	0.2442	-0.0894	-0.1316	0.0792
328	-0.1024	-0.1755	0.1479	-0.069	0.1067	-0.0607	-0.1632	-0.0189	0.0824	1.3989	1.0549	1.9175	3.5025	1.7483	1.7013	1.8969	1.5208	3.1821	1.1857	1.0599	1.1513	0.5526	0.5095	0.8016	1.0307	0.8152	1.1692	1.1167	0.934	0.8855	0.685	0.4249	0.1881	0.5038	1.1168	1.3246	1.7302	1.1251	0.5416	0.9472	0.5114	0.5813	-0.017	-0.0214	-0.0948	0.0502	-0.0254	-0.1826	0.0962
330	-0.0964	-0.1595	0.0909	-0.06	-0.0543	-0.0217	-0.1042	-0.0449	-0.0726	1.2029	1.3209	1.7725	2.0665	1.8143	1.7183	1.9139	1.6568	2.8301	1.2667	1.0479	1.1853	0.7906	0.6445	0.4436	1.0677	0.6492	1.1522	1.1127	1.004	1.0185	0.788	0.5789	0.2831	0.5898	1.1078	1.0796	1.5592	1.0321	0.4866	1.2222	0.6114	0.7513	0	0.0546	-0.0838	0.0472	-0.0204	-0.1986	0.1012
332	-0.1614	-0.1765	0.0299	-0.016	0.0037	-0.0287	-0.1412	-0.0229	-0.0096	1.2529	1.6949	1.5525	2.2365	1.6233	1.5623	1.8769	1.5018	2.7161	1.2867	0.9209	1.3273	0.8396	0.5895	0.3256	1.0647	0.4852	1.1922	1.0007	0.793	0.9605	0.709	0.5319	0.2201	0.6018	1.0598	1.0936	1.4522	1.0571	0.5666	1.0582	0.6004	0.7523	-0.052	-0.0214	-0.1328	0.0862	-0.1384	-0.2066	0.1212
334	-0.0754	-0.1885	0.1659	-0.033	0.0907	-0.0877	-0.1712	-0.1199	-0.0176	1.4579	1.1769	1.5995	1.9245	1.5093	1.6163	1.7599	1.5548	2.6071	1.4257	1.0389	1.4383	0.5226	0.7115	0.3606	1.0207	0.4282	1.2342	0.9607	0.874	0.9275	0.58	0.4899	0.1741	0.6978	1.0378	1.0736	1.4742	0.9571	0.5706	1.0152	0.6134	0.7263	-0.033	0.0386	-0.2038	-0.1108	-0.0274	-0.2406	0.0822
336	-0.0894	-0.2295	0.1919	-0.121	0.0927	-0.0387	-0.1452	-0.0209	0.0364	1.1229	1.7549	1.7135	1.7945	1.5963	1.6593	1.6589	1.4878	3.1101	1.1337	1.0689	1.2333	0.8886	0.7805	0.5976	0.6757	0.3342	1.2122	0.9887	1.058	0.9135	0.587	0.4339	0.2471	0.4868	1.0148	1.0896	1.5652	0.8751	0.4876	0.9692	0.5624	0.6023	-0.081	0.0286	-0.0098	-0.0508	-0.1314	-0.1976	0.1772
338	-0.0744	-0.1885	-0.0221	-0.146	0.0437	0.0053	-0.1402	-0.0529	-0.0716	1.2579	1.3449	1.8285	1.8715	1.6003	1.6593	1.8799	1.4248	2.8851	0.8847	0.9189	1.2663	0.6166	0.7625	0.7146	0.7277	0.4432	1.1482	0.9397	0.948	0.9385	0.905	0.4149	0.2141	0.6108	1.0458	1.1456	1.5922	0.8831	0.5876	0.9582	0.6074	0.5793	0.045	-0.0164	-0.0368	-0.0708	0.0256	-0.0806	0.0702
340	-0.0564	-0.1395	0.0209	-0.183	0.0267	-0.0997	-0.1662	0.1031	0.0274	1.0879	1.7259	1.6955	1.7725	1.7543	1.6733	1.8599	1.6648	2.7501	0.8367	0.9709	1.3153	0.7126	0.6805	0.7086	0.8227	0.5982	1.2512	0.9247	0.78	0.9375	1.008	0.4279	0.2791	0.6828	1.0228	1.0446	1.4592	1.1701	0.4946	1.0292	0.6294	0.6323	0.055	-0.1134	-0.0708	0.0832	-0.0224	-0.2436	0.0822
342	-0.0464	-0.1515	0.0979	-0.096	-0.0163	-0.0357	-0.1272	-0.0529	-0.0016	0.8529	1.7469	1.7365	1.6535	1.7143	1.6243	1.8579	1.4918	2.8951	0.9077	1.3339	1.2363	0.9196	0.7165	0.4056	0.7717	0.6082	1.1432	0.9337	0.771	0.8495	0.67	0.5059	0.2081	0.6318	1.0658	1.0696	1.5012	0.9921	0.4356	0.8412	0.6044	0.6523	0.017	-0.0874	-0.0488	-0.0448	-0.1674	-0.0566	0.1032
344	-0.1034	-0.0705	0.1659	-0.044	0.1777	-0.0857	-0.1262	0.0111	-0.0406	0.7589	1.4759	1.9575	1.7625	1.5113	1.5673	1.9389	1.6818	3.0611	0.9007	0.9749	1.0773	0.9936	0.5605	0.6006	0.9537	0.5412	1.4292	0.9397	0.784	1.0115	0.877	0.5179	0.1851	0.6278	0.9988	1.2296	1.5982	1.0791	0.4126	0.9332	0.6464	0.5923	0.048	-0.0114	-0.1158	0.1302	0.0726	-0.1376	0.1312
346	0.0346	-0.1295	0.2029	-0.1	0.0117	-0.0587	-0.1372	-0.0709	-0.0246	1.1159	1.8309	2.0045	1.6635	1.5143	1.4873	2.0449	1.5848	2.8931	0.8677	0.9989	1.1293	0.2306	0.6955	0.8116	1.0537	0.5962	1.3272	0.9087	0.977	0.8925	0.619	0.3329	0.2311	0.7038	0.9888	1.3566	1.5182	0.9861	0.5446	0.9162	0.6164	0.6823	-0.047	-0.0944	-0.0698	0.0662	-0.1404	-0.1606	0.1242
348	-0.0694	-0.0825	0.2359	-0.036	-0.0723	-0.1017	-0.1142	0.0131	-0.0516	1.1509	1.8649	2.0355	1.5955	1.5533	1.5163	1.6409	1.5708	2.9571	0.8967	1.0629	1.1463	0.3066	0.6115	0.6716	1.1417	0.6862	1.4212	0.9497	0.877	0.8755	0.681	0.3929	0.1891	0.6188	0.9738	1.2996	1.4602	0.9081	0.6166	0.9852	0.5774	0.6373	0.027	-0.0344	-0.0158	-0.0668	-0.0984	-0.2046	0.0622
350	-0.1214	-0.1065	-0.0011	-0.126	-0.0803	-0.0677	-0.0882	-0.0969	-0.0366	1.2629	2.1839	1.7845	1.8055	1.6523	1.5893	1.6129	1.7108	3.0521	0.8527	1.0209	1.2793	0.3226	0.6945	1.0956	0.9237	0.5772	1.5112	0.8827	0.743	0.8795	0.615	0.4829	0.1861	0.6978	1.1738	1.0376	1.4182	0.8501	0.5126	0.9942	0.5514	0.5963	-0.083	-0.0854	-0.1108	-0.0948	-0.0984	-0.2246	0.0202
352	-0.1654	-0.0835	0.1879	-0.033	-0.0783	-0.0667	-0.2272	-0.0559	-0.0816	1.2309	2.2859	1.5215	1.9865	1.5283	1.6103	1.6099	1.7698	2.9351	1.0677	1.2039	1.2373	0.2776	0.7425	0.9976	1.0687	0.6672	1.5922	0.9377	0.8	0.7745	0.537	0.3199	0.1701	0.7388	1.1398	1.1786	1.2952	1.0371	0.5676	1.0172	0.7174	0.3443	0.002	-0.0714	-0.0988	0.1032	-0.0044	-0.2306	0.0522
354	-0.0404	-0.0245	0.2499	-0.047	-0.0693	-0.0047	-0.0452	-0.1099	-0.0486	1.1789	2.8879	1.6805	1.4925	1.4723	1.5883	1.5469	1.6418	2.7931	1.0017	1.1579	1.1953	0.2956	0.7305	1.2216	0.9187	0.5992	1.5862	0.9647	0.844	0.7925	0.705	0.3489	0.1781	0.6308	1.2028	1.1306	1.3482	0.8031	0.5476	0.9902	0.7004	0.5003	-0.022	-0.0264	-0.1328	-0.0708	-0.0394	-0.1656	0.0812
356	-0.1584	-0.0805	0.2049	-0.001	-0.0053	-0.0557	-0.1762	-0.0349	0.0044	1.2539	2.1329	1.4885	1.5285	1.4893	1.4833	1.5479	1.6418	2.7461	1.0077	0.9939	1.1633	0.2186	0.5995	1.3716	0.9577	0.6392	1.5892	0.9727	0.736	0.8205	0.505	0.3339	0.1231	0.6348	1.0828	1.1776	1.3362	0.6681	0.3946	0.9682	0.6804	0.5423	0.16	-0.0584	-0.0418	0.0832	-0.0704	-0.2596	0.1242
358	-0.2004	-0.0865	0.2229	-0.012	0.0017	-0.1167	-0.1252	-0.0349	-0.0406	0.9519	1.1439	1.6735	1.3035	1.6453	1.5583	1.4879	1.4318	2.5601	1.0557	1.1029	1.3103	0.3666	0.6465	1.7526	1.0237	0.7372	1.3852	0.9747	0.727	0.8745	0.63	0.4009	0.2241	0.5348	1.1788	1.1696	1.3752	0.8111	0.3816	0.8532	0.7864	0.5613	-0.002	-0.0804	-0.1048	0.0782	-0.1324	-0.1406	0.1252
360	-0.1014	-0.1245	0.0589	-0.159	-0.0203	0.0733	-0.1832	-0.1239	-0.0896	0.9909	1.2309	1.7435	1.3755	1.5413	1.6643	1.4469	1.5078	2.7401	1.0397	1.0529	1.3223	0.3196	0.7135	0.9676	1.0247	0.5932	1.5012	0.8857	0.826	0.8395	0.5	0.3379	0.1701	0.5938	1.1458	0.9526	1.3532	1.2161	0.4376	1.0852	0.7404	0.4953	-0.015	0.0046	-0.1688	0.2042	-0.1904	-0.2426	0.1522
362	-0.0474	-0.0635	0.0829	-0.14	0.0567	-0.0547	-0.1412	-0.0429	-0.0406	1.1729	1.4789	1.4425	1.3065	1.5643	1.4743	1.4729	1.9498	2.6421	0.9727	1.0569	1.4203	0.3996	0.7425	0.5246	0.8357	0.5382	1.3242	0.9127	0.896	0.8335	0.509	0.4429	0.1561	0.5368	1.1948	1.0156	1.2312	0.9191	0.3856	0.9332	0.6464	0.7493	0.069	-0.0754	-0.1378	-0.0798	-0.1404	-0.2776	-0.0048
364	-0.0634	-0.0525	-0.1331	-0.13	0.0137	-0.0737	-0.1212	-0.1529	-0.0596	0.8409	1.1249	1.4575	1.3305	1.5763	1.5383	1.3919	1.6178	2.9971	0.9367	1.0909	1.0733	0.2176	0.7155	0.4676	0.9647	0.5712	1.2392	1.0727	0.809	0.8255	0.585	0.4859	0.1861	0.7158	1.2048	1.1026	1.4972	0.8611	0.3646	0.9482	0.8034	0.5423	-0.073	-0.1154	-0.2258	-0.0638	-0.1194	-0.2016	0.0262
366	-0.1604	-0.0065	0.2039	-0.022	-0.0103	-0.1017	-0.1592	-0.0949	-0.0206	1.0449	1.0639	1.7795	1.2455	1.5813	1.5103	1.5539	1.6228	2.9421	1.0067	1.1909	1.1073	0.3456	0.6465	0.6236	0.8807	0.8352	1.1532	0.9507	0.77	0.7485	0.752	0.3249	0.1841	0.6428	1.2158	1.2206	1.4562	0.9291	0.4086	1.0242	0.8294	0.5723	-0.007	-0.0814	-0.0998	0.1052	-0.1094	-0.2036	0.0622
368	-0.1274	-0.0235	0.4089	-0.126	-0.0703	-0.0237	-0.1042	-0.1149	-0.0246	0.8469	0.9699	1.5815	1.6075	1.5893	1.4793	1.4829	1.6118	3.1311	1.1527	1.0909	1.0453	0.3146	0.7215	0.4896	0.9037	0.7182	1.1702	0.9347	0.866	0.7375	0.514	0.3879	0.1561	0.6498	1.1068	1.1386	1.6462	1.1201	0.4546	0.9642	0.7524	0.6093	-0.001	0.0256	-0.1448	0.0162	-0.0444	-0.2316	0.1662
370	-0.0544	-0.0785	0.3369	-0.116	0.0427	-0.0777	-0.1902	-0.0829	-0.0916	0.8149	1.3389	1.4895	1.3505	1.6453	1.4833	1.4749	1.5068	2.9451	1.1727	1.1319	1.1263	0.3496	0.7515	0.2766	0.7947	0.6722	1.1332	0.9497	0.98	0.8505	0.625	0.4799	0.2071	0.6788	1.1198	1.3636	1.6882	0.8961	0.4686	0.9602	0.7534	0.5123	0.047	-0.0094	-0.1028	0.1612	-0.0934	-0.1846	0.1342
372	-0.1364	-0.0855	0.0959	-0.063	0.0137	-0.0687	-0.1662	-0.1759	-0.0226	0.6159	2.2229	1.5815	1.3475	1.4923	1.5093	1.5119	1.4708	2.6451	1.1207	1.1509	0.9823	0.3496	0.5955	0.5526	0.9087	0.6662	1.0802	0.9477	0.722	0.7805	0.625	0.4929	0.2221	0.5848	1.0608	1.1516	1.6292	0.7791	0.4806	0.8492	0.7604	0.6023	0.052	-0.0884	-0.1158	0.0482	-0.1244	-0.1786	0.0762
374	-0.1214	-0.0675	0.0619	-0.114	-0.1783	0.0403	-0.1472	-0.0049	-0.0056	0.8989	1.4499	1.9475	1.1975	1.6713	1.5123	1.6669	1.4818	2.4401	1.1677	1.0069	1.0763	0.4626	0.6215	0.7306	1.0797	0.5902	1.2492	0.9487	0.784	0.7755	0.71	0.3359	0.1941	0.5698	1.1248	1.1796	1.9512	0.6781	0.5746	0.9032	0.8124	0.5983	0.005	-0.1064	-0.0498	-0.1138	-0.1554	-0.1866	0.1442
376	-0.2134	-0.0985	0.0759	-0.016	0.1027	-0.1177	-0.0802	-0.0379	0.0144	0.8459	1.6869	1.8015	1.3995	1.6953	1.5683	1.5539	1.3808	2.7381	1.1937	1.3229	1.0563	0.5076	0.8335	0.8916	1.1177	0.7642	1.0472	0.9677	0.685	0.8095	0.837	0.3199	0.2321	0.5638	1.2338	1.1696	1.6812	0.7141	0.5656	0.9672	0.7074	0.4603	-0.002	-0.0924	-0.0228	-0.1338	0.0106	-0.2446	0.1002
378	-0.1804	-0.0955	-0.0581	-0.159	0.0107	-0.0297	-0.0902	-0.0279	-0.0696	0.8459	1.9179	1.8745	1.3305	1.5653	1.5833	1.5529	1.3408	2.8671	1.1447	1.1159	1.4733	0.4656	0.7575	0.4236	1.2017	0.5292	1.0602	0.8807	0.744	0.6775	0.881	0.3089	0.2511	0.6178	1.1338	1.2926	1.5702	0.8061	0.5106	0.8452	0.8244	0.4913	0.053	-0.0784	-0.1058	0.0842	-0.0874	-0.1676	0.0122
380	-0.2094	-0.1205	0.0569	-0.027	0.0597	-0.0627	-0.1412	-0.0819	0.0044	0.9229	1.8789	2.1095	1.2735	1.4593	1.6093	1.5999	1.4618	2.7121	0.9587	1.0819	1.5173	0.5226	0.6445	1.9466	1.0077	0.5882	1.5542	1.0627	0.734	0.7055	0.809	0.4639	0.2601	0.5518	1.0578	1.3926	1.4982	0.8031	0.4946	0.9032	0.6994	0.4173	0.108	-0.0744	-0.1018	-0.1528	-0.0404	-0.2246	0.0532
382	-0.1794	-0.0115	0.0099	0.005	0.0257	-0.0547	-0.0932	-0.0809	-0.0026	0.8659	2.0159	1.8465	1.2425	1.8713	1.5673	1.7659	1.3588	2.7991	0.8977	1.1579	1.2863	0.5006	0.7415	1.7156	1.1117	0.5482	1.2922	1.0757	0.85	0.7135	0.669	0.4119	0.2661	0.5528	1.0248	1.2546	1.6562	0.8211	0.5356	0.8592	0.6924	0.5143	0.078	-0.0284	-0.0958	0.0382	-0.1844	-0.0916	0.0732
384	-0.1184	-0.1315	0.1719	-0.011	-0.0383	-0.0647	-0.0942	-0.1019	-0.1196	0.8019	2.1149	1.7805	1.4215	1.7183	1.5033	1.7849	1.6798	2.7931	0.9207	0.9459	1.1743	0.5516	0.6715	2.6086	0.9417	0.6992	1.1772	1.0177	0.852	0.6885	0.864	0.4869	0.1961	0.5998	1.0678	1.1406	1.6072	0.8061	0.5496	0.8892	0.7974	0.4493	0.085	-0.1064	-0.1478	0.0952	-0.1854	-0.0556	0.0002
386	-0.1044	-0.1505	-0.0071	-0.059	-0.0533	-0.0017	-0.1792	-0.0209	-0.0616	0.7859	1.4789	1.9295	1.1765	1.6753	1.5823	1.6689	1.6178	2.7041	0.9037	0.9389	1.3323	0.4026	0.5945	3.0586	0.7507	0.3722	1.1542	0.9657	0.798	0.8265	0.751	0.4649	0.2121	0.6268	1.1518	1.0806	1.5572	0.9581	0.4966	0.8582	0.6914	0.3963	0.111	-0.0014	-0.0418	0.0842	-0.0514	-0.1066	-0.0458
388	-0.0624	-0.1115	0.0679	-0.125	-0.0023	0.0123	-0.2092	-0.0339	0.0344	0.9379	1.6349	1.7935	1.3325	1.5483	1.5293	1.6729	1.5508	2.9191	1.0217	0.8129	1.3283	0.4426	0.8325	1.9186	0.9117	0.3092	1.1902	1.0087	0.978	0.7255	0.715	0.2659	0.1371	0.4228	1.1408	1.1746	1.5442	0.7731	0.6536	0.8572	0.8644	0.4783	0.056	0.0076	-0.2258	-0.0698	-0.1974	-0.0746	0.0452
390	-0.0684	-0.1595	0.0299	-0.231	0.0487	0.0383	-0.1822	-0.0259	-0.0546	0.9439	1.8869	1.8255	1.2495	1.5443	1.4563	1.7059	1.5838	3.4531	1.0877	1.0379	1.4753	0.2926	0.5685	1.9546	0.8627	0.4962	1.1402	1.0117	0.855	0.6475	0.628	0.3389	0.2401	0.5088	1.1618	0.9366	1.5472	0.7691	0.6066	0.8202	0.8004	0.5053	0.002	-0.0874	0.0242	-0.1438	-0.1534	-0.0926	0.0262
392	-0.1944	-0.1575	0.2729	-0.003	-0.0953	-0.0097	-0.1262	-0.0099	-0.0136	0.9099	1.4479	1.4885	1.4185	1.6603	1.4803	1.7099	1.8328	3.8361	1.1937	0.7809	1.3633	0.3496	0.7345	1.9066	1.0007	0.4862	1.0882	0.9357	0.703	0.7865	0.767	0.2429	0.1781	0.5608	1.1638	0.9696	1.4192	0.7651	0.5216	0.8622	0.8434	0.5563	0.053	-0.0174	-0.0758	0.0702	-0.1524	-0.2236	0.0042
394	-0.1094	-0.1045	-0.0071	-0.079	-0.1113	0.0093	-0.0772	-0.0689	-0.0836	0.9529	1.6769	1.7335	1.3915	1.6733	1.5373	1.6539	1.9088	3.9301	1.1317	0.8469	1.0333	0.5296	0.5405	2.3426	1.0327	0.5172	1.0582	1.0437	0.82	0.7825	0.687	0.2609	0.2171	0.5348	1.1168	1.0746	1.7362	1.0691	0.4456	0.8332	0.7974	0.6403	0.05	-0.0624	-0.1548	-0.1708	-0.1064	0.0064	0.1072
396	-0.1744	-0.1195	0.1489	-0.077	0.0917	0.0543	-0.1842	0.0101	0.0764	0.8989	1.6679	1.5535	1.3125	1.6493	1.4793	1.7429	1.6248	4.1771	1.1777	0.9559	1.0903	0.4146	0.7345	3.5336	0.8827	0.3892	1.1672	1.0167	0.835	0.7865	0.668	0.3489	0.2501	0.5428	1.1548	1.1196	1.4282	1.3921	0.4266	0.8332	0.8794	0.6653	0.069	-0.0054	-0.1398	-0.0388	-0.1824	-0.1846	0.0502
398	-0.0564	-0.0335	0.1149	-0.023	0.0917	-0.0697	0.0058	-0.0799	0.0004	0.8699	1.6409	1.7515	1.1635	1.4693	1.4363	1.6639	1.5608	4.6791	1.0997	0.7399	1.0953	0.3416	0.8135	3.5136	1.0657	0.4492	1.0922	1.0317	0.996	0.7375	0.649	0.2229	0.2041	0.6498	1.1378	1.1406	1.3462	1.0361	0.5256	0.7522	0.7494	0.4903	0.023	-0.0714	-0.0928	-0.0248	-0.1424	-0.2056	0.1722
400	-0.1114	-0.1315	0.1399	-0.163	0.0947	-0.0567	-0.2042	-0.0759	-0.0346	1.0099	1.6539	1.5915	1.2685	1.5303	1.4043	1.7529	1.4008	4.2491	1.0677	0.9419	1.2483	0.3246	1.5155	3.5556	1.0777	0.4732	1.0782	1.0067	0.96	0.8475	0.698	0.2799	0.2011	0.6768	1.1578	1.3196	1.4652	0.8621	0.6096	0.7852	0.9074	0.5683	0.03	-0.0824	-0.1718	0.0022	-0.0954	-0.2356	0.0682
402	-0.0364	-0.0975	0.0079	-0.103	0.0527	-0.0387	-0.1082	-0.1179	-0.0436	1.2769	1.9769	1.4925	1.2265	1.4673	1.5113	1.7699	1.5298	3.7041	1.1607	0.8689	1.1043	0.3896	1.3265	1.4586	1.0707	0.7992	1.0262	1.1317	0.81	0.7335	0.658	0.3709	0.1931	0.4888	1.2128	1.1496	1.3202	0.9561	0.5046	0.8042	0.8584	0.5703	0.141	-0.1094	-0.1138	0.0142	-0.0744	-0.1426	0.0842
404	-0.1364	-0.1885	0.1039	-0.03	0.2527	-0.0237	-0.0172	-0.0399	-0.0476	1.2049	1.7389	1.3645	1.3205	1.4773	1.5013	1.6539	1.3328	3.4971	1.2317	0.8099	1.1863	0.4046	1.1545	0.7246	0.9327	0.9802	1.2582	1.0057	0.787	0.8165	0.667	0.3499	0.2051	0.4308	1.1568	1.1316	1.3422	0.9181	0.6556	0.8262	0.8514	0.5443	0.018	-0.0254	-0.0848	-0.0318	-0.0494	-0.2396	0.1282
406	0.0226	-0.1575	-0.0041	-0.034	0.0237	-0.0417	-0.0962	-0.0219	-0.0736	1.4019	1.8299	1.5925	1.2105	1.4913	1.5063	1.6799	1.4258	2.9421	1.2947	0.8569	1.3193	0.6286	0.8955	1.8106	0.9517	0.6612	1.1252	0.9907	0.738	0.8335	0.453	0.2869	0.1821	0.4508	1.1468	1.3396	1.5582	0.8211	0.7546	0.8922	0.7664	0.5973	-0.008	-0.0594	-0.0848	-0.0498	-0.1934	-0.1766	0.0072
408	-0.0994	-0.1245	-0.1011	-0.072	-0.0333	-0.1507	-0.1752	-0.0439	-0.1456	1.3219	2.0379	2.0785	1.2365	1.6403	1.5003	1.5819	1.3618	2.8271	1.2927	0.8809	1.2933	0.5676	1.0235	1.4086	1.0077	0.4182	1.0632	0.9927	0.8	0.8445	0.62	0.2019	0.1481	0.4848	1.1458	1.2436	1.4622	0.8561	0.5036	0.9112	0.8414	0.6033	0.123	-0.0094	-0.0678	0.0162	-0.0564	-0.1526	0.0632
410	-0.1014	-0.1605	0.0389	-0.121	-0.0413	-0.1187	-0.1052	-0.0689	-0.0606	1.1549	2.1659	1.8575	1.1655	1.6163	1.3983	1.6899	1.2958	3.1411	1.3747	1.0179	1.1423	0.6086	0.7265	2.4216	1.0327	0.6192	1.0742	1.0177	0.87	0.7415	0.636	0.1779	0.1491	0.4148	1.0468	1.1776	1.3482	1.1681	0.5546	0.8882	0.7664	0.4953	-0.049	-0.0804	-0.1368	0.1122	-0.0824	-0.1956	0.0892
412	-0.1364	-0.0565	0.1919	-0.191	-0.0523	-0.0127	0.0018	-0.1139	-0.0556	1.0839	1.8789	1.5635	1.1405	1.5403	1.5143	1.6309	1.2158	2.9781	1.5897	0.8999	1.2453	0.4186	0.7485	1.5566	0.9217	0.5972	1.1852	0.8787	0.83	0.7665	0.568	0.2199	0.1121	0.4948	1.0878	1.3766	1.4882	1.0161	0.4616	0.8872	0.8054	0.5223	0.055	-0.0254	-0.0378	0.0182	-0.1734	-0.1016	0.1592
414	-0.1244	-0.0995	0.1079	0.027	0.0117	0.0193	-0.0332	-0.0779	-0.0466	1.2529	2.3269	1.3635	1.1885	1.5113	1.5863	1.7329	1.2448	2.9431	1.3077	0.9279	1.0903	0.3116	0.6085	0.3976	0.8367	0.4532	1.1982	0.9157	0.852	0.9055	0.635	0.2189	0.2071	0.4768	1.0568	1.2586	1.3662	1.1691	0.3486	0.8162	0.8244	0.7013	-0.022	-0.0234	-0.0358	0.0592	-0.1264	-0.2546	0.0712
416	-0.1624	-0.1555	-0.0141	-0.151	0.0237	-0.0797	-0.0832	-0.1079	-0.1146	1.1739	2.2129	1.6485	1.1485	1.5633	1.4963	1.6209	1.2778	3.0001	1.2697	0.9339	0.9743	0.2716	0.6665	0.5446	0.9797	0.4852	1.3302	1.0397	0.972	0.7575	0.7	0.2069	0.1871	0.6118	1.1698	1.1686	1.3542	0.8861	0.4196	0.8992	0.9514	0.6573	-0.047	-0.0564	0.0272	-0.0228	-0.0504	-0.1276	0.0992
418	-0.0964	-0.0925	0.0789	-0.059	0.0517	-0.0247	-0.1192	-0.0299	-0.0856	1.3029	2.3609	1.7015	1.3635	1.7023	1.4533	1.6339	1.2088	2.8211	1.3257	1.0289	0.9703	0.3686	0.4595	1.0126	0.9697	0.3242	1.2992	1.0197	0.946	0.7285	0.581	0.1919	0.1311	0.5588	1.1888	1.0476	1.3322	0.7441	0.4276	0.8982	0.8954	0.8803	-0.06	-0.1054	-0.0338	-0.1678	-0.1034	-0.0946	0.0542
420	-0.1274	-0.1575	-0.1391	-0.016	0.0497	0.0223	-0.0542	-0.0709	-0.0236	1.2069	2.0619	1.8425	1.2125	1.5063	1.5203	1.6369	1.1348	3.3521	1.2687	0.8829	1.0903	0.4696	0.6775	0.6616	0.8717	0.4942	1.5712	0.9577	0.785	0.8195	0.581	0.3499	0.2021	0.6438	1.3188	0.8216	1.2292	0.9541	0.5266	0.8992	0.8444	0.6233	-0.036	-0.1184	-0.1188	0.0552	-0.0494	-0.1246	0.0442
422	-0.1674	-0.0735	0.1199	-0.007	0.1157	0.0643	-0.0492	-0.0759	-0.0266	1.4919	2.2629	1.9665	1.1945	1.4773	1.4813	1.6779	1.1928	3.1961	1.2527	0.8429	1.4603	0.4286	0.7475	0.3716	1.1317	0.7242	1.3332	1.0937	0.85	0.8675	0.656	0.3069	0.2521	0.6328	1.1478	0.9566	1.2682	0.9581	0.3266	0.9222	0.7094	0.7473	-0.094	-0.0984	-0.0998	-0.0158	-0.1154	-0.1846	0.1082
424	-0.1684	-0.1185	0.1669	-0.169	-0.0073	-0.0487	-0.0622	-0.1449	0.0084	1.4029	2.4889	2.1895	1.3725	1.4793	1.4983	1.6949	1.1968	3.2811	1.2897	0.8859	1.2253	0.4886	0.7785	0.4156	1.1017	0.6082	1.5822	0.9597	0.983	0.9775	0.55	0.2639	0.1991	0.7558	1.1168	1.0576	1.2792	0.7851	0.4696	0.9202	0.7794	0.6563	-0.024	-0.0464	-0.1598	0.0152	-0.2024	-0.1676	0.0972
426	-0.0624	-0.1595	0.1879	-0.157	0.0227	-0.0937	-0.1712	-0.1279	-0.0256	1.4349	1.9769	2.3085	1.5165	1.4563	1.5503	1.6559	1.1848	3.2581	1.1487	0.8049	1.2133	0.4956	0.6825	0.3066	1.0257	0.6232	1.3362	0.9997	0.91	0.8885	0.681	0.1519	0.1451	0.5768	1.1178	1.2276	1.2042	0.8341	0.4076	0.9142	0.7854	0.9023	-0.012	-0.0224	0.0412	0.1712	-0.1304	-0.1626	0.0522
428	-0.1934	-0.1335	0.0949	-0.028	-0.0163	0.0393	-0.0822	-0.0569	-0.0256	1.5169	1.9329	2.2485	1.3875	1.4273	1.5713	1.5289	1.0658	3.1541	1.2777	0.7669	1.0593	0.4006	0.7025	0.4776	1.1737	0.6442	1.1732	1.1537	0.897	0.7735	0.535	0.2359	0.1951	0.5998	1.1338	1.2146	1.4282	0.7861	0.3966	0.9252	0.7814	0.7693	-0.02	-0.1034	-0.0718	0.1212	-0.1044	-0.2236	0.0622
430	-0.1024	-0.0585	0.3019	-0.08	0.0227	0.0983	-0.1882	-0.0759	-0.0676	1.3439	1.8019	2.0495	1.2405	1.4383	1.5173	1.4659	1.1218	3.1431	1.2907	0.8729	0.9823	0.3986	0.6275	0.4836	1.1517	0.8042	1.0862	1.1597	0.971	0.8965	0.74	0.3129	0.2591	0.6118	1.1598	1.1786	1.3272	0.6931	0.4236	0.9832	0.8824	0.7293	-0.04	-0.0744	-0.0058	0.1842	-0.0834	-0.1736	0.0402
432	-0.1244	-0.2115	0.1139	-0.093	0.0597	-0.0467	-0.1082	-0.0289	-0.0786	1.6499	2.1709	1.6895	1.3435	1.5983	1.5053	1.5029	1.1548	2.9821	1.1497	0.8419	1.0043	0.7146	0.7315	0.4086	1.0987	0.5592	1.0072	1.1307	0.754	0.9145	0.633	0.3369	0.2491	0.5688	1.1788	1.2506	1.2382	0.8521	0.4656	0.9742	0.6314	0.6253	0.107	-0.0834	-0.0498	-0.0188	-0.0904	-0.1846	-0.0138
434	-0.1404	-0.0665	0.2409	-0.105	-0.0403	-0.0617	-0.0832	-0.0729	-0.0176	1.5019	1.8819	2.1865	1.3965	1.4583	1.5423	1.4479	1.1898	2.8781	1.2227	0.7359	1.1063	0.4276	0.5265	0.5836	0.8507	0.4562	0.9672	1.0397	0.847	0.9185	0.642	0.2419	0.2681	0.6318	1.1058	1.2506	1.2642	0.6791	0.3216	0.9932	0.7594	0.7673	-0.071	-0.0394	-0.0178	0.2142	-0.0704	-0.1436	0.0282
436	-0.1664	-0.1265	0.2549	-0.066	-0.0943	-0.0457	-0.0702	-0.0749	0.0084	1.3759	2.0799	1.9775	1.2765	1.4633	1.5453	1.4769	1.0988	3.2301	1.2217	0.7569	1.2073	0.5306	0.7275	0.4526	0.9427	0.3442	0.9992	1.0747	0.862	0.9505	0.629	0.2429	0.2461	0.5248	1.0968	1.1056	1.3982	0.6681	0.3776	1.0102	0.7734	0.6833	0.083	-0.1154	-0.1018	-0.1048	-0.0314	-0.0736	0.0762
438	-0.1914	-0.0445	0.2759	-0.029	-0.0653	-0.0867	-0.0332	-0.1039	-0.1386	1.2959	1.7529	1.8405	1.1885	1.5533	1.5123	1.4719	1.3268	2.9821	1.1727	0.8579	1.0373	0.5656	0.7135	0.6866	0.8647	0.3722	0.9182	1.1407	0.774	0.8935	0.695	0.3079	0.1651	0.7358	1.1128	1.2246	1.2042	0.7531	0.5656	0.9912	0.7994	0.6903	-0.04	-0.1384	-0.1738	0.0532	-0.0794	-0.2486	0.0072
440	-0.1604	-0.1105	0.1189	-0.129	0.0487	-0.0217	-0.1032	-0.0989	-0.1106	1.3759	1.6339	2.1135	1.2475	1.4673	1.4643	1.4959	1.2808	3.1821	1.2427	0.8309	1.1403	0.5856	0.5535	0.7606	1.0187	0.3182	0.9702	0.9947	0.688	0.8745	0.739	0.3609	0.2861	0.6658	1.1438	1.0936	1.3162	0.8071	0.3476	0.9992	0.8924	0.7103	-0.064	-0.0684	-0.0528	0.0282	-0.1044	-0.1486	0.0102
442	-0.0884	-0.1875	0.0359	-0.145	0.0357	0.0133	-0.1442	-0.0639	-0.0016	1.4629	1.6299	1.4005	1.2635	1.5293	1.4743	1.4629	1.1778	3.1001	1.2447	0.7299	1.2853	0.5176	0.6995	0.6316	0.9797	0.5502	0.8152	1.1187	0.792	0.9875	0.703	0.3679	0.2041	0.6288	1.1978	1.0326	1.4452	0.8311	0.4556	0.9472	0.6824	0.8623	-0.025	-0.0484	-0.1288	-0.0548	-0.1414	-0.0906	0.0942
444	-0.0824	-0.1265	0.0179	-0.063	0.0237	0.0573	-0.1112	-0.1019	0.0114	1.8319	1.7229	1.6945	1.2865	1.6743	1.4473	1.4849	1.3028	2.8191	1.3487	0.6859	1.6523	0.6226	0.6315	0.5586	1.0047	0.2172	1.0312	1.0067	0.729	0.9605	0.642	0.2619	0.2691	0.6588	1.1438	0.9406	1.4612	0.5861	0.4446	0.9782	0.8744	0.8053	-0.02	-0.1064	-0.0388	-0.0058	-0.0904	-0.1426	0.1052
446	-0.1294	-0.0875	0.1539	-0.066	0.0697	0.1453	-0.0712	-0.1429	-0.0316	1.5049	1.8999	1.8955	1.2245	1.6493	1.3873	1.4289	1.2878	3.0331	1.3007	0.8239	1.2083	0.4896	0.7165	0.5606	0.9957	0.3072	0.8252	1.0567	0.631	0.9015	0.709	0.3649	0.1751	0.5268	1.0938	1.0696	1.4082	0.8821	0.3396	0.9622	0.8824	0.5863	-0.081	-0.1074	-0.0928	-0.0168	-0.0714	-0.2196	0.0572
448	-0.1854	-0.1985	0.1819	-0.101	0.0257	0.0573	-0.0722	-0.1279	0.0224	1.6629	1.9159	1.4295	1.3255	1.6973	1.4243	1.4119	1.2928	3.4951	1.3347	0.7179	1.3423	0.5316	0.6105	0.7236	0.8377	0.1452	0.8962	1.0437	0.718	1.0415	0.811	0.2599	0.2131	0.5798	1.0798	0.9026	1.2482	0.9701	0.3316	1.0082	0.7724	0.6913	-0.068	-0.0684	-0.1128	-0.0388	-0.1324	-0.2976	0.0522
450	-0.1334	-0.1115	0.0359	-0.074	0.0837	-0.0147	-0.0632	-0.1349	-0.0656	1.3199	1.9269	1.3815	1.3885	1.6973	1.5233	1.4369	1.4078	2.9121	1.2977	0.7149	1.6793	0.4096	0.5385	0.5886	0.8357	0.1362	0.9872	0.9677	0.625	1.1985	0.813	0.3089	0.1061	0.6018	1.0168	0.9136	1.4012	0.9241	0.4566	0.9352	0.8154	0.4933	0.017	-0.0674	0.0192	0.1752	-0.0834	-0.1406	0.0442
452	-0.0974	-0.0805	0.0539	-0.127	0.0147	0.1333	-0.0272	-0.0869	-0.1016	1.4459	1.6279	1.4915	1.4045	1.5093	1.3513	1.3969	1.4598	2.9861	1.2947	0.6869	1.5563	0.4386	0.5965	0.3516	0.8677	0.2062	0.8562	0.9547	0.644	1.0445	0.786	0.2359	0.2051	0.5398	1.0348	0.9816	1.2492	0.8461	0.2956	0.9842	0.6594	0.5123	-0.042	-0.0504	0.0592	-0.1518	-0.1454	-0.2056	0.0102
454	-0.1254	-0.0835	0.1689	-0.092	0.0027	-0.0057	-0.1802	-0.1159	-0.0216	1.4319	1.7839	1.2715	1.4735	1.5803	1.3673	1.5109	1.3858	3.0161	1.2537	0.6769	1.6683	0.2686	0.6805	0.4256	0.7647	0.2462	0.8832	1.0287	0.618	0.9625	0.86	0.1689	0.2261	0.4718	0.9968	1.1146	1.4392	0.9401	0.4596	0.9932	0.8074	0.5273	-0.046	-0.0704	0.0112	-0.1508	0.0156	-0.3066	0.1652
456	-0.1094	-0.1635	-0.1171	-0.072	0.0017	0.0933	-0.1792	-0.0919	0.0184	1.3159	1.5589	1.1955	1.6805	1.6333	1.3413	1.5899	1.4678	2.9801	1.3857	0.8119	1.4383	0.3726	0.7125	0.4806	0.9817	0.1842	0.9362	1.1217	0.577	0.9145	0.891	0.1989	0.3551	0.4688	1.0238	1.0226	1.3412	0.7211	0.4556	0.8712	0.7534	0.6603	-0.035	-0.1184	-0.0388	-0.0898	-0.1104	-0.1806	0.0652
458	-0.0764	-0.1635	0.1149	-0.041	0.0847	-0.0017	-0.2062	-0.1299	-0.0306	1.2939	1.5839	1.1725	1.7255	1.6053	1.3923	1.6089	1.3368	3.2291	1.3927	0.6649	1.1303	0.2666	0.6315	0.4046	1.1027	0.2862	0.9212	1.0797	0.576	0.8135	0.858	0.3229	0.2751	0.6448	0.9548	1.0986	1.2692	0.8251	0.4806	0.9012	0.7474	0.5643	-0.075	-0.1254	-0.1428	-0.1258	0.0006	-0.2106	0.0752
460	-0.1944	-0.0835	0.1319	-0.055	0.0127	-0.0267	-0.2322	-0.1209	0.0104	1.4239	1.4199	1.2525	1.8105	1.6633	1.3873	1.5769	1.4468	3.3101	1.4867	0.7469	1.3963	0.3916	0.7325	0.5046	0.9147	0.2042	0.7882	1.0307	0.643	0.8895	0.833	0.2919	0.1991	0.3828	0.9848	1.0866	1.2352	1.0171	0.4596	0.9182	0.7454	0.6993	0.032	-0.0114	-0.0928	0.0452	-0.1244	-0.2086	0.0512
462	-0.1484	-0.1395	0.0089	-0.074	0.0997	-0.0637	-0.1842	-0.1149	-0.0906	1.1139	1.3279	1.2685	1.7385	1.8283	1.4093	1.5759	1.2918	3.5741	1.5107	0.8559	1.0433	0.4126	0.6995	0.6636	0.9377	0.2402	0.8222	1.0417	0.632	0.8365	0.686	0.2589	0.1421	0.5028	0.9578	1.0636	1.1292	0.9601	0.4546	0.9352	0.7944	0.6453	0.037	-0.0964	-0.0968	-0.0908	-0.1204	-0.1176	0.1182
464	-0.0534	-0.1435	-0.0151	-0.133	0.0607	-0.0067	-0.1302	-0.0979	-0.0506	1.2409	1.5839	1.1655	1.6975	1.6943	1.3153	1.6769	1.2998	3.3191	1.5817	0.8389	1.0893	0.2536	0.7215	0.4636	0.9497	0.3362	1.0022	1.1187	0.578	0.7995	0.616	0.2769	0.2111	0.5708	0.9828	0.8626	1.1772	0.9051	0.5456	0.8772	0.7744	0.6723	-0.043	-0.0734	-0.1108	0.1492	-0.1014	-0.1866	0.0612
466	-0.1654	-0.1385	0.1039	-0.072	-0.0793	-0.0537	-0.0962	-0.0859	-0.1526	1.1389	1.3669	1.1055	1.9645	1.7053	1.3543	1.5879	1.4548	3.4121	1.5207	0.7239	1.2213	0.4756	0.8585	0.4756	0.9817	0.4002	0.9732	1.1097	0.688	0.8335	0.673	0.3449	0.2481	0.3878	1.0828	0.8636	1.0422	0.9241	0.6006	0.8872	0.7614	0.6273	-0.02	-0.1154	-0.0308	0.0302	-0.2034	-0.1726	0.1722
468	-0.1324	-0.0915	0.1849	-0.048	0.1997	-0.0137	-0.1312	-0.1049	-0.0796	1.2409	1.5269	1.2165	1.8835	1.7173	1.2903	1.5709	1.4498	2.7691	1.4357	0.9079	2.0813	0.5536	0.7905	0.5836	0.9887	0.4282	0.8252	0.9697	0.629	0.9145	0.864	0.2959	0.2011	0.5608	1.0478	1.1646	1.0512	1.4481	0.5976	0.8752	0.7424	0.5863	-0.045	-0.0344	0.0342	-0.0398	-0.1774	-0.1486	0.1132
470	-0.0724	-0.1435	0.2279	-0.088	-0.0863	-0.0187	-0.0742	-0.0819	-0.0786	1.2239	1.3799	1.0085	1.8385	1.7873	1.3083	1.4669	1.4408	3.0411	1.2227	0.9179	1.3343	0.4406	0.7085	0.5416	0.7817	0.5252	0.8732	0.9177	0.548	0.9005	0.807	0.2339	0.2281	0.6478	1.0918	1.1056	1.0962	1.1581	0.5686	0.7472	0.8664	0.5953	0.058	-0.0014	-0.1638	-0.1348	-0.0694	-0.1306	0.1482
472	-0.1854	-0.1625	0.1339	-0.146	0.0167	-0.0497	-0.0732	-0.0479	-0.0666	0.8919	1.4959	1.1615	1.9875	1.6973	1.3073	1.5379	1.4488	2.8921	1.3197	1.1039	1.3903	0.5426	0.6365	0.6626	0.8347	0.4232	0.9662	1.0457	0.559	0.8435	0.793	0.2629	0.2361	0.6238	1.0228	1.0846	1.0762	1.3261	0.5356	0.8622	0.8124	0.5953	-0.038	-0.1234	0.0212	-0.0668	-0.0484	-0.1976	0.0962
474	-0.1244	-0.1355	0.0549	-0.105	0.0257	-0.0487	-0.2092	-0.0849	-0.0666	1.1229	1.4749	1.0555	1.7305	1.7613	1.3243	1.5249	1.2818	2.8991	1.2727	1.0819	1.3613	0.6916	0.7935	0.5016	0.9187	0.4812	0.9572	1.0817	0.576	0.8275	0.826	0.3219	0.2361	0.5448	1.0618	1.0146	1.0522	1.3921	0.5066	0.9002	0.8384	0.5183	0.078	-0.1084	-0.0218	-0.0818	-0.0754	-0.2436	0.1812
476	-0.0784	-0.1755	0.1559	-0.076	-0.0303	-0.1397	-0.1252	-0.1059	-0.0526	1.4809	1.4709	1.1575	1.6745	1.7213	1.4003	1.5559	1.3298	2.8841	1.4397	0.9749	1.6433	0.5486	0.8005	0.6456	0.9417	0.6772	0.9152	1.0667	0.623	0.8745	0.899	0.3209	0.2211	0.5988	1.0958	1.0556	1.1222	1.2751	0.5226	0.8192	0.7914	0.6343	0.06	-0.1084	-0.0158	-0.0738	-0.0754	-0.1596	0.1932
478	-0.0554	-0.1275	0.1039	0.018	0.0057	-0.0097	-0.1622	-0.0669	-0.0376	1.2539	1.7019	1.2585	1.5925	1.6253	1.3623	1.6779	1.4088	3.2141	1.5547	0.9099	1.5403	0.6896	0.6735	0.4296	1.0577	0.6242	0.9632	1.0207	0.537	0.9365	0.894	0.2699	0.2281	0.5458	1.0798	0.8766	1.1282	1.3351	0.6736	0.8762	0.7154	0.5423	0.041	-0.0764	-0.0208	-0.0088	-0.1274	-0.2736	0.1652
480	-0.2654	-0.1265	0.2349	-0.281	-0.0553	-0.0247	-0.1952	-0.0849	-0.0546	1.5499	1.3799	1.1675	1.7105	1.4973	1.3633	1.6499	1.3208	3.3341	1.3767	0.8539	1.9233	0.4026	0.7135	0.5096	0.9277	0.5472	0.9082	1.0747	0.647	0.8715	0.722	0.4239	0.3641	0.3418	1.0158	1.1646	1.1672	1.3131	0.4796	0.8872	0.6604	0.5853	0.024	-0.0344	-0.0598	-0.1048	-0.1644	-0.1856	0.1652
482	-0.1324	-0.1925	0.0389	-0.059	-0.0763	-0.0957	-0.0972	-0.1209	-0.0226	1.4239	1.1339	1.1135	1.6205	1.6583	1.3753	1.6089	1.4198	3.3051	1.3007	0.7989	1.5043	0.4306	0.6175	0.6766	0.7907	0.6142	1.1572	1.0097	0.605	1.1445	0.59	0.3329	0.3291	0.5458	1.0368	1.1626	1.1962	1.2701	0.5126	0.7262	0.8574	0.6213	0.007	-0.1484	-0.0858	0.0282	-0.0944	-0.2676	0.2132
484	-0.0804	-0.1225	0.0049	-0.103	0.0617	-0.0777	-0.2222	-0.1409	-0.0946	1.0309	1.2619	0.9865	1.6295	1.6793	1.3703	1.6239	1.3558	3.1861	1.3117	0.8599	1.0303	0.5836	0.6105	0.8616	0.7807	0.6102	1.0682	1.0407	0.671	1.0895	0.553	0.2639	0.3161	0.6388	1.0448	1.1656	1.2752	1.1381	0.4246	0.8252	0.8854	0.4963	0.047	-0.1424	-0.0498	0.0332	-0.1104	-0.1656	0.0452
486	-0.1534	-0.1855	0.1629	-0.073	-0.0453	-0.0957	-0.1512	-0.0849	0.0624	1.0979	1.3549	1.0155	1.5585	1.6243	1.3693	1.6419	1.4358	3.0581	1.3257	0.9089	1.6503	0.5116	0.6525	0.6826	0.8727	0.4882	1.0462	1.0057	0.683	0.8695	0.646	0.2949	0.2161	0.4468	1.0928	1.0306	1.2272	1.1261	0.5166	0.7932	0.6894	0.6843	-0.04	-0.1624	-0.0828	-0.0108	0.0236	-0.1746	0.1972
488	-0.2354	-0.1805	0.0829	-0.171	0.0527	-0.0477	-0.1532	-0.0269	-0.1526	0.9859	0.9419	0.9735	1.4945	1.5283	1.3143	1.6299	1.3558	3.7141	1.3607	0.9019	1.4193	0.6406	0.6355	0.6676	1.0017	0.5632	1.0752	1.0787	0.726	0.8725	0.642	0.4009	0.3031	0.5658	1.1548	1.0116	1.2152	1.2561	0.4196	0.8252	0.5774	0.6153	0.004	-0.1284	-0.1898	-0.0538	-0.0864	-0.2836	0.1772
490	-0.1784	-0.0995	-0.0151	-0.059	0.0947	-0.0077	-0.3092	-0.0609	-0.0526	0.9319	1.3199	1.0415	1.5895	1.6113	1.3703	1.6059	1.3708	3.7681	1.4057	0.8949	1.4043	0.3936	0.6485	0.6976	0.9727	0.6022	1.0082	1.0197	0.74	0.9615	0.732	0.5029	0.3191	0.5598	1.0518	1.0106	1.2102	1.3351	0.6286	0.7452	0.8304	0.5143	0.048	-0.0834	-0.1328	-0.1108	-0.1084	-0.2296	0.1992
492	-0.0884	0.0055	0.0929	-0.096	-0.0793	-0.0347	-0.2072	-0.0739	0.0324	0.7269	1.1619	1.1015	1.6355	1.6643	1.3323	1.5599	1.3328	4.1541	1.2137	0.8669	1.4853	0.3216	0.5855	0.4836	1.0477	0.5842	0.9992	1.0877	0.75	1.1255	0.592	0.3999	0.3271	0.6708	0.9938	0.9896	1.1242	1.5531	0.5656	0.7892	0.7034	0.4203	0.037	-0.1474	0.0062	0.1402	-0.2034	-0.2256	0.0862
494	-0.1734	-0.0775	0.2919	-0.052	-0.0693	-0.0047	-0.1572	-0.1239	-0.0366	0.6729	1.4939	1.0095	1.6895	1.5453	1.3853	1.5109	1.1588	5.3181	1.2197	0.9039	1.4813	0.3366	0.7015	0.8256	1.2547	0.5812	0.8642	1.0317	0.787	1.1365	0.706	0.3829	0.2011	0.6288	1.0438	1.0476	1.0442	1.9431	0.5736	0.8312	0.6674	0.7133	-0.036	-0.1144	-0.0838	0.0722	-0.0404	-0.1726	0.1382
496	-0.1554	-0.1255	0.1609	-0.109	0.0437	-0.0677	-0.1962	0.0121	-0.0186	0.7529	1.4859	0.9295	1.5815	1.5973	1.3093	1.6069	1.1918	3.8531	1.2177	0.9009	1.3623	0.4096	0.7975	0.4186	1.0477	0.6452	0.8962	1.1657	0.7	1.0985	0.666	0.4039	0.2921	0.7238	1.0248	1.2116	1.1172	1.6391	0.6326	0.8142	0.7474	0.6533	-0.029	-0.0564	0.0352	-0.0658	-0.1044	-0.2456	0.0822
498	-0.0364	-0.1755	0.0639	-0.229	-0.0253	-0.0727	-0.0712	-0.0519	-0.0486	0.8519	1.7509	0.6935	1.5755	1.5883	1.2843	1.6319	1.1988	4.2441	1.2157	0.8799	1.0623	0.4536	0.6485	0.6416	1.1407	0.5192	0.9072	1.0457	0.716	1.1905	0.862	0.3439	0.1891	0.6068	1.0628	1.1036	1.0972	1.5741	0.4836	0.8392	0.7094	0.5603	0.05	-0.0394	0.0052	0.0092	-0.1584	-0.1536	0.0802
500	-0.1194	-0.1685	0.1899	-0.253	0.1007	0.0083	-0.1382	-0.0459	-0.0486	0.8309	1.4149	0.6155	1.6775	1.5683	1.3563	1.8559	1.2558	4.6941	1.2147	0.7739	1.2763	0.6536	0.6405	0.3256	0.8167	0.6092	0.8662	0.9907	0.789	1.0255	0.824	0.3619	0.2201	0.5198	1.0218	0.9816	1.1312	1.4801	0.5856	0.7812	0.7184	0.5133	-0.008	-0.1174	-0.0568	-0.0248	-0.1624	-0.1466	0.2102
502	-0.1464	-0.0585	0.1869	-0.208	0.1247	-0.0607	-0.1842	-0.0669	-0.0546	0.7769	1.1439	0.5895	1.4795	1.4523	1.3583	1.7179	1.0808	4.2381	1.2287	0.7419	1.9083	0.5206	0.6585	0.7656	0.8757	0.6622	0.8042	1.1257	0.652	1.0625	0.911	0.3319	0.1931	0.5888	1.0318	1.0426	1.1512	1.3741	0.6166	0.6872	0.7734	0.6813	-0.037	-0.2184	-0.1038	-0.0218	-0.0354	-0.2316	0.2672
504	-0.1204	-0.1035	0.2229	-0.144	0.0907	-0.0027	-0.2282	-0.1399	-0.1016	0.8189	1.2969	0.5735	1.7065	1.6063	1.3533	1.7539	1.2068	4.7001	1.1497	0.6889	1.0063	0.4026	0.4465	0.5356	0.7667	0.7022	0.7752	1.2077	0.697	0.9805	0.963	0.3659	0.2331	0.7318	1.0748	1.1826	1.0662	1.3541	0.5066	0.7802	0.8804	0.6343	-0.054	-0.1114	-0.1048	-0.0558	-0.1414	-0.0776	0.3272
506	-0.1554	-0.0915	-0.0601	-0.091	-0.0523	-0.0127	-0.1662	-0.0319	-0.0376	1.0099	1.4599	0.4595	1.2825	1.8103	1.2803	1.6289	1.0658	4.6071	1.1807	0.7819	1.0253	0.3136	0.4955	0.6906	0.8777	0.6702	0.6882	1.1947	0.682	0.9495	0.781	0.2519	0.3681	0.6398	1.1148	1.1016	1.0672	1.1931	0.5206	0.7902	0.8434	0.6073	-0.02	-0.1314	-0.1168	-0.0658	-0.0434	-0.0836	0.2582
508	-0.0194	-0.0495	0.0259	-0.135	-0.0233	-0.0937	-0.0592	-0.1299	0.0264	0.9389	1.6109	0.5585	1.3925	1.7113	1.3213	1.7899	1.0858	4.7031	1.1587	0.7839	0.8843	0.3346	0.4895	0.4326	1.0187	0.9782	0.7482	1.2447	0.57	1.1015	0.796	0.2329	0.4501	0.6708	1.1778	0.9366	1.0632	0.9911	0.4796	0.9642	0.8204	0.7153	0.116	-0.1484	-0.0218	0.0062	-0.1614	-0.1036	0.2942
510	-0.1034	-0.0935	0.0019	-0.125	-0.0213	-0.1027	-0.0502	-0.0909	0.0104	0.7729	1.2499	0.5065	1.5465	1.6693	1.3393	1.8579	1.1168	3.8931	1.1537	0.7289	0.8543	0.3136	0.5675	0.4256	1.0757	0.6072	0.8782	1.1367	0.743	0.9445	0.853	0.3169	0.2941	0.7848	1.0578	1.1576	1.2002	0.8981	0.4646	0.8862	0.8494	0.4743	0.095	-0.0824	-0.0528	-0.0198	-0.0174	-0.0966	0.1932
512	-0.1144	-0.0405	0.0209	-0.047	0.0417	0.0193	-0.0892	-0.0839	-0.0466	0.9709	1.4769	0.5905	1.5565	1.7373	1.3023	1.8959	1.2218	4.0911	1.0927	0.7369	1.1883	0.4756	0.5185	0.5826	1.3037	0.6692	0.9052	1.2497	0.716	0.8415	0.793	0.2879	0.2421	0.7728	1.0688	1.1266	1.1522	1.0571	0.5926	0.9122	0.8274	0.6713	0.003	-0.1424	-0.1178	-0.0518	-0.0734	-0.2776	0.1762
514	-0.1544	-0.1025	0.1839	-0.216	-0.0563	0.0723	-0.0732	-0.0749	-0.0716	0.7499	1.5969	0.6525	1.4875	1.7123	1.3663	1.9319	1.1588	4.3911	1.1837	0.6219	1.2483	0.4146	0.5635	0.5236	1.0477	0.4722	0.7652	1.0757	0.739	0.7975	0.789	0.2319	0.3971	0.5828	0.9348	1.3266	1.1152	1.4971	0.6486	0.9552	0.8074	0.7113	-0.007	-0.0334	-0.0168	0.0032	-0.1184	-0.2076	0.3262
516	-0.1834	-0.1295	0.2679	-0.093	-0.1163	-0.0067	-0.1082	-0.0769	-0.0476	0.9229	2.3469	0.7235	1.5035	1.6283	1.3543	1.8559	1.0958	3.9291	1.1187	0.6849	1.3323	0.5386	0.6495	0.6686	1.0917	0.6392	0.8522	1.0307	0.616	1.0735	0.753	0.3539	0.3891	0.5608	0.9158	1.2916	1.1612	1.1731	0.6806	0.9382	0.9334	0.5723	0.06	-0.1114	-0.1008	-0.1178	0.0256	-0.2566	0.3892
518	-0.2444	-0.0125	0.0429	-0.072	-0.1023	-0.0317	-0.1552	-0.0339	-0.0176	0.8689	2.0149	0.7025	1.4325	1.7583	1.2803	1.8389	1.0808	3.4991	1.1137	0.6079	1.7363	0.4726	0.6605	0.4526	0.9137	0.7142	0.9932	1.1057	0.633	0.9825	0.769	0.2639	0.3011	0.6668	0.9298	1.3916	1.1022	1.4531	0.5256	0.8962	0.9234	0.6883	0.058	-0.1634	-0.0488	-0.1468	-0.1354	-0.1386	0.2542
520	-0.0624	-0.1185	0.0719	-0.16	0.1097	-0.0257	-0.1972	-0.0369	-0.0926	0.8639	1.2949	0.7365	1.3445	1.6933	1.3293	1.7369	1.1158	3.2131	1.1107	0.6229	1.8113	0.4946	0.6045	0.4436	1.0137	0.4322	0.8792	1.2897	0.607	0.9505	0.806	0.3539	0.3461	0.4788	0.9248	1.0986	1.1292	0.9401	0.6176	0.9712	0.8974	0.6343	0.065	-0.0044	0.0052	-0.0158	-0.0594	-0.1446	0.2682
522	-0.1214	-0.0525	0.1339	-0.152	0.1077	-0.0587	-0.1492	-0.0289	0.0034	0.6679	1.3769	0.5555	1.3305	1.6873	1.3333	1.7209	1.1798	4.1601	1.1107	0.7059	1.8713	0.5716	0.5735	0.5246	0.8527	0.5482	0.8302	1.2227	0.571	0.9215	0.896	0.3699	0.3611	0.6348	1.0018	1.0786	1.2412	1.2141	0.7836	0.8922	0.9724	0.6943	0.066	-0.0644	-0.1068	-0.0888	-0.1134	-0.0966	0.2782
524	-0.1454	-0.0995	0.1799	-0.054	-0.0443	-0.0867	-0.1842	0.0201	0.0044	0.7889	1.2389	0.5895	1.3385	1.8063	1.3793	1.6499	1.3298	4.0811	1.1017	0.7169	1.5323	0.5466	0.6195	0.4266	0.8007	0.5922	0.8692	1.1217	0.642	0.9285	0.879	0.2609	0.3691	0.6118	0.9538	0.9456	1.2082	1.0861	0.6296	1.0242	1.0784	0.6453	-0.038	-0.0734	-0.0558	-0.0658	-0.1294	-0.1426	0.2642
526	-0.1754	-0.1925	0.1219	0.016	0.0147	-0.0877	-0.1592	-0.0659	-0.0766	0.7369	1.4449	0.6645	1.2745	1.6903	1.4293	1.6049	1.2688	4.6661	1.1397	0.8109	2.0383	0.3476	0.6045	0.4086	0.6697	0.5802	0.8792	1.1777	0.67	1.0945	0.796	0.5299	0.3221	0.6078	0.9018	0.9686	1.1702	1.0931	0.6156	1.0422	0.9824	0.5703	0.041	-0.0454	-0.0758	-0.1328	-0.1524	-0.1896	0.2792
528	-0.2304	-0.1245	0.0009	-0.101	0.0097	-0.0387	-0.1292	-0.0379	-0.1136	0.8919	1.2849	0.6155	1.4305	1.6663	1.3573	1.6139	1.3368	3.8101	1.0887	0.7079	1.5003	0.4176	0.4895	0.4316	0.8887	0.4312	0.8312	1.1127	0.624	0.9565	0.686	0.2919	0.2921	0.4428	0.8808	0.9646	1.1772	0.9881	0.6986	0.9802	1.1124	0.7003	-0.005	-0.0574	-0.0818	-0.0788	-0.1394	-0.2916	0.2392
530	-0.2024	-0.0935	0.1499	-0.006	0.0167	-0.0117	-0.0802	-0.0829	-0.0116	0.6299	1.2269	0.6565	1.2615	1.6973	1.3223	1.6379	1.3858	4.2101	1.1017	0.7319	3.3633	0.3556	0.6645	0.5706	0.8637	0.3672	0.9322	1.0847	0.568	1.0785	0.768	0.5469	0.4241	0.5838	0.9188	1.0126	1.2572	0.9671	0.6956	0.9952	0.9394	0.6713	0.091	-0.0554	-0.1408	-0.0528	-0.1484	-0.0446	0.1762
532	-0.0834	-0.0735	0.0829	-0.061	-0.0103	-0.0097	-0.2672	-0.0779	-0.0896	0.8869	1.5519	0.6445	1.1645	1.6143	1.3913	1.7529	1.2458	4.2051	1.1387	0.7049	3.5153	0.2546	0.5835	0.5846	0.7937	0.6772	1.1862	1.1447	0.595	1.1635	0.667	0.6039	0.3071	0.5068	0.9398	1.0376	1.2732	1.0071	0.5706	1.0532	0.9244	0.7083	-0.041	-0.0684	-0.0618	-0.1578	-0.1584	-0.2436	0.0452
534	-0.1284	-0.0865	0.0809	-0.18	0.0237	-0.0657	-0.2652	-0.0339	-0.0796	0.6669	1.5499	0.6015	1.3475	1.7133	1.4063	1.7159	1.3668	4.6871	1.0327	0.7149	2.3253	0.4266	0.6325	0.4576	0.7877	0.6722	0.9592	1.1457	0.733	1.2225	0.647	0.3229	0.3211	0.5178	0.9168	1.2006	1.2882	1.0521	0.8626	0.8852	0.8664	0.6703	-0.023	-0.0814	-0.0908	-0.1088	-0.1104	-0.1996	0.1102
536	-0.0894	-0.0665	0.0139	-0.102	-0.0153	0.0073	-0.1422	-0.0689	-0.1366	0.7609	1.2039	0.5205	1.2575	1.8213	1.4753	1.6369	1.3548	4.4921	1.2047	0.8379	2.7163	0.2116	0.6605	0.4626	0.9087	0.4052	0.9182	1.2627	0.705	1.2405	0.637	0.3809	0.3011	0.5738	1.0228	1.1726	1.2282	1.0111	0.7176	1.0672	0.9594	0.7223	-0.023	-0.1634	0.0002	0.0142	-0.0184	-0.1106	0.0972
538	-0.2124	-0.1295	0.2849	-0.115	0.0867	-0.1027	-0.1632	-0.0739	-0.0316	0.8159	1.2589	0.5805	1.2515	1.7203	1.3873	1.6629	1.3368	4.6521	1.1167	0.8119	2.6223	0.4026	0.7735	0.3926	0.8237	0.3602	0.9512	1.2177	0.573	1.3575	0.611	0.3189	0.2691	0.6778	0.9778	1.0586	1.4172	1.2101	0.7216	0.9582	0.8544	0.7263	0.082	-0.0764	-0.0458	-0.0878	-0.1934	-0.1756	0.1592
540	-0.2044	-0.1545	-0.0051	-0.166	-0.1183	-0.0847	-0.2372	-0.1119	-0.0066	0.8049	0.9469	0.5715	1.2825	1.7923	1.4423	1.6049	1.4238	4.1301	1.0307	0.8319	2.1833	0.6886	0.7375	0.2706	0.9117	0.5822	0.8142	1.2037	0.562	1.0015	0.71	0.2019	0.3491	0.5078	0.9148	1.1686	1.3592	1.0021	0.7446	1.0342	0.9534	0.7543	0.088	-0.0534	-0.0258	-0.1028	-0.0714	-0.0866	0.0912
542	-0.0264	-0.0455	0.1989	-0.127	0.0317	0.0083	-0.1812	-0.0119	-0.1196	0.7919	1.0309	0.6055	1.2635	1.7913	1.4573	1.5519	1.2088	3.4741	1.0627	0.7059	1.6943	0.6436	0.7385	0.3246	1.0177	0.5562	0.7922	1.1767	0.619	0.9695	0.615	0.1979	0.3081	0.3788	0.9588	1.3386	1.3782	0.9551	0.8136	0.9502	0.9014	0.5953	0.048	0.0126	-0.0798	-0.1138	-0.1514	-0.0996	0.0942
544	-0.1464	-0.0515	0.2109	-0.048	-0.0063	-0.0357	-0.2382	-0.0409	-0.0626	0.8929	1.5169	0.6025	1.2445	1.7033	1.4363	1.6079	1.2678	3.2041	1.1297	0.7729	1.5143	0.5196	0.7065	0.2746	1.0047	0.4092	0.9102	1.1947	0.666	1.0295	0.65	0.2339	0.2791	0.4818	0.9798	1.3456	1.4022	0.9801	0.6676	0.9462	0.9084	0.5253	0.155	-0.0044	-0.1028	-0.0638	-0.0474	-0.1756	0.1712
546	0.0676	-0.1635	0.1939	-0.084	0.0427	-0.1497	-0.2032	-0.0069	-0.0526	0.8419	0.9429	0.6945	1.2715	1.6373	1.4743	1.6069	1.3968	4.0191	1.1607	0.7489	0.9803	0.9366	0.9315	0.3296	1.2167	0.4632	0.8572	1.1797	0.671	0.9505	0.704	0.2509	0.2731	0.5578	0.9958	1.4276	1.4712	1.2471	0.8136	0.8532	0.9264	0.6083	0.164	-0.0484	-0.1388	-0.1178	-0.0034	-0.1826	0.0012
548	-0.1374	-0.1505	0.1879	-0.121	-0.0293	-0.0067	-0.1432	-0.0799	-0.0346	0.6879	1.2289	0.6465	1.1945	1.7873	1.4183	1.5579	1.3238	3.8261	1.1087	0.8759	0.9823	0.7846	0.9775	0.4156	1.2917	0.6092	0.9802	1.1267	0.528	1.0465	0.677	0.2829	0.4031	0.3758	1.0148	1.1396	1.5002	1.4411	0.7246	0.8732	0.9814	0.6953	0.209	-0.0314	-0.0208	0.0362	-0.1484	-0.1666	0.0992
550	-0.1294	-0.1885	0.0429	-0.136	-0.0823	0.0903	-0.2482	-0.0399	-0.0056	0.8389	1.1779	0.5915	1.2595	1.6223	1.4673	1.5519	1.3448	3.3341	0.9467	0.7789	1.0923	1.0126	0.7835	0.2446	1.3047	0.4912	1.0142	1.1087	0.639	1.0395	0.672	0.2299	0.3801	0.5868	0.9918	1.0096	1.5212	1.2611	0.7626	0.8292	1.0124	0.7923	0.061	-0.0214	-0.1138	0.0242	-0.0194	-0.1166	0.0882
552	-0.2074	-0.1325	0.1319	-0.086	-0.0053	0.0503	-0.1552	-0.0339	0.0284	0.5989	0.9639	0.7425	1.2645	1.7573	1.4663	1.6229	1.3058	3.4251	1.0317	0.7359	1.3383	0.5406	0.8655	0.4356	0.9717	0.6032	0.7732	1.0897	0.636	1.0255	0.633	0.3649	0.2941	0.6498	0.9598	1.0336	1.4732	1.3321	0.6616	0.8692	0.9864	0.5633	0.146	-0.1244	-0.0348	0.0932	-0.0794	-0.1756	0.1672
554	-0.0914	-0.0805	-0.0001	-0.013	-0.0023	-0.0447	-0.2012	-0.0309	-0.0556	0.6239	0.9979	0.7225	1.3005	1.6363	1.3903	1.5779	1.4038	3.9981	0.9407	0.7109	1.0993	0.6586	0.9135	0.2436	1.1007	0.5862	0.9172	1.0807	0.59	1.0995	0.525	0.2589	0.3651	0.5158	0.9318	1.1556	1.4322	1.0431	0.8436	0.8032	0.9944	0.8753	0.175	-0.0894	-0.0848	0.0702	-0.0864	-0.1606	0.1312
556	-0.1094	-0.1805	0.0589	-0.162	0.0567	0.0433	-0.1432	-0.0789	-0.0076	0.7679	0.9189	0.8125	1.2685	1.6363	1.3353	1.6359	1.4728	3.9471	1.0277	0.8699	0.8213	0.7996	0.6665	0.3676	0.8817	0.5402	0.8442	1.0407	0.677	1.0515	0.684	0.2739	0.2511	0.7128	0.9868	1.3146	1.4312	1.3161	0.9116	0.8492	1.0494	0.7843	0.077	-0.1004	-0.0958	0.0232	-0.1494	-0.1436	0.2392
558	-0.2104	-0.1605	-0.0201	-0.129	0.0527	-0.0107	-0.2482	-0.0399	0.0564	0.5199	1.2619	0.7135	1.2175	1.7753	1.3833	1.5479	1.3598	3.9531	0.9897	0.8769	1.0113	0.7686	0.7245	0.3186	0.8277	0.4102	0.7412	1.0047	0.721	1.0905	0.718	0.1679	0.2911	0.5288	0.9978	1.2086	1.3232	1.1481	0.7546	0.7392	0.7784	0.7083	0.138	-0.0514	-0.0858	-0.0888	-0.1134	-0.1096	0.3622
560	-0.1864	-0.1235	0.1379	-0.022	-0.0213	-0.0347	-0.1312	-0.0999	-0.0436	0.6409	0.9949	0.9255	1.3345	1.7813	1.3513	1.5219	1.3228	3.5461	1.0637	0.8449	1.1403	0.6406	0.6475	0.3606	0.9137	0.5132	0.8582	1.0657	0.659	1.1755	0.712	0.2469	0.2081	0.5858	0.9828	1.0636	1.1782	1.2261	0.8216	0.7992	0.9924	0.6003	0.073	-0.1554	-0.0578	-0.0728	-0.1114	-0.0916	0.2472
562	-0.1894	-0.0595	0.3219	-0.177	0.0527	-0.0447	-0.2162	-0.1069	-0.0836	0.5889	0.9119	0.9745	1.2605	1.7953	1.3643	1.5699	1.2938	3.6631	1.0487	0.8619	1.2493	0.5386	0.6805	0.2676	0.8927	0.6232	0.9062	1.0397	0.843	1.1335	0.775	0.1969	0.1431	0.6308	1.0478	1.0816	1.3302	1.3681	0.6406	0.8252	0.7754	0.5783	0.129	-0.0594	-0.1168	-0.1258	-0.1474	-0.2546	0.2652
564	-0.1734	-0.1525	-0.0941	-0.23	0.0927	0.0003	-0.2522	-0.0719	0.0394	0.5729	1.1279	1.0375	1.2025	1.6543	1.3803	1.5569	1.3008	3.1231	1.1607	0.7709	0.9203	0.6266	0.8055	0.2926	0.8897	0.6572	0.8802	1.0207	0.843	1.3685	0.711	0.1379	0.2571	0.8568	1.0918	1.0316	1.4222	1.4071	0.7526	0.7962	0.7464	0.7183	-0.009	-0.0984	-0.0418	-0.0918	-0.2154	-0.2026	0.3672
566	-0.1444	-0.0875	0.0049	-0.153	-0.0123	0.0423	-0.2482	-0.0659	-0.0376	0.6039	1.0659	0.9335	1.1595	1.7733	1.3533	1.5739	1.2548	3.4311	1.2217	0.9119	0.8643	0.7086	0.6015	0.2146	0.9047	0.6902	0.8492	1.0817	0.769	1.3035	0.677	0.2539	0.2761	0.6068	1.0798	1.2026	1.2932	1.1131	0.6116	0.8422	0.9094	0.6373	0.07	-0.0834	-0.0358	-0.0818	-0.2354	-0.1656	0.3792
568	-0.1574	-0.0935	0.2489	-0.221	0.0167	-0.0657	-0.2452	-0.0819	-0.0176	0.8979	1.1319	0.9365	1.2285	1.8783	1.3993	1.5609	1.2658	3.7971	1.2187	0.9329	0.8133	0.6226	0.8365	0.1966	0.9367	0.6522	0.8682	0.9867	0.709	0.9675	0.568	0.1569	0.2271	0.6718	1.0848	1.1346	1.3602	1.0461	0.5906	0.7762	0.9684	0.5213	0.045	-0.0584	-0.0928	-0.1098	-0.1324	-0.2756	0.3422
570	-0.1204	-0.0825	0.1349	-0.112	-0.0443	-0.0197	-0.2022	-0.0909	-0.0646	0.8399	1.1599	0.9925	1.0645	1.8193	1.3703	1.6159	1.2098	4.0581	1.1727	0.8529	0.9093	0.8476	0.7565	0.3896	1.0827	0.4892	0.8692	1.0227	0.828	0.9825	0.621	-0.0221	0.3021	0.4788	1.0508	1.1226	1.3882	1.2071	0.7686	0.8372	0.8694	0.5013	0.044	-0.0784	-0.1178	-0.0408	-0.0784	-0.2246	0.2792
572	-0.0704	-0.0665	0.1769	-0.098	-0.0853	-0.0107	-0.2262	-0.0769	0.0094	0.7039	1.1529	1.1335	1.1375	1.8913	1.3703	1.6559	1.2478	3.7231	1.1657	0.8519	0.8373	0.6496	0.8425	0.3676	1.2237	0.7652	0.7952	1.0327	0.802	0.9435	0.612	-0.0081	0.2551	0.5378	1.0828	0.9926	1.2802	1.3231	0.6156	0.6812	0.8794	0.6083	0.129	-0.0334	-0.0418	-0.0758	-0.1474	-0.2546	0.3922
574	-0.1824	-0.0845	0.2269	-0.236	-0.0453	-0.0817	-0.1512	-0.0689	-0.0276	0.5979	1.1599	1.1575	1.0575	1.8653	1.4173	1.5799	1.2668	4.1411	1.1517	0.9099	0.8313	0.6916	0.6285	0.2306	1.2187	0.6702	0.8152	1.0187	0.702	0.9325	0.691	-0.0091	0.1961	0.5088	1.1028	0.8516	1.4122	1.0441	0.6116	0.7782	0.8294	0.4193	0.157	-0.0834	-0.1538	0.0892	-0.0214	-0.1576	0.3682
576	-0.0234	-0.0495	0.1649	-0.169	-0.0113	-0.0347	-0.1532	-0.0679	-0.0146	0.5769	1.3279	1.0755	1.1265	1.8073	1.4933	1.5889	1.2238	3.7841	1.0867	0.8489	1.0383	0.6306	0.7535	0.1706	1.5827	0.6832	0.8012	1.0097	0.704	1.0215	0.663	0.0889	0.3361	0.5458	1.0188	1.1106	1.4402	1.1701	0.6926	0.8192	0.8414	0.5913	0.01	-0.0984	-0.1038	0.1702	-0.0924	-0.2046	0.3552
578	-0.1424	-0.0385	0.2109	-0.095	0.0257	0.0263	-0.1142	-0.0849	-0.0346	1.0119	1.1409	1.2375	1.1945	1.9113	1.4453	1.5449	1.4748	3.5851	1.1287	0.8289	1.0033	0.4816	0.7175	0.2966	1.1427	0.4782	0.7592	0.9677	0.687	1.0025	0.607	0.0629	0.3851	0.4858	1.0578	1.0016	1.4442	1.1861	0.5716	0.8362	0.8364	0.7203	-0.02	-0.0734	-0.1178	-0.1388	-0.0754	-0.1996	0.3682
580	-0.1814	-0.1415	0.0519	-0.088	-0.0113	0.0433	-0.2292	-0.0159	-0.0366	0.8519	1.3149	1.2045	1.1605	1.8343	1.5293	1.7609	1.3258	3.1461	1.0207	0.7989	0.8033	0.8556	0.9835	0.2566	1.1827	0.4272	0.6962	0.9487	0.876	1.1415	0.566	0.1259	0.4311	0.6818	0.9708	1.0616	1.4492	1.2401	0.5336	0.8552	0.9624	0.7613	0.066	-0.0754	-0.0098	0.0422	-0.0734	-0.2096	0.4462
582	-0.2214	-0.0615	0.2189	-0.106	-0.0713	0.0083	-0.2182	-0.0589	0.0354	0.9789	1.1869	1.1185	1.0685	1.9923	1.4413	1.6339	1.2498	3.1581	1.1157	0.8689	0.8483	0.9096	0.7825	0.2476	1.4507	0.5852	0.5912	0.9167	0.789	0.9935	0.611	0.1039	0.3681	0.6658	1.0948	1.2406	1.4892	1.3031	0.7616	0.8382	1.0154	0.6143	0.104	-0.0314	-0.1168	-0.0178	-0.1334	-0.2426	0.3632
584	-0.1674	-0.0415	0.0189	-0.063	-0.0233	-0.0387	-0.1772	-0.0769	-0.0176	1.1539	1.2129	1.1225	1.1465	2.0563	1.4483	1.8179	1.2648	3.4461	1.1017	0.8399	0.9133	0.7116	0.8755	0.2366	1.3297	0.7052	0.6122	1.0187	0.662	1.0135	0.622	0.0879	0.3781	0.5608	0.9888	1.0236	1.4262	1.1951	0.7456	0.9002	0.8604	0.6423	0.02	-0.0724	-0.1538	-0.0978	-0.0634	-0.0926	0.1852
586	-0.1374	-0.0655	0.1549	-0.196	-0.1063	0.0613	-0.1462	-0.1089	-0.0086	0.9139	1.4579	1.0075	0.9905	1.9763	1.4123	1.5849	1.3248	3.2071	1.1487	0.7249	0.8083	0.6536	0.8935	0.2566	1.1207	0.4632	0.6082	0.9917	0.642	0.9665	0.574	0.0869	0.3411	0.6478	0.9728	1.0786	1.4472	1.3151	0.6786	0.8382	0.8244	0.6923	0.145	-0.0574	-0.0718	-0.0958	-0.0334	-0.0906	0.3072
588	-0.1334	-0.1875	0.0279	-0.16	-0.1463	0.0663	-0.2242	-0.0669	0.0064	0.9459	1.3229	1.0265	0.9595	1.9703	1.3953	1.6279	1.2728	3.4531	1.2667	0.7839	0.9313	0.5716	0.8605	0.2546	1.3137	0.4002	0.7192	1.0347	0.755	1.1185	0.569	0.1049	0.3691	0.7968	1.0518	1.2196	1.5692	1.0321	0.6346	0.8972	0.7824	0.7633	0.031	-0.0224	-0.0968	-0.0728	-0.1104	-0.2306	0.2742
590	-0.1354	-0.1565	0.0439	-0.028	0.0257	0.0503	-0.2322	0.0271	0.0094	0.6709	1.2359	1.0435	1.0865	1.8953	1.3693	1.5579	1.2318	3.2291	1.4357	0.8719	0.8133	0.7516	1.0155	0.3406	1.4307	0.4352	0.5922	1.1047	0.722	1.0495	0.646	0.0709	0.3441	0.8178	1.0388	1.0596	1.3722	1.0261	0.6106	0.9092	0.7894	0.7103	-0.001	-0.0534	-0.1878	-0.1238	-0.1014	-0.1986	0.2372
592	-0.1344	-0.1815	0.1299	-0.123	-0.0413	-0.0567	-0.2412	-0.0549	0.0084	0.5799	1.0649	1.0735	0.9955	2.0763	1.3983	1.5809	1.2138	3.6371	1.5577	0.8909	0.8103	0.6316	0.8775	0.1246	1.3947	0.6542	0.7022	1.0537	0.727	1.0745	0.669	0.1099	0.4841	0.6178	1.0168	1.0476	1.4942	0.9741	0.6446	0.8392	0.8234	0.7263	0.04	-0.1244	-0.0928	-0.1378	-0.1014	-0.2516	0.3222
594	-0.1374	-0.0835	0.1359	-0.112	-0.0093	-0.0937	-0.2622	-0.0779	-0.1086	0.6769	1.1979	0.9785	1.0535	2.1123	1.3983	1.6469	1.2738	2.9341	1.3527	0.8859	0.8253	0.7006	0.8635	0.3226	1.3987	0.6032	0.7002	1.0367	0.782	0.9945	0.853	0.1029	0.2991	0.6198	1.0358	0.9836	1.5222	1.0551	0.7466	0.8842	0.9154	0.5993	0.001	-0.1474	-0.1138	-0.0138	-0.1644	-0.1656	0.2582
596	-0.1244	-0.1475	0.1169	-0.107	0.0137	-0.0797	-0.1902	-0.0769	-0.1286	0.5249	1.1159	0.8665	1.1735	2.0793	1.3953	1.6089	1.2988	2.7601	1.0437	0.8449	1.1453	0.7226	0.8395	0.3116	1.4837	0.4822	0.6392	1.0777	0.776	1.2165	0.622	0.2299	0.2371	0.6108	1.0568	0.8696	1.5452	1.0121	0.7416	0.8562	0.7434	0.7303	0.119	-0.0454	-0.1178	0.0762	-0.1214	-0.1666	0.2912
598	-0.2194	-0.1705	0.1929	-0.096	-0.0673	0.0033	-0.2352	-0.0999	-0.1146	0.7979	0.9359	0.9875	1.2555	2.0933	1.3833	1.6679	1.3528	2.6181	1.0657	0.7939	0.8023	0.6976	0.9205	0.3156	1.5187	0.6652	0.5752	0.9937	0.881	1.1155	0.696	0.1779	0.3211	0.6378	1.0468	0.9706	1.3422	0.9921	0.6396	0.8392	0.8894	1.0113	0.142	-0.0854	-0.1528	0.0312	0.0246	-0.2426	0.2342
600	-0.0704	-0.1145	0.2299	0.006	-0.0053	-0.0427	-0.1792	-0.0119	-0.0076	0.8149	1.0169	0.8135	1.1685	2.0073	1.5013	1.6459	1.3148	2.8781	1.1877	0.8899	0.9423	0.5606	1.0015	0.1136	1.3787	0.4632	0.5132	1.0077	0.963	1.0885	0.648	0.2799	0.2191	0.5978	1.0098	1.0056	1.5582	0.8201	0.7476	0.9312	1.0554	0.7073	0.083	-0.0394	-0.0128	-0.2518	-0.0774	-0.1706	0.1442
[truncated: 3 more columns]

## Sheet: Figure_3g_b2ar_cluster_max
genotype	B2AR_maxCI-CI_-iso
EGFP	0.2046
EGFP.1	0.1155
EGFP.2	0.4089
EGFP.3	0.153
EGFP.4	0.3247
EGFP.5	0.1453
EGFP.6	0.1008
EGFP.7	0.1031
EGFP.8	0.1714
βarr2	1.8319
βarr2.1	4.9199
βarr2.2	2.3085
βarr2.3	3.5025
βarr2.4	3.1143
βarr2.5	1.9783
βarr2.6	3.7349
βarr2.7	3.3848
βarr2.8	5.3181
βarr2.9	1.5897
βarr2.10	1.7449
βarr2-ΔCT	3.5153
βarr2-ΔCT.1	1.5766
βarr2-ΔCT.2	1.5155
βarr2-ΔCT.3	3.5556
βarr2-ΔCT.4	1.5827
βarr2-ΔCT.5	1.5252
βarr2-ΔCT.6	1.7962
βarr2-ΔCT.7	1.2907
βarr2-ΔCT.8	1.147
βarr2-ΔCT.9	1.3685
βarr2-ΔCT.10	1.107
βarr2-CLB	0.9419
βarr2-CLB.1	0.4841
βarr2-CLB.2	0.9118
βarr2-CLB.3	1.3188
βarr2-CLB.4	1.4716
βarr2-CLB.5	1.9512
βarr2-CLB.6	1.9431
βarr2-CLB.7	1.0896
βarr2-CLB.8	1.2222
βarr2-CLB.9	1.1124
βarr2-CLB.10	1.0113
βarr2-CLB,ΔCT	0.209
βarr2-CLB,ΔCT.1	0.1256
βarr2-CLB,ΔCT.2	0.1392
βarr2-CLB,ΔCT.3	0.3032
βarr2-CLB,ΔCT.4	0.1436
βarr2-CLB,ΔCT.5	0.2294
βarr2-CLB,ΔCT.6	0.4462
βarr2-CLB,ΔCT.7	0.3964
βarr2-CLB,ΔCT.8	0.7291
βarr2-CLB,ΔCT.9	0.3061

## Sheet: Fig_3h_EGFP_pm_recruitment
genotype	EGFP-tagged_PM_recruitment_Fmax_F-iso
EGFP	1.05058
EGFP.1	1.0145
EGFP.2	1.10902
EGFP.3	1.15359
EGFP.4	1.03344
EGFP.5	1.08422
EGFP.6	1.14836
EGFP.7	1.10005
EGFP.8	1.08751
barr2	1.18916
barr2.1	1.1283
barr2.2	1.3725
barr2.3	1.21082
barr2.4	1.26804
barr2.5	1.35172
barr2.6	1.40613
barr2.7	1.2219
barr2.8	1.44715
barr2.9	1.12946
barr2.10	1.54018
barr2-deltaCT	1.16879
barr2-deltaCT.1	1.42069
barr2-deltaCT.2	1.28242
barr2-deltaCT.3	1.31654
barr2-deltaCT.4	1.30556
barr2-deltaCT.5	1.33191
barr2-deltaCT.6	1.35452
barr2-deltaCT.7	1.35527
barr2-deltaCT.8	1.13189
barr2-deltaCT.9	1.3743
barr2-deltaCT.10	1.30679
barr2-CLB	1.38335
barr2-CLB.1	1.15262
barr2-CLB.2	1.33847
barr2-CLB.3	1.67628
barr2-CLB.4	1.3541
barr2-CLB.5	1.18331
barr2-CLB.6	1.26439
barr2-CLB.7	1.28831
barr2-CLB.8	1.23548
barr2-CLB.9	1.37259
barr2-CLB.10	1.2414
barr2-CLB,deltaCT	1.2364
barr2-CLB,deltaCT.1	1.05766
barr2-CLB,deltaCT.2	1.41163
barr2-CLB,deltaCT.3	1.01864
barr2-CLB,deltaCT.4	1.26344
barr2-CLB,deltaCT.5	1.19647
barr2-CLB,deltaCT.6	1.515
barr2-CLB,deltaCT.7	1.10669
barr2-CLB,deltaCT.8	1.37757
barr2-CLB,deltaCT.9	1.64171

## Sheet: Fig_3i_b2ar_internalization
	EGFP	EGFP	EGFP	barr2	barr2	barr2	barr2-deltaCT	barr2-deltaCT	barr2-deltaCT	barr2-CLB	barr2-CLB	barr2-CLB	barr2-CLB,deltaCT	barr2-CLB,deltaCT	barr2-CLB,deltaCT
%_b2ar_internal	5	16	16	64	65	66	57	52	53	18	19	18	2	-11	2
