# Supplementary material for: Discrete GPCR-triggered endocytic modes enable β-arrestins to flexibly regulate cell signaling
Source: eLife journal article supplement (doi:10.7554/elife.81563), 2022-10-17
Supplement: supp [file Figure4_source_data.xlsx]

## Sheet: Fig_4a_ExtFig_4_rec_internal
	EGFP	EGFP	EGFP	barr2	barr2	barr2	barr2-deltaCT	barr2-deltaCT	barr2-deltaCT	barr2-CLB	barr2-CLB	barr2-CLB	barr2-CLB,deltaCT	barr2-CLB,deltaCT	barr2-CLB,deltaCT
B2V2R	6.20224	13.3709	9.46548	73.2125	74.9112	76.2093	65.9123	69.294	73.6813	49.8024	44.969	50.387	0	-1	1
V2R	21	26	15	70	74	59	42	50	35	38	43	33	12	20	17
MOR	6.95744	10.1323	5.28369	44.4072	43.3758	49.3408	40.5839	35.1597	45.8721	17.2472	13.7791	11.0913	5	6	-6
KOR	-1.53812	4.00537	5.39841	34.3335	33.3566	35.6561	33.0969	24.6049	39.804	-3.33994	-1.09739	0.787999	-20	-2	3
NTSR1	23.835	27.0727	18.7591	52.4126	55.7431	61.0196	40.767	46.8354	45.0611	30.0805	41.5509	44.4798	7	8	-9
M2R	-0.95225	9.5191	12.6418	53.4019	40.2325	57.7815	35.3395	27.6502	45.9108	20.6821	17.7309	39.4309	0	2	1
