# Supplementary material for: Discrete GPCR-triggered endocytic modes enable β-arrestins to flexibly regulate cell signaling
Source: eLife journal article supplement (doi:10.7554/elife.81563), 2022-10-17
Supplement: supp [file Figure5_figure supplement-source_data 1.xlsx]

## Sheet: Ext_Fig_5_clb_pt_camp
Minutes	mApple	mApple	mApple	barr2-mApple	barr2-mApple	barr2-mApple	barr2-CLB-mApple	barr2-CLB-mApple	barr2-CLB-mApple	barr2-D205S-mApple	barr2-D205S-mApple	barr2-D205S-mApple	barr2-N216P-mApple	barr2-N216P-mApple	barr2-N216P-mApple	barr2-N216T-mApple	barr2-N216T-mApple	barr2-N216T-mApple	barr2-N218T-mApple	barr2-N218T-mApple	barr2-N218T-mApple	barr2-H220A-mApple	barr2-H220A-mApple	barr2-H220A-mApple	barr2-L208I,L215I-mApple	barr2-L208I,L215I-mApple	barr2-L208I,L215I-mApple	barr2-CLB,I208L,I215L-mApple	barr2-CLB,I208L,I215L-mApple	barr2-CLB,I208L,I215L-mApple
0	0.955707	0	0.701643	1.0329	0	0	0.465333	0.335517	0	1.58754	0	0	0.792348	0	0	0.847567	0	0.0527598	2.58927	0.771849	0	1.97773	0	0	2.81709	0.133321	0	2.48282	0	0
1	0	0.0945049	0	0.698327	0.174689	0.644313	0.33238	0	0.921659	0.699042	0.569829	0.106465	0.264897	1.12629	0.664221	0.484324	0.277904	0.120909	1.427	0.107404	0.362475	0.951757	0.0994547	0.122911	1.25842	0	1.07772	1.67961	0.665702	0.307256
2	0.253043	0.973197	0.351757	0	0.889885	0.691721	0	0.955539	1.36603	0	1.00483	0.495548	0	1.32527	0.977205	0	0.3543	0	0	0	0.299358	0	0.652195	0.864471	0	0.306637	1.35495	0	1.24457	0.969038
3	84.2632	85.1306	80.0584	83.8464	80.0464	76.4168	81.4443	80.5243	75.2853	78.0096	73.3757	73.6663	78.9887	82.9724	71.6037	78.6941	83.163	79.7522	77.6587	79.4604	75.5284	74.3484	81.3446	81.9854	74.9641	76.6613	75.7192	77.8743	81.124	74.5876
4	103.986	97.0342	94.733	102.593	94.4552	92.5225	102.147	96.2504	94.5615	101.039	94.9657	94.0399	100.471	97.0674	93.2882	99.7968	93.7688	88.2422	101.08	93.6031	89.5964	98.7012	92.2272	90.7039	99.7218	93.7035	90.1463	102.338	97.371	89.2886
5	105.525	98.1883	97.0625	102.948	93.9763	93.4513	104.607	96.6507	96.5017	102.574	96.0315	96.0743	101.334	96.766	94.9244	101.226	94.8627	90.7472	103.756	95.0922	91.6522	99.4041	93.3996	91.9924	100.152	94.5186	91.5802	103.874	98.4178	89.1657
6	105.199	98.1984	96.6789	102.8	93.331	93.753	104.458	97.051	96.6535	103.016	96.7896	96.7828	100.485	93.7349	93.6951	100.519	94.3932	91.8211	104.408	96.6741	92.9921	98.8147	91.5406	91.7097	98.0991	91.0161	92.5331	103.727	99.1703	91.8554
7	105.621	98.0395	97.9755	101.269	89.5721	93.294	103.35	97.1569	98.1256	100.152	92.811	96.1382	98.2559	90.64	92.2415	98.9059	93.1487	91.8112	103.371	97.2676	94.1246	96.0162	89.2321	90.9251	96.068	88.7001	91.9364	104.183	98.7699	91.1699
8	105.136	98.1903	96.866	99.8204	87.5067	92.3975	104.084	97.204	96.9278	100.627	90.6792	95.4588	97.0955	88.8395	91.2295	96.947	92.1733	92.0091	104.251	97.3823	94.6404	93.962	87.9181	91.8305	93.0787	86.4832	91.3471	103.925	99.8649	91.6899
9	105.446	97.8586	96.5928	99.762	85.133	92.3695	104.04	97.3943	97.8806	99.8236	88.3083	93.9895	95.3936	86.7164	89.9358	95.1827	90.5967	92.0222	103.472	97.2639	95.4393	94.63	86.8222	91.8101	91.2485	86.4242	91.2406	103.908	100.188	94.3938
10	103.062	97.7882	97.3543	99.2141	85.1926	90.6715	103.907	95.9601	97.321	97.6829	85.7543	93.1514	93.3705	86.2006	89.9689	93.6584	90.7162	90.9341	104.16	97.6808	95.3744	93.3508	85.9826	90.3044	88.1819	84.7729	90.0674	103.018	99.508	92.9142
11	102.76	98.1682	97.1728	98.6505	83.7683	90.1327	103.472	96.015	96.5749	96.7748	83.6174	92.59	93.1361	85.1168	89.0943	92.653	90.3033	91.3276	103.162	97.5479	95.3077	92.482	84.6839	89.9848	87.5373	84.211	89.8342	102.155	97.2986	92.8528
12	103.187	98.319	96.8342	97.9724	82.2722	89.3311	103.029	95.7737	96.8821	95.3833	81.2923	91.3027	91.9288	84.3208	86.9729	92.0757	89.4075	90.767	104.059	96.6723	95.4267	91.838	83.0487	90.5502	85.7799	83.6663	89.1182	101.684	96.8307	93.3916
13	104.16	98.0154	97.0643	96.9619	81.5447	88.2106	103.08	94.9829	96.1817	94.5209	79.5853	89.7542	90.745	83.2776	86.3244	90.5405	89.0377	90.3955	102.8	97.0364	94.7324	90.5108	82.2148	89.485	84.2058	82.3331	89.4064	101.011	97.2986	92.4699
14	102.911	97.9812	97.0306	96.185	81.3063	88.411	102.905	94.0627	95.8141	94.9151	79.3767	89.6554	90.5434	82.0625	85.0411	90.08	88.3159	89.7975	102.18	96.0151	94.9271	89.4805	81.3943	88.9319	84.1462	81.7808	88.4297	100.834	95.7067	92.0728
15	102.503	97.4624	96.2093	94.6514	80.3855	86.9112	101.671	94.357	95.2088	93.4103	76.8583	88.0778	89.1087	80.2349	83.3023	88.8324	87.0825	89.7481	101.502	95.2306	94.7937	88.5898	80.2161	86.781	82.4705	80.8609	88.035	99.9817	96.1843	92.5219
16	101.832	97.2835	95.9642	94.4852	78.7558	86.2345	101.611	92.911	93.916	92.3193	76.2808	87.0519	88.3258	79.2806	82.8815	87.8465	86.0041	88.8028	101.076	95.6238	94.5376	87.4853	79.0686	87.0739	80.8367	78.9925	86.5735	97.7165	94.3174	92.7677
17	101.278	97.1608	96.213	92.9965	77.6193	85.9587	100.999	92.8541	94.1994	90.4813	74.724	86.1672	86.0941	78.446	81.2836	87.4984	84.7983	88.1268	101.235	94.6881	94.828	85.9201	78.4891	85.4249	78.8255	78.0345	86.2339	97.4582	95.0121	92.3233
18	100.966	97.6153	95.8912	92.0534	76.2834	84.9825	100.922	91.9005	92.923	90.27	73.7192	85.5962	85.9956	77.6713	80.435	86.6551	84.2735	87.0881	100.71	94.7063	94.2419	83.9598	76.9915	84.4805	77.5229	77.3488	85.4462	96.594	94.0521	91.2503
19	100.763	98.0074	95.6236	91.6178	73.9714	83.5129	99.1713	91.4119	93.4972	88.9177	72.5795	83.5695	83.3537	75.8322	78.3085	84.4086	83.8683	86.2538	100.198	93.1862	93.8596	84.4226	76.739	84.587	75.9488	76.9489	84.0105	95.9169	92.4506	92.0113
20	99.8076	97.185	95.4683	90.1583	73.807	81.7287	98.9209	90.5702	92.7694	88.3188	71.0023	83.0217	83.3935	74.8141	77.6182	82.0324	82.4112	85.6383	99.0379	93.1844	93.8578	82.1393	75.1439	82.9359	73.8249	76.2385	83.1366	94.5829	93.396	90.6169
21	99.954	96.9095	94.1829	89.5228	72.1567	80.1879	98.378	89.9423	91.4619	86.6834	69.8296	81.9377	81.8932	74.1012	77.1174	82.2335	81.2354	84.7787	99.3973	93.0388	93.9533	81.2443	73.5603	82.4422	72.763	74.2386	81.5374	94.3227	92.8606	88.849
22	98.8937	96.9437	94.6806	88.1599	71.0263	79.9121	98.7613	89.0339	91.2516	85.3615	69.1096	80.0213	80.6414	72.2794	73.5181	81.267	79.3875	82.9102	97.8929	91.2493	92.8677	79.5678	72.3458	80.6109	71.8821	72.6617	80.3551	92.1022	91.0371	89.6715
23	99.7909	95.8458	93.7956	87.2797	69.4768	78.52	97.9791	88.6866	90.3628	84.375	67.8835	78.6992	78.2995	69.7332	72.9478	78.9751	78.4708	81.3614	98.616	89.682	91.324	78.2799	70.9037	79.0335	69.5485	72.6502	79.5142	92.6288	91.1577	86.8164
24	99.816	95.1561	94.3812	85.5709	68.6136	77.1732	97.0485	88.0018	90.0428	82.0057	66.4538	77.5377	77.772	70.1234	71.7828	78.0086	76.5642	79.4654	96.8533	89.6656	91.2663	76.6907	69.7561	77.7552	68.5197	70.1552	77.4506	90.2029	89.4694	88.1683
25	98.3291	94.8907	93.9546	83.6533	66.7126	75.1239	96.2153	86.0122	88.3823	81.0976	65.5533	76.0434	75.6622	67.7723	69.4876	77.0335	74.7395	78.3486	96.9092	88.2348	91.0716	74.4248	68.4919	75.9177	66.2236	68.9763	75.7394	90.1806	89.04	84.5947
26	96.6603	93.7486	92.5102	82.2432	65.6398	75.014	95.6901	85.2156	87.8648	79.5514	63.8107	74.4948	74.7597	66.051	68.373	75.1784	73.5349	75.9228	96.9351	87.5703	90.7019	73.1565	67.3941	73.6787	64.8063	67.6317	74.2064	89.1374	87.4385	84.9492
27	97.4968	93.1997	92.0537	81.1878	63.7244	72.9647	95.3733	83.7578	86.6817	78.2143	64.0142	73.1649	73.0156	64.5306	65.9961	73.1373	72.1731	74.2905	96.0117	86.4726	89.1005	72.3947	65.9616	71.7859	62.4153	66.4451	72.4457	86.2744	85.8514	82.6093
28	96.2671	91.9571	91.6851	79.1467	62.9044	71.3722	94.1102	82.4373	86.1587	76.9882	61.6459	70.36	72.1154	62.7533	64.4155	71.4962	70.3141	71.193	95.2003	85.273	87.9878	69.8625	64.2001	70.8354	60.9515	64.7862	71.1385	85.282	84.6985	80.3782
29	96.5285	90.7888	90.8655	78.8414	61.0855	69.7022	93.6715	81.1266	85.9703	76.1977	59.4785	70	69.1008	61.401	63.8017	70.1795	68.588	69.5245	94.0918	83.5654	87.0915	68.2493	62.6642	69.0532	59.4856	63.5063	68.9059	84.1514	82.9474	78.9364
30	95.3093	89.4738	90.3155	76.8317	60.0395	67.7736	93.2771	79.5059	84.3647	75.135	58.7459	68.4301	68.7374	59.1446	61.2439	69.1697	66.7135	66.8337	94.2511	81.3992	85.2088	67.3084	61.8667	66.3287	58.0682	61.5503	66.6679	81.7235	81.9875	75.4384
31	94.9872	87.27	89.0843	75.1117	58.4488	66.5582	91.6661	78.1187	82.2892	72.4347	57.1839	66.9048	66.4776	57.0388	60.0946	66.7978	65.6052	64.2408	92.3829	80.1777	83.1855	64.7326	59.518	64.399	55.8053	61.2589	64.7695	80.2493	80.492	74.7341
