# Supplementary material for: Discrete GPCR-triggered endocytic modes enable β-arrestins to flexibly regulate cell signaling
Source: eLife journal article supplement (doi:10.7554/elife.81563), 2022-10-17
Supplement: supp [file Figure5_source_data.xlsx]

## Sheet: Fig_5a_nanobit_dose_resp
[Isoproterenol], M	Nb33-SmBiT	Nb33-SmBiT	Nb33-SmBiT	v-arr-SmBiT	v-arr-SmBiT	v-arr-SmBiT	barr2-SmBiT	barr2-SmBiT	barr2-SmBiT	barr2-deltaCT-SmBiT	barr2-deltaCT-SmBiT	barr2-deltaCT-SmBiT	barr2-CLB-SmBiT	barr2-CLB-SmBiT	barr2-CLB-SmBiT	barr2-CLB,deltaCT-SmBiT	barr2-CLB,deltaCT-SmBiT	barr2-CLB,deltaCT-SmBiT	barr2-CCS-SmBiT	barr2-CCS-SmBiT	barr2-CCS-SmBiT	barr2-CLB,CCS-SmBiT	barr2-CLB,CCS-SmBiT	barr2-CLB,CCS-SmBiT
0.0001	1.25864	1.14486	1.21487	2.38486	2.1079	2.79406	5.82193	3.85297	5.51454	4.51093	4.42302	4.9455	4.73185	3.97049	5.50067	4.60634	3.44156	4.97436	5.48346	4.94378	7.68175	4.75973	4.39115	6.97866
1e-05	1.22599	1.07851	1.25313	2.27924	2.10329	2.79797	5.64738	4.19331	5.83685	4.79502	4.60403	4.83352	4.40369	3.97935	5.34541	4.76794	3.66982	5.33045	5.71071	5.20685	7.67632	4.71057	4.5781	7.23354
1e-06	1.18061	1.03034	1.19817	2.12683	1.9903	2.65826	5.28637	3.82558	5.51163	4.71789	4.37617	4.75737	4.28008	3.72887	4.89828	4.55168	3.50703	5.30856	5.38997	4.93773	7.49693	4.65097	4.44422	6.99393
1e-07	1.09621	0.991588	1.20496	1.66306	1.42635	1.85148	4.04664	2.67287	3.52956	3.54649	3.58437	4.10414	2.34084	2.27413	2.77013	3.31902	2.71088	4.04264	4.0334	3.65644	5.54439	3.41313	3.42112	4.98362
3.16e-08	1.10945	1.00146	1.09763	1.17707	1.15991	1.42524	1.96237	1.77731	2.19786	2.18913	2.4224	2.65883	1.20141	1.41768	1.07662	1.70316	1.82371	1.22846	2.32513	2.67258	1.1252	2.02306	2.45004	1.56801
1e-08	1.02041	1.03724	1.09515	0.941213	1.08312	1.17082	1.16977	1.28646	1.3667	1.27975	1.57171	1.51848	1.03697	1.09477	1.09823	1.16602	1.31983	1.26851	1.0778	1.68153	1.00341	0.993135	1.61893	1.10242
1e-09	0.982276	1.03926	1.02942	0.993777	1.04705	1.09779	0.932778	1.05049	1.04936	0.960106	1.12539	1.11273	0.92721	1.00193	0.994096	1.1389	1.03071	1.14146	0.975808	1.07976	1.00759	0.951248	1.09568	1.11871
1e-10	1	1	1	1	1	1	1	1	1	1	1	1	1	1	1	1	1	1	1	1	1	1	1	1

## Sheet: Fig_5b_nanobit_kinetics
Minutes	Nb33-SmBiT	Nb33-SmBiT	Nb33-SmBiT	v-arr-SmBiT	v-arr-SmBiT	v-arr-SmBiT	barr2-SmBiT	barr2-SmBiT	barr2-SmBiT	barr2-deltaCT-SmBiT	barr2-deltaCT-SmBiT	barr2-deltaCT-SmBiT	barr2-CLB-SmBiT	barr2-CLB-SmBiT	barr2-CLB-SmBiT	barr2-CLB,deltaCT-SmBiT	barr2-CLB,deltaCT-SmBiT	barr2-CLB,deltaCT-SmBiT	barr2-CCS-SmBiT	barr2-CCS-SmBiT	barr2-CCS-SmBiT	barr2-CLB,CCS-SmBiT	barr2-CLB,CCS-SmBiT	barr2-CLB,CCS-SmBiT
0	0.998834	1.00025	0.982918	1.01313	0.93292	1.04268	1.04241	0.95904	0.96734	1.04009	0.94244	1.06819	0.967978	1.00872	1.01937	0.966635	0.951749	1.02249	0.934333	1.00095	0.955313	1.02666	0.975037	0.978601
0.5	1.00432	0.977212	1.01604	1.01768	0.936124	1.05208	1.04558	0.974143	0.997451	0.957856	0.967486	1.00035	0.968017	0.997058	1.02919	1.00758	0.967782	0.983275	0.945876	1.0027	0.961585	1.01471	0.977728	0.975749
1	1.00949	0.997	0.9769	1.01446	0.945037	1.04506	1.01852	0.967902	0.974429	1.0656	0.957638	1.03098	0.955482	1.01646	1.04796	0.963168	0.969016	1.01289	0.940652	1.00509	0.955039	1.02557	0.970665	0.963771
1.5	1.02533	1.00811	1.01143	1.01348	0.948281	1.03449	1.00049	0.979319	0.965303	1.04041	0.956724	1.00439	0.970061	1.02458	1.04439	0.957058	0.954494	0.991443	0.958228	1.01657	0.957232	1.02018	0.979984	0.969578
2	1.00975	1.00891	1.02214	1.02178	0.948319	1.04378	1.02899	0.983289	0.963726	1.0219	0.924765	1.03203	0.994156	1.00627	1.05767	0.98647	0.935972	0.956955	0.945372	1.01239	0.96028	1.03014	0.97967	0.981539
2.5	1.01781	1.01669	0.983508	1.01268	0.949511	1.04663	1.02479	0.994085	0.978309	1.04137	0.952738	0.985195	0.99048	1.00934	1.04221	0.971641	0.932545	1.00161	0.946781	1.01785	0.966786	1.03145	0.977597	0.978971
3	0.963061	1.00795	0.973447	1.15736	0.996719	1.12758	2.81926	1.85507	2.26003	3.13017	2.89931	3.20238	1.5922	1.45727	1.66575	2.59849	2.49005	2.84707	3.76148	3.73314	4.82115	3.31669	3.13028	4.00363
3.5	0.97919	1.01079	0.98644	1.37452	1.1587	1.4182	4.0619	2.78144	3.59183	3.72655	3.81636	4.18283	2.23695	2.1099	2.56204	3.1661	3.1775	3.72658	4.57219	4.50759	6.02552	4.13085	3.69456	5.0048
4	1.00326	1.01897	1.00701	1.57781	1.3348	1.71151	4.69145	3.39782	4.47274	3.98652	4.12588	4.59981	2.88683	2.66437	3.33286	3.55753	3.52647	3.9412	4.82293	4.68053	6.36671	4.43141	3.89448	5.46312
4.5	1.02556	1.00337	1.00741	1.72221	1.46663	1.90581	5.09559	3.69034	4.84675	4.10982	4.29235	4.65008	3.29816	3.12363	3.87372	3.68009	3.61491	4.22998	4.79052	4.6759	6.39558	4.57857	3.95596	5.63435
5	1.03955	1.01925	1.02035	1.85322	1.55822	2.04684	5.18245	3.78923	5.02136	4.24769	4.25906	4.69752	3.61288	3.35965	4.18263	3.74024	3.69939	4.27612	4.70968	4.58126	6.20627	4.56631	3.94476	5.69187
5.5	1.03056	1.01241	1.042	1.90759	1.6316	2.15796	5.13728	3.8047	5.00166	4.24239	4.22635	4.71455	3.75922	3.56308	4.42581	3.74036	3.72449	4.34338	4.54408	4.44432	6.02653	4.50673	3.87533	5.70325
6	1.01508	1.00901	1.05082	1.98227	1.68941	2.21485	5.1061	3.75627	4.82332	4.19621	4.33529	4.59349	3.84087	3.6037	4.50011	3.59911	3.68768	4.31862	4.39196	4.30895	5.88611	4.38521	3.83363	5.67107
6.5	1.02041	1.02927	1.03733	2.01605	1.71938	2.24987	4.99071	3.70745	4.75394	4.07088	4.2299	4.66147	3.9484	3.65666	4.66354	3.76064	3.67554	4.28943	4.22748	4.16558	5.66981	4.36146	3.73408	5.54349
7	1.02625	1.01609	1.03865	2.02948	1.75511	2.28514	4.75407	3.59987	4.61785	4.25502	4.14806	4.63749	4.05334	3.76283	4.73864	3.7063	3.68689	4.35087	4.07544	4.03164	5.46796	4.22329	3.65877	5.46083
7.5	1.03065	1.01864	1.03971	2.06761	1.77276	2.31012	4.6606	3.54681	4.46382	4.25329	4.17733	4.6824	3.9912	3.81675	4.74105	3.62246	3.64657	4.33756	3.95163	3.90474	5.17517	4.14985	3.59802	5.37119
8	1.0243	1.02653	1.05167	2.10387	1.76689	2.30278	4.5081	3.48386	4.29678	4.06301	4.12223	4.39275	3.93575	3.79988	4.70525	3.6685	3.62959	4.37974	3.83797	3.76966	5.12296	4.10095	3.53581	5.27673
8.5	1.01461	1.02582	1.05851	2.09429	1.7848	2.32393	4.41286	3.35206	4.22141	4.14825	4.14399	4.54481	4.06578	3.77282	4.76799	3.6322	3.59128	4.38527	3.63912	3.68134	4.9219	3.99797	3.48714	5.24639
9	1.05424	1.0417	1.05158	2.09614	1.77677	2.31803	4.26937	3.23791	4.07961	4.03077	4.04379	4.40882	4.03012	3.80068	4.83141	3.6828	3.58925	4.30813	3.60671	3.57289	4.76203	3.8994	3.40893	5.13441
9.5	1.03566	1.02649	1.07115	2.10855	1.792	2.35155	4.08834	3.21933	3.96317	3.9844	4.11081	4.41939	4.05019	3.78957	4.8169	3.56032	3.50885	4.24235	3.48582	3.50842	4.64291	3.83322	3.33146	5.05776
10	1.04707	1.02752	1.07278	2.12257	1.79329	2.33336	3.95201	3.08577	3.79992	3.96556	4.02528	4.39493	3.94067	3.7353	4.74079	3.56916	3.49799	4.20469	3.39704	3.41077	4.56131	3.74529	3.28408	4.97756
10.5	1.05064	1.02165	1.08358	2.13027	1.80108	2.32848	3.9175	3.0248	3.85883	4.00163	4.04647	4.36275	4.02465	3.74643	4.69967	3.49913	3.48527	4.23416	3.2974	3.33971	4.37587	3.67155	3.22911	4.8814
11	1.04937	1.03305	1.05399	2.10696	1.79351	2.32819	3.76873	2.95792	3.65792	3.95568	3.98146	4.43192	3.95897	3.71306	4.62425	3.54662	3.58076	4.29567	3.23146	3.26888	4.32345	3.59113	3.2001	4.82383
11.5	1.03327	1.02654	1.07073	2.10729	1.79093	2.334	3.69739	2.88594	3.54643	3.90377	3.94528	4.27905	3.92337	3.57699	4.61621	3.64278	3.42055	4.23142	3.13629	3.20447	4.21504	3.53622	3.12805	4.7533
12	1.05458	1.03864	1.06472	2.12199	1.79443	2.33365	3.62156	2.83219	3.47613	3.8684	3.93701	4.0576	3.94	3.67973	4.63017	3.45519	3.4088	4.12192	3.06819	3.12687	4.14877	3.52186	3.0496	4.62803
12.5	1.06645	1.03001	1.08194	2.10112	1.78576	2.29018	3.56193	2.79726	3.41347	3.85522	3.94775	4.389	3.84146	3.64739	4.61048	3.49029	3.48044	4.11883	3.01618	3.0569	3.97551	3.42677	3.01849	4.54319
13	1.06681	1.04429	1.05575	2.09866	1.79825	2.32494	3.48281	2.75606	3.34893	3.85721	3.85882	4.4239	3.82716	3.59968	4.531	3.55138	3.40174	4.08793	2.94104	3.01813	3.94148	3.40929	2.96669	4.47326
13.5	1.06396	1.01911	1.07087	2.09854	1.77313	2.28078	3.43214	2.71346	3.28555	3.91061	3.8936	4.31252	3.89418	3.55096	4.41656	3.55072	3.40635	4.02791	2.87791	2.9693	3.93194	3.30715	2.90519	4.40308
14	1.07391	1.04324	1.09892	2.10055	1.78011	2.27914	3.37767	2.67539	3.24695	3.73139	3.8688	4.28741	3.76349	3.62654	4.37686	3.42078	3.36219	4.15604	2.84916	2.88999	3.78386	3.25926	2.88976	4.39174
14.5	1.06552	1.06172	1.07469	2.07946	1.78104	2.29996	3.23297	2.62024	3.1817	3.84004	3.73392	4.16917	3.69107	3.48593	4.38932	3.38225	3.37145	4.11592	2.78028	2.87293	3.76069	3.23388	2.82769	4.30323
15	1.05947	1.04515	1.07551	2.07395	1.76275	2.31225	3.28487	2.52905	3.1535	3.78154	3.79287	4.17941	3.71464	3.47228	4.29779	3.3547	3.38065	4.08979	2.7697	2.79841	3.66364	3.19365	2.8	4.27402

## Sheet: Fig_5c_camp_kinetics
Minutes	mApple	mApple	mApple	barr2	barr2	barr2	barr2-deltaCT	barr2-deltaCT	barr2-deltaCT	barr2-CLB	barr2-CLB	barr2-CLB	barr2-CLB,deltaCT	barr2-CLB,deltaCT	barr2-CLB,deltaCT
0	0.40383	-0.303404	-0.187809	0.149852	0.309438	0.212452	1.18699	-0.545989	-0.63857	-0.382825	0.402106	-0.230372	0.103079	0.362839	-0.415037
1	-0.524738	0.388736	0.100307	-0.0810012	-0.734915	-0.0499888	0.0562556	0.146997	0.363493	-0.54837	-1.05644	-0.409322	0.0492986	0.843811	-0.103759
2	0.120907	-0.0853323	0.0875021	-0.068851	0.425477	-0.162463	-1.24325	0.398992	0.275076	0.931195	0.654335	0.639694	-0.152378	-1.20665	0.518796
3	94.3923	90.9453	94.7627	90.1948	89.0923	87.9577	81.4188	84.3291	79.0254	92.4987	85.4365	91.4783	77.7484	75.4451	81.9778
4	99.9637	94.8706	97.6118	92.0416	95.2682	90.3197	85.7898	90.5817	84.7726	95.344	96.9184	95.5941	86.0306	93.6714	90.0231
5	99.231	97.2599	97.4518	88.6639	93.1795	83.7662	79.3261	92.9126	80.8822	97.5168	97.9931	97.0998	88.0204	93.8992	88.9217
6	99.5067	97.9236	97.2789	79.0409	86.3589	78.5098	71.5459	84.9433	75.1253	97.8583	98.0809	96.8838	79.7114	93.76	85.1465
7	99.4559	97.1366	97.3877	75.1772	86.7715	74.7982	59.4116	80.5019	66.0183	97.4547	97.3461	95.082	76.4577	92.6588	80.2059
8	100.152	98.3408	95.8703	68.8955	80.8149	70.1642	49.9269	74.6115	59.9371	96.658	98.5195	94.5945	69.7082	86.7733	74.8184
9	99.5792	98.1891	96.9011	64.8131	80.0928	67.5998	46.349	69.3984	55.9583	92.1573	96.2166	92.7741	61.3588	85.4949	69.3671
10	97.49	100.294	96.024	62.2859	77.1016	66.3551	41.7754	68.8314	53.129	90.2121	97.4887	90.565	56.048	82.3433	63.6443
11	99.0859	96.7763	94.9099	59.5885	75.606	62.4559	40.054	66.6737	49.0323	89.4051	94.6045	87.9301	51.9742	77.5209	58.6
12	96.4671	96.416	93.8919	57.1706	74.394	59.839	37.6744	61.1298	46.7531	87.015	92.9814	85.684	49.0835	74.1414	54.7051
13	95.582	98.3123	91.2733	54.0966	72.5374	55.9324	37.9444	61.8543	45.7805	84.3973	90.7114	82.3272	44.9827	71.5973	52.151
14	96.75	96.416	89.9287	53.0882	70.8742	55.0026	37.3537	61.492	43.6782	83.104	89.2309	78.7729	41.6349	68.5596	48.6232
15	95.5458	96.3307	87.9247	53.1975	67.1093	52.5807	35.261	59.0351	41.3007	80.4759	85.2939	75.342	42.2534	67.2939	46.1968
16	93.7394	94.4534	84.7362	51.7274	64.9948	50.1737	36.9824	57.2081	40.1611	76.2959	85.6229	74.7928	40.8282	63.7246	44.3132
17	92.9705	94.5956	80.2096	48.6898	63.6411	48.1642	33.9109	55.7119	39.3457	75.5096	83.3857	69.9303	39.9812	60.9906	41.8629
18	91.5631	94.8516	77.0147	48.7749	62.2228	46.0421	32.7633	53.3337	36.1823	71.0916	81.993	66.993	36.714	60.9273	39.7957
19	91.5268	93.6001	72.8466	45.5551	59.3089	44.5875	31.5819	54.7039	36.035	69.0429	79.2733	64.932	37.0502	58.9908	36.4674
20	88.8572	88.5655	69.8054	46.357	57.2331	42.9153	32.0713	49.916	32.9404	67.1702	77.9683	59.9276	35.8939	57.0796	35.765
