# Supplementary material for: Discrete GPCR-triggered endocytic modes enable β-arrestins to flexibly regulate cell signaling
Source: eLife. 2022 Oct 17;11:e81563. doi: 10.7554/eLife.81563 (PMC9681205; doi:10.7554/eLife.81563)
Supplement: Supplementary file 1. [file elife-81563-supp1.xlsx]

## Sheet: Sheet1
Plasmid	Primer_1	Primer_2	Primer_3	Primer_4
βarr2-ΔCT	TCTCGAGCTCAAGCTTaccatggg	ACCGGTGGATCCCGGGCCcagttggtgtccacgggggc
ChiA.1	TCTTGAAGATAACGTGGTTTGGTGCGGGCTTATTGGCCTTcattcgaagcttgagctcg	ACGTTATCTTCAAGAAGATCTCCCGTGATAAATCGGTGACCATCTACCTGGGGA
ChiA.2	AGACACGTACACTCTCTTGCCCTTCACGAGCTCAGGATCCACCAGCACG	AGAGTGTACGTGTCTctcacctgcgcctttcgc
ChiA.3	CACCTGGACCTGGGAGAAGTAcaggtctttgcggaaggaca	TCCCAGGTCCAGGTGttccccccaacacccaac
ChiA.4	GGTGGCGCCCGAGGCCCCCACtggggggaaggcctggta	GCCTCGGGCGCCACCACGAGGCTGCAGGAGAGC
ChiA.5	GGGTAGGTGTTGGCCCCCAGCTTCTTGATGAGGCTCTCCTGCAGCCT	GGCCAACACCTACCCCTTCCTGCTCACGTTTCCTGACTACTTGCCCTGTTCGGTGATGCT
ChiA.6	TCCTCTTCCACATCTGTGCTGTGCGTGGCGAATGCTTTGATCTCAAAGTCGAC	AGATGTGGAAGAGGACAAAATTCCCAAGAAGAGCTCCGTGCGTTTGCTGATC
ChiA.7	TCGGGGCTGGGGACCCATATCGCGtggggcaaaCTGTACCTTCC	GGTCCCCAGCCCCGAgctgaaaccacacgccac
ChiA.8	GAAGAACTGCCAGGAGGCttcagctgaaggctgggg	TCCTGGCAGTTCTTCatgtctgaccggtccctg
ChiA.9	GACGGCGAGGCGCAGGGGCTTgtcagacatgaggaagtggcgtg	CTGCGCCTCGCCGTCtcactggacaaggagctgtact
ChiA.10	GGCCACGGTCACAGGAATgggctccccatggtagtaca	CCTGTGACCGTGGCCGTGACCAACAGCACAGAGAAgac
ChiA.11	GGTCAGCGAGCTGTTTGGCGGCACTTTTTCatcttgttcgacctgagccac	AACAGCTCGCTGACCaaggtgtacaccataaccccgc
ChiA.12	GGCCAGCAAGGGCACCAGCGTCAGCGTcttacagaacgtggaactgggc	GTGCCCTTGCTGGCCAACAACCGTGAGAGAAGGGGC
ChiA.13	TGACACCGTGAGCTTCACCTTGATCTGGTAAGACACCAGGATCCCCATGA	AAGCTCACGGTGTCAcgaggcggggacgtctca
ChiA.14	AGTGGCCACTTCACTGGATGTagacaccaccagcttcacc	AGTGAAGTGGCCACTgagctgccatttgttCTCATGCA
βarr2-CLB	ACAGGAATGGGTTCCCCGTGGTAATAGATCTCTTTGCTcagtgaagcctcaaggtg	GGAACCCATTCCTGTGACCGTGGCCgtcaccaataactccaccaa
βarr1-ΔCT	tctcgagctcaagcttATGGGCGACAAAGGGACA	accggtggatcccgggccATTGGTGTCTACTGGAGTCTCG
βarr1-CLB	ACAGGAATGGGTTCCCCGTGGTAATAGATCTCTTTGCTCAGAGATGCCTCAAGGT	GGAACCCATTCCTGTGACCGTGGCCGTCACCAACAACACCAACA
βarr2-CLB,I208L,I215L	ACAGGAAGGGGTTCCCCGTGGTAATACAGCTCTTTGCTcagtgaagcctcaaggtg	GGAACCCCTTCCTGTGACCGTGGCCgtcaccaataactccaccaa
βarr2-D205S	aaggagctgtactaccatggg	gtagtacagctccttGGAcagtgaagcctcaagg
βarr2-N216P	gacgtggacattgacAGTgaggggctccccatggta	gtcaatgtccacgtcacc
βarr2-N216T	gtccacgtcaccaataactcc	attggtgacgtggacAGTgacattgaggggctcccc
βarr2-H220A	ggagttattggtgacGGCgacattgacattgaggggc	gtcaccaataactccaccaag
βarr2-L208I,L215I	GGAACCCATTAATGTGAACGTGCACgtcaccaataactccaccaa	ACATTAATGGGTTCCCCGTGGTAATAGATCTCTTTGTCcagtgaagcctcaaggtg
βarr2-SmBiT	GGCTACAGACTTTTTGAAGAAATCCTTtagTCTAGATAACTGATCATAATCAGCCATACC	ctccacttccTCCCGGGCCccagcagaactggtcgtc	CCGGGAggaagtggaGTGACGGGCTACAGACTTTTTGAAGAAATCCTTtagT
βarr2-ΔCT-SmBiT	GGCTACAGACTTTTTGAAGAAATCCTTtagTCTAGATAACTGATCATAATCAGCCATACC	ctccacttccTCCCGGGCCccagttggtgtccacgg	CCGGGAggaagtggaGTGACGGGCTACAGACTTTTTGAAGAAATCCTTtagT
βarr2-CLB-SmBiT	GGCTACAGACTTTTTGAAGAAATCCTTtagTCTAGATAACTGATCATAATCAGCCATACC	ctccacttccTCCCGGGCCccagcagaactggtcgtc	CCGGGAggaagtggaGTGACGGGCTACAGACTTTTTGAAGAAATCCTTtagT
βarr2-ΔCT,CLB-SmBiT	GGCTACAGACTTTTTGAAGAAATCCTTtagTCTAGATAACTGATCATAATCAGCCATACC	ctccacttccTCCCGGGCCccagttggtgtccacgg	CCGGGAggaagtggaGTGACGGGCTACAGACTTTTTGAAGAAATCCTTtagT
v-arr-SmBiT	GGCTACAGACTTTTTGAAGAAATCCTTtagTCTAGATAACTGATCATAATCAGCCATACC	tccacttccTCCCGGGCCccaCTCATCCATAGCCGCCTC	CCGGGAggaagtggaGTGACGGGCTACAGACTTTTTGAAGAAATCCTTtagT
β2AR-LgBiT	ACCCAAGCTGGCTAGCATGAAGACGATCATCGCCCTG	AGGAATTGTAGTACAAATGACTCACTGCTGGAATTCGGGTCGTCAG
scFv30-LgBiT	GTCTCCTCGGCCGGATCC	TCCTCGGCCGGATCCGTCTTCaCACTCGAAGATTTCG	TCCGAGTAACCATCAACAGCGGATCCGGAGAACAAAAACTCATCTCAGAAGAGGATCTG	CACACTGGACTAGTGGATCCCTACAGATCCTCTTCTGA
βarr1-ΔSL mutants	GTGTCCCGGGGCGGCGACGTGGCTGTGGAA	GTGTCCCGGGGCGGCGACGTGGCTGTGGAA
